# Supplementary material for: Caribbean Consortium for Research in Environmental and Occupational Health (CCREOH) Cohort Study: influences of complex environmental exposures on maternal and child health in Suriname
Source: PubMed Central journal article supplement — BMJ Open. 2020 Sep 13;10(9):e034702. doi: 10.1136/bmjopen-2019-034702 (PMC7488800; doi:10.1136/bmjopen-2019-034702), 2020-09-13

# BMJ Open

BMJ Open is committed to open peer review. As part of this commitment we make the peer review history of every article we publish publicly available.

When an article is published we post the peer reviewers' comments and the authors' responses online. We also post the versions of the paper that were used during peer review. These are the versions that the peer review comments apply to.

The versions of the paper that follow are the versions that were submitted during the peer review process. They are not the versions of record or the final published versions. They should not be cited or distributed as the published version of this manuscript.

BMJ Open is an open access journal and the full, final, typeset and author-corrected version of record of the manuscript is available on our site with no access controls, subscription charges or pay-per-view fees (<http://bmjopen.bmj.com>).

If you have any questions on BMJ Open's open peer review process please email [info.bmjopen@bmj.com](mailto:info.bmjopen@bmj.com)

# BMJ Open

## Cohort profile: The Caribbean Consortium for Research in Environmental and Occupational Health (CCREOH) MeKiTamara Cohort Study: Influences of complex environmental exposures on maternal and child health in Suriname

|                               |                                                                                                                                                                                                                                                                                                                                                                                                                                                                                                                                                                                                                                                                                                                                                                                                                                                                                                                                                                                                                                                                                                                                                                                                                                                                                                                                                                                                                                                                                                                                                                                                                                                 |
|-------------------------------|-------------------------------------------------------------------------------------------------------------------------------------------------------------------------------------------------------------------------------------------------------------------------------------------------------------------------------------------------------------------------------------------------------------------------------------------------------------------------------------------------------------------------------------------------------------------------------------------------------------------------------------------------------------------------------------------------------------------------------------------------------------------------------------------------------------------------------------------------------------------------------------------------------------------------------------------------------------------------------------------------------------------------------------------------------------------------------------------------------------------------------------------------------------------------------------------------------------------------------------------------------------------------------------------------------------------------------------------------------------------------------------------------------------------------------------------------------------------------------------------------------------------------------------------------------------------------------------------------------------------------------------------------|
| Journal:                      | <i>BMJ Open</i>                                                                                                                                                                                                                                                                                                                                                                                                                                                                                                                                                                                                                                                                                                                                                                                                                                                                                                                                                                                                                                                                                                                                                                                                                                                                                                                                                                                                                                                                                                                                                                                                                                 |
| Manuscript ID                 | bmjopen-2019-034702                                                                                                                                                                                                                                                                                                                                                                                                                                                                                                                                                                                                                                                                                                                                                                                                                                                                                                                                                                                                                                                                                                                                                                                                                                                                                                                                                                                                                                                                                                                                                                                                                             |
| Article Type:                 | Cohort profile                                                                                                                                                                                                                                                                                                                                                                                                                                                                                                                                                                                                                                                                                                                                                                                                                                                                                                                                                                                                                                                                                                                                                                                                                                                                                                                                                                                                                                                                                                                                                                                                                                  |
| Date Submitted by the Author: | 02-Oct-2019                                                                                                                                                                                                                                                                                                                                                                                                                                                                                                                                                                                                                                                                                                                                                                                                                                                                                                                                                                                                                                                                                                                                                                                                                                                                                                                                                                                                                                                                                                                                                                                                                                     |
| Complete List of Authors:     | Zijlmans, Wilco; Academic Hospital Paramaribo, Scientific Research Center Suriname ;<br>Wickliffe, Jeffrey; Tulane University, Global Environmental Health Sciences<br>Hindori-Mohangoo, Ashna; Netherlands Organization for Applied Scientific Research<br>MacDonald-Ottevanger, Sigrid; Academic Medical Center, Amsterdam, The Netherlands<br>Ouboter, Paul; Institute for Neotropical Wildlife & Environmental Studies, Paramaribo, Suriname<br>Landburg, Gwendolyn; Anton de Kom University of Suriname, Paramaribo, Suriname, National Zoological Collection of Suriname/Center for Environmental Research<br>Codrington, John; Academic Hospital Paramaribo, Department of Clinical Chemistry<br>Roosblad, Jimmy; Academic Hospital Paramaribo<br>Baldewsingh, Gaitree; Medical Mission Primary Health Care Suriname<br>Ramjatan, Radha ; Regional Health Service<br>Gokoel, Anisma; Academic Hospital Paramaribo, Scientific Research Center Suriname<br>Abdoel Wahid, Firoz; Tulane University<br>Fortes Soares, Lissa; Tulane University<br>Alcala, Cecilia; Tulane University<br>Boedhoe, Esther; Academic Hospital Paramaribo<br>Grünberg, Antoon; Ministry of Health, Paramaribo, Suriname, Department of Public Health<br>Hawkins, William; Tulane University<br>Shankar, Arti; Tulane University<br>Harville, Emily; Tulane University School of Public Health, Epidemiology<br>Drury, SS; Department of Psychiatry and Behavioral Sciences, Tulane University<br>Covert, Hannah; Tulane University<br>Lichtveld, Maureen; Tulane University School of Public Health and Tropical Medicine, Global environmental health sciences |
| Keywords:                     | Community child health < PAEDIATRICS, Developmental neurology & neurodisability < PAEDIATRICS, PERINATOLOGY, PUBLIC HEALTH,                                                                                                                                                                                                                                                                                                                                                                                                                                                                                                                                                                                                                                                                                                                                                                                                                                                                                                                                                                                                                                                                                                                                                                                                                                                                                                                                                                                                                                                                                                                     |

1  
2  
3  
4  
5  
6  
7  
8  
9  
10  
11  
12  
13  
14  
15  
16  
17  
18  
19  
20  
21  
22  
23  
24  
25  
26  
27  
28  
29  
30  
31  
32  
33  
34  
35  
36  
37  
38  
39  
40  
41  
42  
43  
44  
45  
46  
47  
48  
49  
50  
51  
52  
53  
54  
55  
56  
57  
58  
59  
60

|  |                                                                 |
|--|-----------------------------------------------------------------|
|  | Epidemiology < TROPICAL MEDICINE, Nutrition < TROPICAL MEDICINE |
|  |                                                                 |

SCHOLARONE™  
Manuscripts

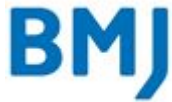

I, the Submitting Author has the right to grant and does grant on behalf of all authors of the Work (as defined in the below author licence), an exclusive licence and/or a non-exclusive licence for contributions from authors who are: i) UK Crown employees; ii) where BMJ has agreed a CC-BY licence shall apply, and/or iii) in accordance with the terms applicable for US Federal Government officers or employees acting as part of their official duties; on a worldwide, perpetual, irrevocable, royalty-free basis to BMJ Publishing Group Ltd ("BMJ") its licensees and where the relevant Journal is co-owned by BMJ to the co-owners of the Journal, to publish the Work in this journal and any other BMJ products and to exploit all rights, as set out in our [licence](#).

The Submitting Author accepts and understands that any supply made under these terms is made by BMJ to the Submitting Author unless you are acting as an employee on behalf of your employer or a postgraduate student of an affiliated institution which is paying any applicable article publishing charge ("APC") for Open Access articles. Where the Submitting Author wishes to make the Work available on an Open Access basis (and intends to pay the relevant APC), the terms of reuse of such Open Access shall be governed by a Creative Commons licence – details of these licences and which [Creative Commons](#) licence will apply to this Work are set out in our licence referred to above.

Other than as permitted in any relevant BMJ Author's Self Archiving Policies, I confirm this Work has not been accepted for publication elsewhere, is not being considered for publication elsewhere and does not duplicate material already published. I confirm all authors consent to publication of this Work and authorise the granting of this licence.

**Title:** Cohort profile: The Caribbean Consortium for Research in Environmental and Occupational Health (CCREOH) MeKiTamara Cohort Study: Influences of complex environmental exposures on maternal and child health in Suriname

## Author list

Wilco C.W.R. Zijlmans<sup>\*1,2,3</sup>, Jeffrey K. Wickliffe<sup>2</sup>, Ashna D. Hindori-Mohangoo<sup>2,4,5</sup>, M. Sigrid MacDonald-Ottevanger<sup>1,6</sup>, Paul E. Ouboter<sup>2,7,8</sup>, Gwendolyn A. Landburg<sup>7</sup>, John Codrington<sup>9</sup>, Jimmy Roosblad<sup>9</sup>, Gaitree K. Baldewsingh<sup>3,10</sup>, Radha Ramjatan<sup>3,11</sup>, Anisma Gokoel<sup>1,3</sup>, Firoz Abdoel Wahid<sup>1,2</sup>, Lissa Fortes Soares<sup>2</sup>, Cecilia S. Alcalá<sup>2</sup>, Esther Boedhoe<sup>1</sup>, Antoon W.E. Grünberg<sup>12</sup>, William B. Hawkins<sup>2,13</sup>, Arti Shankar<sup>2</sup>, Emily W. Harville<sup>14</sup>, Stacy S. Drury<sup>15</sup>, Hannah H. Covert<sup>2</sup>, Maureen Y. Lichtveld<sup>2</sup>

## Affiliations

<sup>1</sup> Scientific Research Center Suriname, Academic Hospital Paramaribo, Paramaribo, Suriname

<sup>2</sup> Department of Global Environmental Health Sciences, School of Public Health and Tropical Medicine, Tulane University, New Orleans, LA 70112, United States of America

<sup>3</sup> Faculty of Medical Sciences, Anton de Kom University of Suriname, Paramaribo, Suriname

<sup>4</sup> Perisur (Perinatal Interventions Suriname) Foundation, Paramaribo, Suriname

<sup>5</sup> Netherlands Organization for Applied Scientific Research, TNO Healthy Living, Leiden, The Netherlands

1  
2  
3 <sup>6</sup> Department of Clinical Chemistry Medical Microbiology, Academic Medical Center,  
4  
5  
6  
7  
8  
9  
10  
11  
12  
13  
14  
15  
16  
17  
18  
19  
20  
21  
22  
23  
24  
25  
26  
27  
28  
29  
30  
31  
32  
33  
34  
35  
36  
37  
38  
39  
40  
41  
42  
43  
44  
45  
46  
47  
48  
49  
50  
51  
52  
53  
54  
55  
56  
57  
58  
59  
60

<sup>6</sup> Department of Clinical Chemistry Medical Microbiology, Academic Medical Center,  
Amsterdam, The Netherlands

<sup>7</sup> National Zoological Collection of Suriname/Center for Environmental Research, Anton de Kom  
University of Suriname, Paramaribo, Suriname

<sup>8</sup> Institute for Neotropical Wildlife & Environmental Studies, Paramaribo, Suriname

<sup>9</sup> Department of Clinical Chemistry, Academic Hospital Paramaribo, Paramaribo, Suriname

<sup>10</sup> Medical Mission Primary Health Care Suriname, Paramaribo, Suriname

<sup>11</sup> Regional Health Service Nickerie, Suriname

<sup>12</sup> Department of Public Health, Ministry of Health, Paramaribo, Suriname

<sup>13</sup> Department of Health Policy, Vanderbilt University Medical Center, Nashville, TN, United  
States of America

<sup>14</sup> Department of Epidemiology, Tulane University School of Public Health and Tropical  
Medicine, New Orleans, LA, United States of America

<sup>15</sup> Tulane University School of Medicine, New Orleans, LA, United States of America

\*Corresponding author. Scientific Research Center Suriname, Academic Hospital Paramaribo,  
Picornistreet 11, Paramaribo, Suriname. Email: [cwrzijlmans@researchcentersuriname.org](mailto:cwrzijlmans@researchcentersuriname.org)

## Abstract

**Purpose:** The Caribbean Consortium for Research in Environmental and Occupational Health (CCREOH) MeKiTamara population-based prospective longitudinal cohort study addresses the potential adverse impact of complex chemical and non-chemical environmental exposures in mother/child dyads in Suriname. Associations between levels of environmental elements and toxicants in pregnant women and birth outcomes are determined and longitudinal neurodevelopmental outcomes in infants 0-4 years are measured. Also, levels of environmental elements and toxicants in fish, produce, and rice are assessed.

**Participants:** From December 2016 to date, 1067 pregnant women and 827 babies are enrolled. Exposures to mixtures of toxicants including mercury, lead, and selected pesticides are monitored and dietary, non-chemical stressors and environmental source characterization assessments take place during seven study time points: twice during pregnancy, birth, 12, 24, 36, and 48 months.

**Findings to date:** One out of four women, and predominantly those living in Suriname's interior, have hair mercury levels exceeding values considered safe by international standards. Almost 25% of women may suffer from depression, and 3 out of 10 have high stress levels. There was no statistically significant association found between hair mercury levels and adverse birth outcomes.

1  
2  
3 **Future plans:** Total mercury concentrations in blood are elevated in women from the interior of  
4  
5  
6 Suriname where the primary source of exposure to mercury is through consumption of fish. Fish  
7  
8  
9 consumption advisories may reduce exposure to these harmful substances. New research has  
10  
11  
12 recently been funded to examine effects of potentially beneficial neuroprotective factors in fish  
13  
14  
15 that may counter the neurotoxic effects of mercury. Long term effects of exposures to toxicant  
16  
17  
18 mixtures in infants are being evaluated through pediatric neurodevelopmental assessments up to  
19  
20  
21 four years of age.  
22  
23  
24  
25

26 **Keywords** environmental exposures, mercury, metal mixtures, pregnant women, pediatric  
27  
28 neurodevelopment, Suriname  
29  
30  
31  
32  
33  
34

35 **Wordcount** 3995 (excl. references, acknowledgements, tables & figures)  
36  
37  
38  
39  
40

### 41 **Strengths and limitations of this study** 42 43

- 44 • The study addresses two high priority public health threats in Suriname as well as for  
45 neighboring countries in the Guiana shield with similar practices: the impact of mercury  
46 exposure from artisanal gold mining and pesticide exposure associated with agricultural  
47 practices in two vulnerable subpopulations: pregnant women and children aged <5 years  
48 of age.  
49  
50  
51  
52  
53  
54  
55  
56  
57



- The longitudinal follow up of children up to 48 months provides several timepoints to assess neurodevelopmental outcomes.
- The study has a biospecimen bank of approximately 12,000 samples, providing the opportunity for future analyses within the cohort.
- A linked research training grant facilitates the training of nine Surinamese PhD candidates with dissertation research embedded in the study, thereby building critical in-country environmental health research capacity.
- In terms of initial challenges, the interior subcohort (N=200) is logistically difficult to reach, resulting in delayed recruitment, data collection and transport of cord blood specimens, this was corrected with additional team support onsite that facilitated recruitment of the full subcohort, and additional heelprick sampling at birth.

## Introduction

The Caribbean Consortium for Research in Environmental and Occupational Health (CCREOH) addresses the goal of high-priority environmental and occupational health risks in Suriname and those common to the vulnerable Caribbean region, while preserving the unique assets pertaining to the health and cultural traditions of indigenous and other health disparate populations [1]. Environmental contaminants may affect pregnancy, and pre- and postnatal health in multiple ways: miscarriage, preterm delivery, intra-uterine growth retardation, and congenital malformations as well as other behavioral and physical health problems that may not manifest until later in development [2, 3, 4]. Prenatal exposure to multiple heavy metals is associated with adverse pediatric health outcomes [5]. Pesticide exposure has been linked to fetal growth decrements and

1  
2  
3 preterm birth, and there is mounting evidence that exposure to pesticides during pre- and postnatal  
4 development is associated with neurodevelopmental deficits in young children [6-10]. The  
5 physiological effects of contaminants may differ in combination compared to individually; for  
6 instance, lead, arsenic, and mercury can potentiate each other's toxicity, even at individual levels  
7 below concentration expected to result in adverse effects [11]. Despite this knowledge, no  
8 cumulative risk assessments have been conducted to date addressing exposures to contaminant  
9 mixtures in Caribbean Low- and Middle-Income Countries [12]. Beyond this, there remains a  
10 paucity of studies that have examined the interactive impact of psychosocial exposures with  
11 environmental exposures.  
12  
13  
14  
15  
16  
17  
18  
19  
20  
21  
22  
23

24 The CCREOH-MeKiTamara (MeKiTamara which means "making a mother and child's  
25 tomorrow" in Suriname's local language) environmental epidemiology cohort study fills this gap  
26 by exploring the impact of exposures to organic and inorganic neurotoxicants, including mercury,  
27 lead and multiple organophosphate pesticides, on Surinamese pregnant women and their offspring  
28 (up to 48 months of age) using a cumulative risk approach. Specifically, the study assesses the  
29 impact of exposures to chemical and non-chemical psychosocial stressors by examining the  
30 interaction between exposure to environmental chemicals and social and psychological  
31 determinants of early neurodevelopment. Few prospective studies have measured prenatal  
32 exposure through 48 months, and those that have showed contrasting results when evaluating  
33 executive function, a key neurodevelopmental outcome [13-16]. Our hypothesis is that  
34 environmental exposures to mixed neurodevelopmental toxicants and non-chemical stressors will  
35 result in increased adverse birth outcomes and poorer child neurodevelopmental trajectories. Our  
36 research aims are to:  
37  
38  
39  
40  
41  
42  
43  
44  
45  
46  
47  
48  
49  
50  
51  
52  
53  
54  
55  
56  
57  
58  
59  
60

- Identify exposures to a complex mixture of environmental elements and toxicants, including mercury, lead, cadmium, aluminum, iron, manganese, tin, and selenium and selected pesticides through comprehensive dietary, environmental, and occupational risk assessments, and biomarker monitoring in Surinamese pregnant women and their offspring;
- Assess the levels of environmental elements and toxicants in fish, produce, rice, and nutraceutical compounds;
- Determine the association between birth outcomes and levels of environmental elements and toxicants in pregnant women;
- Assess the impact of mobile health technology-enabled community health workers on birth outcomes and their associations with environmental contaminants;
- Determine the association between prenatal, dietary, and environmental levels of elements and toxicants and possible neuroprotective nutraceuticals on neurodevelopment.

CCREOH is funded by the Fogarty International Center at the US National Institutes of Health (NIH).

## **Cohort description**

### **Study area**

The Republic of Suriname is located on the northeastern coast of South America, bordered by Brazil, Guyana, French Guiana, and the Atlantic Ocean. 90% of the population of 590,549 people live in the capital Paramaribo and the coastal area. The remainder live in the tropical rainforest interior (90% of the landmass). Suriname's multi-ethnic population consists of five main

1  
2  
3 groups: Hindustanis (27%), Tribal (22%), Creoles (16%), Javanese (14%), and Indigenous (4%)  
4  
5 [17].  
6  
7  
8  
9  
10

## 11 **Recruitment**

12  
13  
14 The MeKiTamara study enrolled mother/child dyads potentially exposed to complex  
15 environmental chemical- and non-chemical stressors. Main maternal and infant/child determinants  
16 included biological determinants: maternal anthropometrics, blood pressure, hemoglobin, liver and  
17 kidney function, fetal and postnatal growth characteristics and health status, heavy metals (blood  
18 and hair), pesticides (urine), telomere length (buccal swab) and medication use; environmental  
19 determinants: maternal and child diet and exposure history; social determinants: ethnicity, social  
20 support, trauma, prenatal life events, maternal education, household income, employment status,  
21 and marital status. Main maternal and infant/child outcomes were growth and physical  
22 development: pregnancy complications, fetal and postnatal growth patterns, risk factors for  
23 maternal liver and renal impairment; behavior and cognitive development: infant neuromotor  
24 development, autism spectrum disorder and neuropsychological development; childhood diseases:  
25 infectious diseases, respiratory and neurological disorders; health and healthcare: impact of mobile  
26 health technology-enabled Community Health Workers, quality of life and health care system  
27 utilization and comparison.  
28  
29  
30  
31  
32  
33  
34  
35  
36  
37  
38  
39  
40  
41  
42  
43  
44  
45

46 Pregnant women were recruited from three regions of Suriname: (1) Paramaribo, where pesticides  
47 are primarily used for residential purposes (2) Nickerie, the major rice producing region in western  
48 Suriname where pesticide use is abundant; and (3) the tropical rainforest interior, where mercury  
49 is used in artisanal gold mining and the population is highly dependent on consumption of  
50 contaminated fish (Figure 1) [18]. Recruitment sites included all hospitals and clinics of the  
51  
52  
53  
54  
55  
56  
57

1  
2  
3 Regional Health Department in Paramaribo and Nickerie and the Medical Mission Primary Health  
4 Care Suriname in the interior. Women who met the inclusion criteria were identified by their  
5  
6 treating physician, midwife, or health assistant during regular prenatal appointments and invited  
7  
8 to participate. Inclusion criteria were: pregnant women 16 years or older; speaking Dutch, Sranan  
9  
10 Tongo, Sarnami, Saramaccan or Trio; singleton gestation; planning to deliver at one of the study  
11  
12 hospitals, prenatal clinics or midwife facilities associated with those hospitals or clinics; and  
13  
14 signed informed consent. Assent was obtained from participants 16 and 17 years of age.  
15  
16  
17

18  
19  
20 Children were excluded for follow-up if they had: gestational age <33 weeks and/or birthweight  
21  
22 <2000 grams, significant medical or neurological condition, Down syndrome, hydrocephalus,  
23  
24 cerebral palsy, or significant visual or hearing impairment inconsistent with neurocognitive testing.  
25  
26  
27  
28  
29

### 30 **Follow up**

31  
32  
33 This study was IRB approved by both the Government of Suriname and the Tulane University to  
34  
35 consent 1200 pregnant women and their singleton birth children. Data were collected from the  
36  
37 women at two timepoints (trimester 1 or 2, and 3) and 24, 36, and 48 months, while the children  
38  
39 are followed at birth, 12, 24, 36 and 48 months (Table 1).  
40  
41  
42

43  
44 From December 2016 until December 2018, 1067 pregnant women were enrolled; 76 (7.1%) were  
45  
46 ineligible (Figure 2). In comparison to participants, non-participants were more often of Creole  
47  
48 and tribal ethnicity, lived in Paramaribo, and had lower household income. Of the 898 babies born,  
49  
50 827 were enrolled (92%). Initial neurodevelopmental assessments at 12 months in 491 infants are  
51  
52 being analyzed.  
53  
54  
55  
56  
57  
58  
59  
60

## Data collection during pregnancy

### *Questionnaires*

The main categories of data collected from the women are health status, demographics, reproductive health history, social support, trauma history, exposure history, depression, perceived stress, prenatal life events, health behavior, access to prenatal care, social status and diet (Table 1). Questions on health behavior were adapted from the Pregnancy Risk Assessment Monitoring System (PRAMS), a surveillance project by state health departments and the Centers for Disease Control and Prevention (CDC). Information on maternal diet was obtained by a CDC's National Health and Nutrition Examination Survey (NHANES) based culturally tailored dietary survey focusing on fish and produce consumption, including frequency of intake and portion sizes. Table 2 presents baseline maternal characteristics.

### *Measurements of heavy metals in blood and hair*

In 400 maternal whole blood samples (200 Paramaribo, 100 Nickerie, and 100 interior communities), we analyzed lead, mercury, cadmium, aluminum, manganese, tin, selenium, and iron using inductively coupled plasma-mass spectrometry (ICP-MS) or cold vapor atomic fluorescence spectrometry (CVAFS). Total mercury and methylmercury using CVAFS was assessed in a small subset of women (20-Paramaribo, 20-Nickerie, and 35-interior) to specify exposure sources.

Samples collected from participants in remote areas were stored at 4°C for no more than 48 hours prior to delivery and processing at the Academic Hospital Paramaribo clinical laboratory. Blood, serum, plasma, and cord blood samples were aliquoted into 2 ml plastic freezer tubes and stored

1  
2  
3 at -80°C. Frozen samples were shipped for analysis to the Wisconsin State Laboratory of Hygiene  
4  
5 Trace Element Research Laboratory conform formal chain-of-custody. All internal and external  
6  
7 QA/QC were acceptable. Maternal hair samples were taken according to protocol, stored at room  
8  
9 temperature in a climate-controlled room and sent to the National Zoological Collection of  
10  
11 Suriname/Center for Environmental Research lab at the Anton de Kom University of Suriname  
12  
13 (NZCS/CMO) for total mercury analysis using Cold Vapour Atomic Absorption Spectrometry  
14  
15 (CVAAS).  
16  
17  
18  
19

20 To date, the total number of biospecimens collected from 1067 pregnant women include whole  
21  
22 blood for trace elements (N=1994), whole blood collected in K<sub>2</sub>EDTA anticoagulant (N=1994),  
23  
24 serum collected in serum separator tubes (N=1994), plasma (N=1994), urine (N=1980), buccal  
25  
26 swabs (N=941), and hair (N=876); cord blood (N=441), blood from heelpricks (N=269), and  
27  
28 buccal swabs (N=363) are collected from 710 infants. All remaining samples not (yet) analyzed  
29  
30 are archived for future targeted and untargeted analyses.  
31  
32  
33  
34  
35  
36  
37

### 38 *Measurements of pesticides in urine*

39

40 Urine samples were analyzed (subcohort N=220) from all three study sites. Urine samples were  
41  
42 aliquoted into 10 ml plastic tubes, stored at -20°C and shipped for analysis by the U.S. Centers for  
43  
44 Disease Control and Prevention's environmental health laboratory. The analysis panel consisted  
45  
46 of dialkylphosphate metabolites of organophosphate pesticides (DAP's) including  
47  
48 dimethylphosphate, diethylphosphate, dimethylthiophosphate, dimethyldithiophosphate,  
49  
50 diethylthiophosphate, and diethyldithiophosphate, and a universal panel (UP) including 1  
51  
52 herbicide (2,4D) and its metabolite, 2,4-dichlorophenoxyacetic acid; 4 OP insecticide metabolites  
53  
54  
55  
56  
57  
58  
59  
60

1  
2  
3 (3,5,6-trichloro-2-pyridinol, 2-isopropyl-4-methyl-6-hydroxypyrimidine, para-nitrophenol,  
4 malathion dicarboxylic acid) and 3 pyrethroid metabolites (4-fluoro-3-phenoxybenzoic acid, 3-  
5 phenoxybenzoic acid, trans-3-(2,2-dichlorovinyl)-2,2-dimethylcyclopropane carboxylic acid).  
6  
7  
8  
9  
10  
11  
12

### 13 **Data collection from birth through 48 months**

14  
15  
16 At birth, a cord blood or heelprick sample is taken from infants for measurements of heavy metals.  
17  
18 Baseline characteristics of all live births on e.g. gender, weight, gestational age, and Apgar score  
19 are collected (Table 2). At each subsequent data collection timepoint (Table 1), the child's growth  
20  
21 is measured and a blood sample is taken for heavy metal measurement. In addition, the child's  
22  
23 health status is obtained through questionnaires on diet and history of infectious diseases, and  
24  
25 respiratory and neurological disorders.  
26  
27  
28  
29  
30  
31  
32  
33

### 34 *Telomere measurements*

35  
36  
37 Consistent evidence demonstrates that telomere length (TL) is a marker of cellular aging and links  
38  
39 TL to negative health outcomes including diabetes, cardiovascular disease and cognitive decline  
40  
41 with aging. Oxidative stress and DNA methylation, among other factors, influence TL. Arsenic  
42  
43 and pesticide exposure have both been linked to altered DNA methylation, while evidence also  
44  
45 suggests a link between mercury and elevated oxidative stress [19-23]. TL may reflect multiple  
46  
47 biological pathways through which environmental toxins influence child health and development  
48  
49 and potentially may be an earlier indicator of exposure. DNA in infants is collected at 12, 24, 36,  
50  
51 and 48 months of age using buccal swabs. The average relative TL, as represented by the telomere  
52  
53  
54  
55  
56  
57  
58  
59  
60



1  
2  
3 repeat copy number to single gene (albumin) copy number (T/S) ratio, will be determined with  
4  
5 monochrome multiplex quantitative real-time PCR using a BioRad CFX96 [24].  
6  
7  
8  
9  
10

### 11 *Behavior and cognitive development*

12  
13  
14 Neurodevelopmental assessments include infant mental and motor development and behavior at  
15  
16 12 months using the BAYLEY scale of infant development as well as assessment of cognitive and  
17  
18 social-emotional development at 36 months, and measurement of executive function at 48 months  
19  
20 (Table 1).  
21  
22  
23  
24  
25  
26

### 27 **Data management & statistical plan**

28  
29  
30 Informed consent was required for successful recruitment and where indicated assent was  
31  
32 obtained. The CCREOH field team was trained in administering all questionnaires. Data from  
33  
34 administered questionnaires are recorded on secure, encrypted iPads, uploaded and managed using  
35  
36 REDCap electronic data management system [25]. As outlined earlier, biospecimens (blood, cord  
37  
38 blood, urine, buccal swabs) are collected at all study areas and then subsequently transported to  
39  
40 the study's laboratory at the Academic Hospital in Paramaribo. Hair samples were analyzed for  
41  
42 the presence of mercury at the NZCS/CMO Environmental laboratory. Fish samples were collected  
43  
44 in areas downstream and upstream of selected villages, including gold mining areas, and analyzed  
45  
46 for mercury. Biomarker assessments not possible in Suriname are conducted at US specialty  
47  
48 laboratories.  
49  
50  
51  
52  
53  
54  
55  
56  
57  
58  
59  
60

1  
2  
3 REDCap serves as the study's integrated data management system. Data collected through iPads  
4  
5 by the field team are uploaded in the training site of REDCap for data cleaning prior to integrating  
6  
7 questionnaire and biospecimen data. Data records are maintained to see trends on source of errors;  
8  
9 duplicate records are scrubbed, and accuracy is validated through cross-checks with original data  
10  
11 files and medical records. A comprehensive biospecimen tracking system is nearing completion to  
12  
13 track analyzed samples and the overall study biospecimen repository. The data management team  
14  
15 develops de-identified data files upon request of CCREOH investigators as specified by a  
16  
17 standardized data request form. Statistical analyses are tailored to the specific research question.  
18  
19 CCREOH data have been presented at multiple local, regional, and international conferences,  
20  
21 including the Caribbean Public Health Agency, the International Society of Environmental  
22  
23 Epidemiology, the Consortium for Universities in Global Health, the American Public Health  
24  
25 Association and at scientific meetings convened by the US NIH.  
26  
27  
28  
29  
30  
31  
32  
33

### 34 **Patient and public involvement**

35  
36  
37 The CCREOH/ MeKiTamara cohort study was preceded by a pilot fish assessment study as well  
38  
39 as initial hair mercury assessment among communities in the interior which required approval  
40  
41 from the village Chiefs or Tribal captain. This community engagement component provided us a  
42  
43 rich foundation to build on as we developed the research questions. The initial study design was  
44  
45 revised based on guidance from an External Scientific Advisory Board (EAB) and multi-  
46  
47 stakeholder Community Advisory Board (CAB; consisting of respected persons in society  
48  
49 representing organizations such as from the interior tribal and indigenous peoples, midwives,  
50  
51 general practitioners and green wildlife), all participating hospitals and clinicians, and  
52  
53 representatives from the Ministry of Health, the US Embassy, the Pan American Health  
54  
55  
56  
57

1  
2  
3 Organization and the Caribbean Public Health Agency (CARPHA). For example, the CAB was  
4  
5 instrumental in urging the study team to lower the inclusion age to 16 years since many women in  
6  
7 the interior conceive at an earlier age. All stakeholders are convened annually to inform and give  
8  
9 updates about the study progress and results, and to seek advice on future directions and  
10  
11 dissemination of results. The study team is actively working with the EAB and the CAB on a  
12  
13 collaborative translation and dissemination strategy. However, a participant with neurotoxicant  
14  
15 levels of imminent public health concern is contacted by the study coordinator and asked to repeat  
16  
17 the test for confirmation. If the level remains of concern the participant is referred to her attending  
18  
19 physician according to the study's formal health care provider referral protocol. Children that are  
20  
21 found to have a neurodevelopmental delay are referred to the child psychologist for further  
22  
23 evaluation. Participants and the general public were invited to multiple health fairs, meetings and  
24  
25 conferences, where the researchers discussed the study in a broader context, provided updates on  
26  
27 the latest results and answered questions. Additionally, a Facebook account was created for study  
28  
29 participants and others interested in this study, with general information on exposure to heavy  
30  
31 metals and pesticides as well as the opportunity to ask questions of the research team and provide  
32  
33 feedback about the study.  
34  
35  
36  
37  
38  
39  
40  
41  
42  
43

## 44 **Findings to date**

45  
46  
47 Available results include total mercury concentrations in hair from pregnant women and urinary  
48  
49 pesticide metabolites that were measured in a subset of 220 women. Results on heavy metals in  
50  
51 blood, telomeres and neurodevelopmental assessments are pending.  
52  
53  
54  
55  
56  
57

## Biological specimens

Results for median total mercury concentrations in hair from pregnant women from Paramaribo (N=522) were 0.64 µg/g hair (interquartile ranges (IQR) 0.36-1.09; minimum 0.00 – maximum 7.12), from Nickerie (N=176) 0.73 µg/g (IQR 0.45-1.05; 0.00-5.79) and the interior (N=178) 1.92 µg/g (IQR 1.92-7.39; 0.38-18.20). Pregnant women from the interior are exposed to high levels of mercury compared to women in the coastal area and thus fetal exposures are expected to be high. Median concentrations are well above health action levels of 1.1 µg/g hair for mercury [26]. Most of these women are primarily exposed to methylmercury from consuming fish that are contaminated by the artisanal gold-mining activities in those areas [18,27]. Other possible sources of exposure to mercury may include active participation in or living very close to gold mining activities.

Urinary pesticide metabolites measured in a subset of 220 women are presented in Table 3. Concentrations varied geographically among participants: in Nickerie, participants' pyrethroid and herbicide metabolite concentrations were higher compared to Paramaribo and the interior, probably because of widespread agricultural use. Organophosphate metabolite concentrations were higher in Paramaribo compared to Nickerie and the interior, which could be attributed to residential use and more intense mosquito control.

## Prenatal depression and perceived stress

Depression and prenatal stress in 722 participants were assessed using the standardized Edinburgh Postnatal Depression Scale (EPDS) (cut off  $\geq 12$  for probable depression) and Cohen Perceived Stress Scale (cut off  $\geq 20$  for high stress) respectively. One in 4 (24.9%) pregnant study participants

1  
2  
3 potentially exposed to mercury had EPDS scores indicative of probable depression. Three in ten  
4  
5 participants had high stress levels and nearly half of these women had probable depression.  
6  
7  
8  
9

### 10 **Dietary exposure to pesticides**

11  
12 An assessment of Surinamese agricultural produce done by our group found pesticide residues  
13  
14 exceeding European Union maximum residue limits, including prohibited- worldwide endosulfan  
15  
16 and lindane in the leafy vegetable tannia, *Xanthosoma brasiliense* [27]. Tannia is commonly used  
17  
18 in baby food preparation in Suriname.  
19  
20  
21  
22  
23  
24

### 25 **Dietary exposures to mercury**

26  
27  
28 One in four pregnant women in our cohort, and predominantly those living in the interior who rely  
29  
30 heavily on local freshwater fish, have hair mercury levels exceeding those considered safe by the  
31  
32 US and the WHO. The dietary questionnaire (n=990) showed overall fish consumption of 96.1%.  
33  
34 Previous environmental assessments of most frequently consumed carnivorous fish by interior  
35  
36 participants, *Hoplias aimara*, *Serrasalmus rhombeus*, and *Cichla ocellaris*, showed high levels of  
37  
38 mercury [28]. Respective consumption of these three carnivorous species was 44.4%, 19.3%, and  
39  
40 26.3%. Carnivorous fish consumption was greater among the subcohort (N=123) living in the  
41  
42 interior: 89.4%, 67.5%, and 74.8%, respectively.  
43  
44  
45  
46

47 Polyunsaturated omega-3 fatty acids (PUFA-3) docosahexaenoic acid and eicosapentaenoic acid  
48  
49 from fish consumption offer neuroprotective benefits during prenatal and pediatric development  
50  
51 which could potentially counteract mercury neurotoxicity. To better inform fish consumption risk,  
52  
53 fatty acids in fish muscle tissue were measured in samples (N=5 per species) of five freshwater  
54  
55  
56  
57

1  
2  
3 and three marine fish species: freshwater species had higher levels of linoleic acid (2.0 vs. 0.2  
4 mg/g), alpha-linoleic acid (0.4 vs. 0.1 mg/g), arachidonic acid (3.0 vs. 1.5 mg/g), omega-6 fatty  
5 acids (6.5 vs. 2.3 mg/g) and lower levels of eicosapentaenoic acid (0.8 vs. 1.9 mg/g) compared to  
6 marine species. Frequent consumption of *Hoplias aimara*, a freshwater fish with high mercury and  
7 low PUFA-3 content, is likely to increase mercury exposure whereas consumption of *Plagioscion*  
8 *squamosissimus*, a freshwater fish with high mercury and high PUFA-3, may have nutritional  
9 benefits that outweigh mercury neurotoxicity. While freshwater species are a good source of these  
10 nutrients, corresponding mercury content must be assessed and considered as well.  
11  
12  
13  
14  
15  
16  
17  
18  
19  
20  
21  
22  
23  
24

### 25 **Mercury exposure and birth outcomes**

26  
27  
28 Data from 763 pregnant women were analyzed for total hair mercury and associated with birth  
29 outcomes. Adverse birth outcomes included preterm birth (PTB<37 weeks), low birthweight  
30 (LBW<2500g) and low Apgar score (AS<7 at 5 minutes). 27.3% of the women had elevated total  
31 mercury hair levels that exceeded the USEPA action level, 23.8% had adverse birth outcomes,  
32 18.4% PTB, 14.7% LBW and 5.1% had low AS. There was no statistically significant association  
33 between hair mercury level and adverse birth outcomes. Neurodevelopmental assessment of the  
34 children is ongoing.  
35  
36  
37  
38  
39  
40  
41  
42  
43  
44  
45  
46  
47

### 48 **Strengths and limitations**

49  
50  
51 The CCREOH-MeKiTamara environmental epidemiologic study is the first to examine the  
52 potential impact of complex environmental exposures on maternal and child health in Suriname  
53 by a multi-disciplinary team of scientists The study's strengths include: 1) addressing two high  
54  
55  
56  
57

1  
2  
3 priority public health threats: the impact of mercury exposure from artisanal gold mining, and  
4 pesticide exposure associated with agricultural practices; 2) inclusion in the cohort of two  
5 vulnerable subpopulations: pregnant women and children aged <5 years; 3) the longitudinal follow  
6 up with children up to 48 months with several built-in timepoints to assess neurodevelopmental  
7 outcomes; and 4) a biospecimen bank of approximately 12,000 samples, providing the opportunity  
8 for future analyses within the cohort. Moreover, a linked research training grant facilitates the  
9 training of nine Surinamese PhD candidates with dissertation research embedded in the study,  
10 thereby building critical in-country environmental health research capacity. Research  
11 dissemination throughout the Caribbean region is completed in collaboration with the Caribbean  
12 Public Health Agency.

13  
14  
15  
16  
17 In terms of initial challenges, the interior subcohort is logistically difficult to reach, resulting in  
18 delayed recruitment and data collection. Additional team support onsite facilitated recruitment of  
19 the full subcohort (N=200). Initial delays in transporting interior biospecimens rendered some  
20 early cord blood specimens not analyzable. This has been corrected by collecting an additional  
21 heelprick sample at birth.

## 22 23 24 25 26 27 28 29 30 31 32 33 34 35 36 37 38 39 40 41 42 **Future plans**

43  
44  
45 Since the most likely source of exposure to mercury in pregnant women in Suriname is through  
46 consumption of locally harvested fish, fish consumption advisories may aid in reducing exposure  
47 to environmental contaminants. Recent additional funding allows us to examine potentially  
48 beneficial neuroprotective factors such as selenium and dietary polyunsaturated fatty acids in fish  
49 that may counter the neurotoxic effects of mercury. To address the large scale and poorly regulated  
50

1  
2  
3 use of pesticides, we are developing a pesticide literacy scale through a recently funded fellowship.  
4  
5 Cohort-wide, we will undertake a comprehensive assessment of the neurodevelopmental outcomes  
6  
7 of the children, and create a robust, sharable data management system of biospecimen and non-  
8  
9 biospecimen data building on the current REDCap database.  
10  
11  
12  
13  
14  
15

## 16 **Acknowledgements**

17  
18  
19 We would like to thank our recruiters Jeetendra Jitan, Nishaira Doerga, Gimradj Dwarka, Sue-Ann  
20  
21 Sitaram, Devika Kalika, the Community Health Workers from Nickerie Lilian Singotiko, Henna  
22  
23 Mawo, Karien Jodiwongso, Karishma Bhondoe, Jay Kalicharan, Bhairam Goberdan, Azeez  
24  
25 Khodabaks, the midwives and laboratory personnel of the Academic Hospital Paramaribo,  
26  
27 Diakonessenhuis Hospital, St. Vincentius Hospital, 's-Lands Hospital, Mungra Medical Centre,  
28  
29 Regional Health Service clinics and Medical Mission Primary Health Care Suriname, the National  
30  
31 Zoological Collection of Suriname/Center for Environmental Research staff, Drs. Sila  
32  
33 Kisoensingh, Richenel Ellecom and Melissa Middleton for their help during the pediatric  
34  
35 neurodevelopment assessments, Arioene Vreedzaam for providing the study site map, and the  
36  
37 members of the External Advisory Board and Community Advisory Board for their guidance and  
38  
39 valuable advice.  
40  
41  
42  
43  
44  
45  
46  
47  
48

## 49 **Collaborators**

50  
51  
52 We welcome collaboration with fellow researchers working on similar projects. Specific research  
53  
54 proposals can be sent directly to the Principal Investigators Drs Wilco Zijlmans  
55  
56  
57



([cwrzijlmans@researchcentersuriname.org](mailto:cwrzijlmans@researchcentersuriname.org)) and Maureen Lichtveld ([mlichtve@tulane.edu](mailto:mlichtve@tulane.edu)).

Areas of collaboration include further environmental and biomarkers assessment of arsenic exposure, occupational health risk assessments associated with mercury and pesticide exposure, and exposomic analyses including metabolomic assessments.

## Author Contributions

MYL, JKW, HHC, EWH, AS, SSD and WCWRZ designed and established the cohort. MSMO, ADHM, EWH and AG participated in the design of the questionnaires. WCWRZ, MSMO, ED, WBH, GKB, RR and MYL are responsible for the continued management of the cohort. AG, GKB, RR, AG and FAW are actively involved with recruitment of participants and collection of non-biospecimen data and biospecimens. JC, JR, PEO and GAL store, archive and analyze the biomarker samples. ADHM, AS, MSMO, AG, MYL and WCWRZ are responsible for data management. SSD, AWEG, RR and EB manage neurodevelopmental testing of babies. JKW, LFS, CSA, SSD interpret all results. WCWRZ, JKW, HHC and MYL drafted and edited the manuscript. All authors critically reviewed and approved the final manuscript.

## Funding

Research reported in this publication was supported by the Fogarty International Center of the National Institutes of Health under Award Numbers: U01TW010087 and U2RTW010104. The content is solely the responsibility of the authors and does not necessarily represent the official views of the National Institutes of Health.

## Competing interests

None declared

## Patient consent for publication

Obtained

## Ethical approval

This study was IRB approved by both the Government of Suriname and the Tulane University, New Orleans, Louisiana, USA, to consent 1200 pregnant women and their singleton birth children.

## Provenance and peer review

Not commissioned; externally peer reviewed.

## Data sharing statement

MekiTamara cohort data will be made publicly available upon publication of the results in scientific articles. Questionnaire, registry and biospecimen data could be made accessible in de-identified form after an application process that includes submission of a research plan that will

1  
2  
3 undergo evaluation by the CCREOH scientific board and relevant research ethics committees.

4  
5 Currently, only part of the data is available since data collection is ongoing.  
6  
7  
8  
9  
10

## 11 **References**

- 12  
13  
14  
15  
16 1. Lichtveld MY, Hawkins WB, Ouboter PE *et al.* A One Health approach to interdict  
17 environmental health threats in Suriname. *Ann Glob Health* 2016;82:444.  
18  
19
- 20  
21 2. Silbergeld EK, Patrick TE. Environmental exposures, toxicologic mechanisms, and adverse  
22 pregnancy outcomes. *Am J Obstet Gynecol* 2005;192:S11-21.  
23  
24
- 25  
26 3. Ferguson KK, O'Neill MS, Meeker JD. Environmental contaminant exposures and preterm  
27 birth: a comprehensive review. *J Toxicol Environ Health B Crit Rev* 2013;16:69-113.  
28  
29
- 30  
31 4. Wigle DT, Arbuckle TE, Turner MC *et al.* Epidemiologic evidence of relationships between  
32 reproductive and child health outcomes and environmental chemical contaminants. *J Toxicol*  
33 *Environ Health B Crit Rev* 2008;11:373-517.  
34  
35  
36
- 37  
38 5. Lewis M, Worobey J, Ramsay DS *et al.* Prenatal exposure to heavy metals: effect on childhood  
39 cognitive skills and health status. *Pediatrics* 1992;89:1010-5.  
40  
41  
42
- 43  
44 6. Burns CJ, McIntosh LJ, Mink PJ, Jurek AM, Li AA. Pesticide exposure and  
45 neurodevelopmental outcomes: Review of the epidemiologic and animal studies. *J Toxicol*  
46 *Environ Health B Crit Rev* 2013;16:127-283.  
47  
48  
49  
50  
51  
52  
53  
54  
55  
56  
57

- 1  
2  
3 7. Eskenazi B, Kogut K, Huen K *et al*. Organophosphate pesticide exposure, PON1, and  
4 neurodevelopment in school-age children from the CHAMACOS study. *Environ Res*  
5 2014;134C:149-57.  
6  
7
- 8  
9  
10 8. Furlong MA, Engel SM, Barr DB, Wolff MS. Prenatal exposure to organophosphate pesticides  
11 and reciprocal social behavior in childhood. *Environ Int* 2014;70:125-31.  
12  
13
- 14 9. Quirós-Alcalá L, Alkon AD, Boyce WT *et al*. Maternal prenatal and child organophosphate  
15 pesticide exposures and children's autonomic function. *Neurotoxicology* 2011;32:646-55.  
16  
17
- 18 10. Rosas LG, Eskenazi B. Pesticides and child neurodevelopment. *Curr Opin Pediatr*  
19 2008;20:191-7.  
20  
21
- 22 11. Belles M, Albina ML, Sanchez DJ *et al*. Interactions in developmental toxicology: effects of  
23 concurrent exposure to lead, organic mercury, and arsenic in pregnant mice. *Arch Environ*  
24 *Contam Toxicol* 2002;42:93-8.  
25  
26
- 27 12. Callahan MA, Sexton K. If cumulative risk assessment is the answer, what is the question?  
28 *Environ Health Perspect* 2007;115:799-806.  
29  
30
- 31 13. Golding J, Rai D, Gregory S *et al*. Prenatal mercury exposure and features of autism: a  
32 prospective population study. *Mol Autism* 2018;9:30.  
33  
34
- 35 14. Valent F, Mariuz M, Bin M *et al*. Associations of prenatal mercury exposure from maternal  
36 fish consumption and polyunsaturated fatty acids with child neurodevelopment: a prospective  
37 cohort study in Italy. *J Epidemiol* 2013;23:360-70.  
38  
39  
40  
41  
42  
43  
44  
45  
46  
47  
48  
49  
50  
51  
52  
53  
54  
55  
56  
57

15. Sapbamrer R, Hongsibsong S. Effects of prenatal and postnatal exposure to organophosphate pesticides on child neurodevelopment in different age groups: a systematic review. *Environ Sci Pollut Res Int* 2019;26:18267-90.
16. Wang J, Wu W, Li H *et al*. Relation of prenatal low-level mercury exposure with early child neurobehavioral development and exploration of the effects of sex and DHA on it. *Environ Int* 2019;126:14-23.
17. Results Eighth Population and Housing Census in Suriname (Volume 1) Demographic and Social Characteristics and Migration. *General Bureau of Statistic Studies in Suriname (ABS)* 2013.
18. Ouboter PE, Landburg G, Satnarain GU *et al*. Mercury Levels in Women and Children from Interior Villages in Suriname, South America. *Int J Environ Res Public Health* 2018;15:1007.
19. Frenck RW, Blackburn E, Shannon K. The rate of telomere sequence loss in human leukocytes varies with age. *Proc Natl Acad Sci* 1998;95:5607-10.
20. Lung FW, Chen NC, Shu BC. Genetic pathway of major depressive disorder in shortening telomeric length. *Psychiatr Genet* 2007;17:195-9.
21. Von Zglinchi T. Oxidative Stress shortens telomeres. *Trends Biochem Sci* 2002;27:339-44.
22. Gonzalo S, Jaco I, Fraga MF *et al*. DNA methyltransferases control telomere length and telomere recombination in mammalian cells. *Nat Cell Biol* 2006;8:416-24.
23. Damjanovic AK, Yang Y, Glaser R *et al*. Accelerated telomere erosion is associated with a declining immune function of caregivers of Alzheimer's disease patients. *J Immunol* 2007;179:4249-54.

- 1  
2  
3 24. Cawthon RM. Telomere length measurement by a novel monochrome multiplex qualitative  
4 PCR method. *Nucleic Acids Res* 2009;37:e21.  
5  
6  
7  
8  
9 25. Harris PA, Taylor R, Minor BL *et al*. The REDCap consortium: Building an international  
10 community of software partners, *J Biomed Inform* 2019;95:1-10. doi:  
11 10.1016/j.jbi.2019.103208  
12  
13  
14  
15  
16 26. Mercury Study Report to Congress Volume V: Health Effects of Mercury and Mercury  
17 Compounds. Volume 5. United States Environmental Protection Agency; Washington, DC,  
18 USA: 1997;1–348.  
19  
20  
21  
22  
23  
24 27. Abdoel Wahid F, Wickliffe J, Wilson M *et al*. Presence of pesticide residues on produce  
25 cultivated in Suriname. *Environ Monit Assess* 2017;189:303.  
26  
27  
28  
29 28. Ouboter PE, Landburg GA, Quik JHM, Mol JHA, van der Lugt F. Mercury Levels in Pristine  
30 and Gold Mining Impacted Aquatic Ecosystems of Suriname, South America. *Ambio*  
31 2012;41:873-82.  
32  
33  
34  
35  
36  
37  
38  
39  
40  
41  
42  
43  
44  
45  
46  
47  
48  
49  
50  
51  
52  
53  
54  
55  
56  
57  
58  
59  
60

**Table 1.** Assessments completed by the CCREOH-MeKiTamara Cohort with timeline

| Assessments                     | Trimester                        |                 | Birth | 12<br>mos | 24<br>mos | 36<br>mos | 48<br>mos |
|---------------------------------|----------------------------------|-----------------|-------|-----------|-----------|-----------|-----------|
|                                 | 1 <sup>st</sup> /2 <sup>nd</sup> | 3 <sup>rd</sup> |       |           |           |           |           |
| <b>Mother</b>                   |                                  |                 |       |           |           |           |           |
| Obstetric history               | •                                | •               |       |           |           |           |           |
| Demographics                    | •                                |                 |       |           |           |           |           |
| Residency                       | •                                | •               |       |           |           |           |           |
| Anthropometrics                 | •                                | •               |       |           |           |           |           |
| Marital status                  | •                                |                 |       |           |           |           |           |
| Ethnicity                       | •                                |                 |       |           |           |           |           |
| Occupation                      | •                                |                 |       |           |           |           |           |
| Education                       | •                                |                 |       |           |           |           |           |
| Income                          | •                                |                 |       |           |           |           |           |
| Household composition           | •                                |                 |       |           |           |           |           |
| Maternity care                  | •                                | •               |       |           |           |           |           |
| <b>Questionnaires</b>           |                                  |                 |       |           |           |           |           |
| SF 36 Health Survey             | •                                | •               |       |           |           |           |           |
| Social Support List             | •                                |                 |       |           |           |           |           |
| Brief Trauma Interview          | •                                | •               |       |           | •         | •         | •         |
| Cohen Perceived Stress Scale    | •                                | •               |       |           |           | •         | •         |
| Edinburgh Depression Scale      | •                                | •               |       |           | •         | •         | •         |
| ASSIST V3.0                     | •                                | •               |       |           | •         | •         | •         |
| Exposure History                | •                                |                 |       |           |           |           |           |
| Prenatal Life Events Scale      | •                                | •               |       |           |           |           |           |
| Subjective Social Status        | •                                | •               |       |           |           |           |           |
| Dietary Assessment              | •                                | •               |       |           |           |           |           |
| Family Environment Scale        |                                  |                 |       |           | •         | •         | •         |
| Parenting Stress Index          |                                  |                 |       |           | •         | •         | •         |
| <b>Biological samples</b>       |                                  |                 |       |           |           |           |           |
| Hair                            | •                                |                 |       |           |           |           |           |
| Blood                           | •                                | •               |       |           |           |           |           |
| Urine                           | •                                | •               |       |           |           |           |           |
| Buccal swab                     | •                                |                 |       |           |           |           |           |
| <b>Infant at birth</b>          |                                  |                 |       |           |           |           |           |
| Mode of delivery                |                                  |                 | •     |           |           |           |           |
| Cord blood sample               |                                  |                 | •     |           |           |           |           |
| Birth outcomes                  |                                  |                 | •     |           |           |           |           |
| <b>Child</b>                    |                                  |                 |       |           |           |           |           |
| Physical examination            |                                  |                 |       | •         | •         | •         | •         |
| <b>Questionnaires</b>           |                                  |                 |       |           |           |           |           |
| General Health Questionnaire    |                                  |                 |       | •         | •         | •         | •         |
| M-CHAT                          |                                  |                 |       |           |           | •         |           |
| Child Behavior Checklist        |                                  |                 |       |           |           | •         | •         |
| <b>Neurodevelopmental tests</b> |                                  |                 |       |           |           |           |           |
| Bayley                          |                                  |                 |       | •         |           |           |           |

|                    |   |   |   |   |   |
|--------------------|---|---|---|---|---|
| WIPPSI             |   |   |   | • |   |
| CANTAB             |   |   |   |   | • |
| Biological samples |   |   |   |   |   |
| Buccal swab        | • | • | • | • |   |
| Blood              |   | • | • | • | • |

Notes: ASSIST V3.0 = Alcohol, Smoking and Substance Involvement Screening Test Version 3, Subjective Social Status = MacArthur Scale of Subjective Social Status, M-CHAT = Modified Checklist for Autism in Toddlers, Bayley = Bayley Scales of Infant Development, WIPPSI = Wechsler Preschool and Primary Scale of Intelligence, CANTAB = Cambridge Neuropsychological Test Automated Battery.

For peer review only

1  
2  
3  
4  
5  
6  
7  
8  
9  
10  
11  
12  
13  
14  
15  
16  
17  
18  
19  
20  
21  
22  
23  
24  
25  
26  
27  
28  
29  
30  
31  
32  
33  
34  
35  
36  
37  
38  
39  
40  
41  
42  
43  
44  
45  
46  
47  
48  
49  
50  
51  
52  
53  
54  
55  
56  
57  
58  
59  
60



**Table 2.** Maternal and infant characteristics

| Maternal characteristics (N=1067) | N   | %    | Infant characteristics (N=898)              | N   | %    |
|-----------------------------------|-----|------|---------------------------------------------|-----|------|
| <u>Age at intake</u>              |     |      | <u>Gender</u>                               |     |      |
| 16-19 years                       | 133 | 12.4 | Male                                        | 461 | 52.3 |
| 20-24 years                       | 239 | 22.4 | Female                                      | 421 | 47.7 |
| 25-29 years                       | 280 | 26.2 | Missing                                     | 16  | 1.8  |
| 30-34 years                       | 252 | 23.6 | <u>Birth status</u>                         |     |      |
| 35-39 years                       | 129 | 12.1 | Live birth                                  | 863 | 96.1 |
| 40+ years                         | 34  | 3.2  | Stillbirth                                  | 35  | 3.9  |
| Missing                           | 0   | 0.0  | Missing                                     | 0   | 0.0  |
| <u>Parity</u>                     |     |      | <u>Birthweight</u>                          |     |      |
| 0 previous live births            | 344 | 33.0 | Low birthweight (<2500 g)                   | 113 | 12.9 |
| 1 previous live birth             | 298 | 28.6 | Normal birthweight (≥2500g)                 | 760 | 87.1 |
| 2 previous live births            | 174 | 16.7 | Missing                                     | 25  | 2.8  |
| 3 previous live births            | 102 | 9.8  | <u>Gestational age</u>                      |     |      |
| 4+ previous live births           | 124 | 11.9 | Miscarriages                                | 10  | 1.1  |
| Missing                           | 25  | 2.3  | Very preterm births (22+0-32+6 weeks)       | 36  | 4.1  |
| <u>Ethnicity</u>                  |     |      | Moderately preterm births (33+0-36+6 weeks) | 93  | 10.7 |
| Creole                            | 245 | 23.0 | Term births (≥37+0 weeks)                   | 733 | 84.1 |
| Hindustani                        | 222 | 20.8 | Missing                                     | 26  | 2.9  |
| Indigenous                        | 149 | 14.0 | <u>Apgar score at 5 minutes</u>             |     |      |
| Javanese                          | 94  | 8.8  | 0 - 6                                       | 46  | 5.2  |
| Tribal                            | 223 | 20.9 | 7 - 10                                      | 832 | 94.8 |
| Mixed                             | 128 | 12.0 | Missing                                     | 20  | 2.2  |
| Other                             | 5   | 0.5  |                                             |     |      |
| Missing                           | 1   | 0.1  |                                             |     |      |
| <u>Educational level</u>          |     |      |                                             |     |      |
| No or primary                     | 223 | 20.9 |                                             |     |      |
| Lower vocational/secondary        | 375 | 35.2 |                                             |     |      |
| Upper vocational/secondary        | 302 | 28.3 |                                             |     |      |

|                                     |     |      |
|-------------------------------------|-----|------|
| Tertiary                            | 166 | 15.6 |
| Missing                             | 1   | 0.1  |
| Household income SRD*               |     |      |
| <1500                               | 321 | 33.2 |
| 1500-2999                           | 330 | 34.1 |
| 3000-4999                           | 210 | 21.7 |
| 5000+                               | 106 | 11.0 |
| Missing                             | 100 | 9.4  |
| Marital status                      |     |      |
| Married or living with partner      | 922 | 86.8 |
| Not married/not living with partner | 140 | 13.2 |
| Missing                             | 5   | 0.5  |

---

\* SRD = Surinamese dollar, equivalent to 0.13 USD.

**Table 3:** Urinary pesticide metabolites presented as arithmetic mean ( $\pm$  standard deviations) and median concentrations. Ranges from minimum (LOD\*-corrected) to maximum are presented as well as the LODs and the percentage of samples below the LOD. Total sample size is 218

| Analyte                                                              | Mean (Standard Deviation)<br>(ug/L) | Median<br>(ug/L) | Range<br>(ug/L) | LOD<br>(ug/L) | % Below<br>LOD |
|----------------------------------------------------------------------|-------------------------------------|------------------|-----------------|---------------|----------------|
| Chemical Class: Phenoxy Acetic Acid Herbicide                        |                                     |                  |                 |               |                |
| 2, 4- Dichlorophenoxyacetic acid                                     | 0.61 (0.92)                         | 0.28             | 0.11-7.50       | 0.15          | 35.32          |
| Chemical Class: Organophosphate Insecticide                          |                                     |                  |                 |               |                |
| Malathion dicarboxylic acid                                          | 0.82 (3.55)                         | 0.35             | 0.35-51.68      | 0.50          | 76.61          |
| 3,5,6-Trichloro-2-pyridinol                                          | 1.45 (3.73)                         | 0.56             | 0.07-46.70      | 0.10          | 22.02          |
| 2-isopropyl-4-methyl-6-hydroxypyrimidine                             | 1.28 (4.32)                         | 0.31             | 0.07-52.00      | 0.10          | 16.51          |
| para-Nitrophenol                                                     | 1.28 (5.10)                         | 0.59             | 0.07-73.30      | 0.10          | 40.92          |
| Diethyldithiophosphate                                               | 0.07 (0.01)                         | 0.07             | 0.07-0.14       | 0.10          | 98.62          |
| Diethylphosphate                                                     | 2.07 (5.12)                         | 0.77             | 0.07-52.50      | 0.10          | 11.93          |
| Dimethyldithiophosphate                                              | 0.36 (1.20)                         | 0.07             | 0.07-11.70      | 0.10          | 72.48          |
| Dimethylphosphate                                                    | 1.90 (3.42)                         | 1.06             | 0.07-42.50      | 0.10          | 3.67           |
| Dimethylthiophosphate                                                | 2.64 (3.74)                         | 1.22             | 0.07-25.00      | 0.10          | 5.05           |
| Diethylthiophosphate                                                 | 1.16 (4.54)                         | 0.33             | 0.07-58.20      | 0.10          | 18.35          |
| Chemical Class: Pyrethroid Insecticide                               |                                     |                  |                 |               |                |
| 4-fluoro-3-phenoxybenzoic acid                                       | 0.07 (0.02)                         | 0.07             | 0.07-0.29       | 0.10          | 98.17          |
| 3-phenoxybenzoic acid                                                | 1.47 (3.88)                         | 0.71             | 0.07-50.70      | 0.10          | 15.14          |
| trans-3-(2,2-Dichlorovinyl)-2,2-dimethylcyclopropane carboxylic acid | 1.63 (3.32)                         | 0.42             | 0.42-27.20      | 0.60          | 60.55          |

\*LOD = Limit of Detection.

For peer review only

1  
2  
3  
4  
5  
6  
7  
8  
9  
10  
11  
12  
13  
14  
15  
16  
17  
18  
19  
20  
21  
22  
23  
24  
25  
26  
27  
28  
29  
30  
31  
32  
33  
34  
35  
36  
37  
38  
39  
40  
41  
42  
43  
44  
45  
46  
47

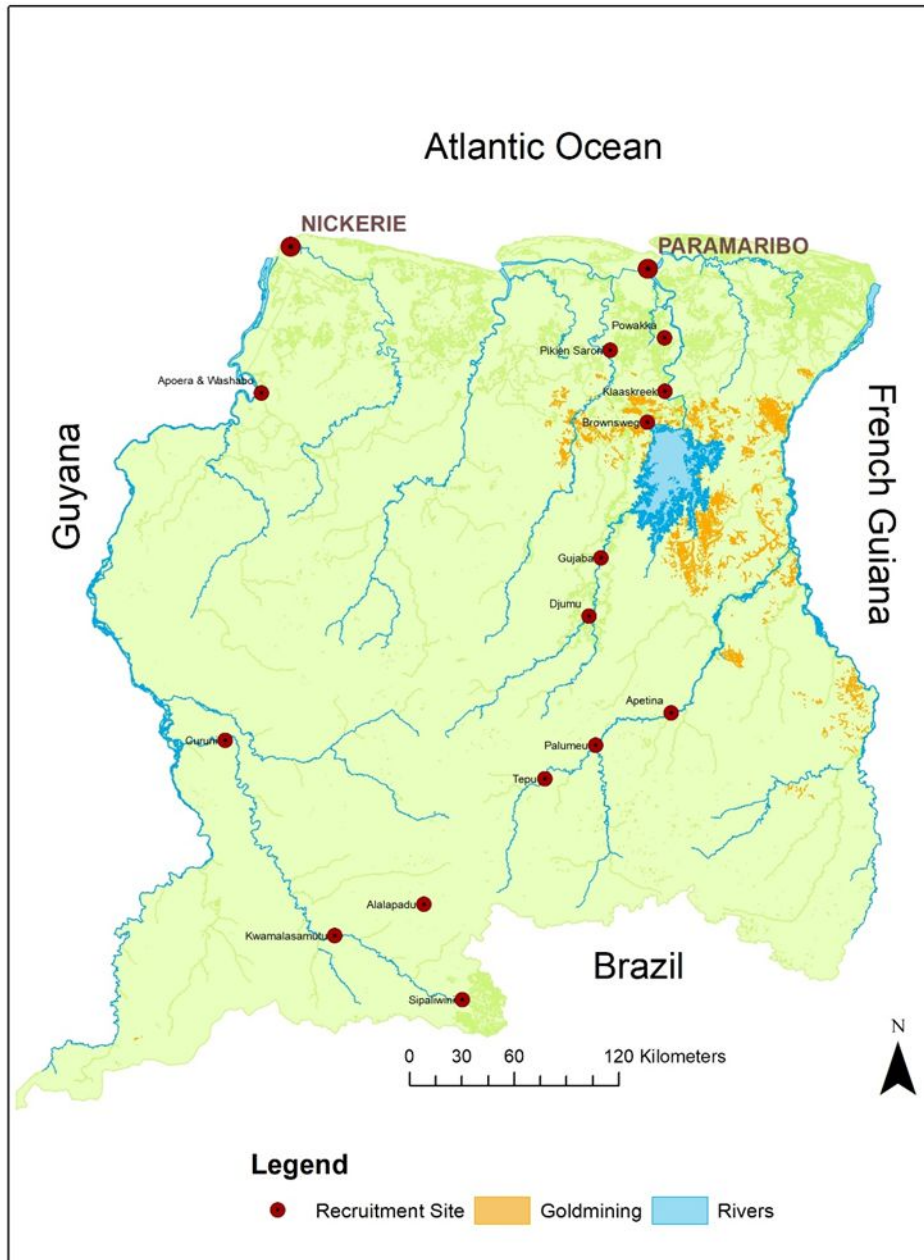

**Figure 1.** CCREOH-MeKiTamara study area with recruitment sites from three regions of Suriname: 1) the capital Paramaribo 2) Nickerie, the major rice-producing region in western Suriname and 3) the tropical rainforest interior where mercury is used in artisanal gold mining.

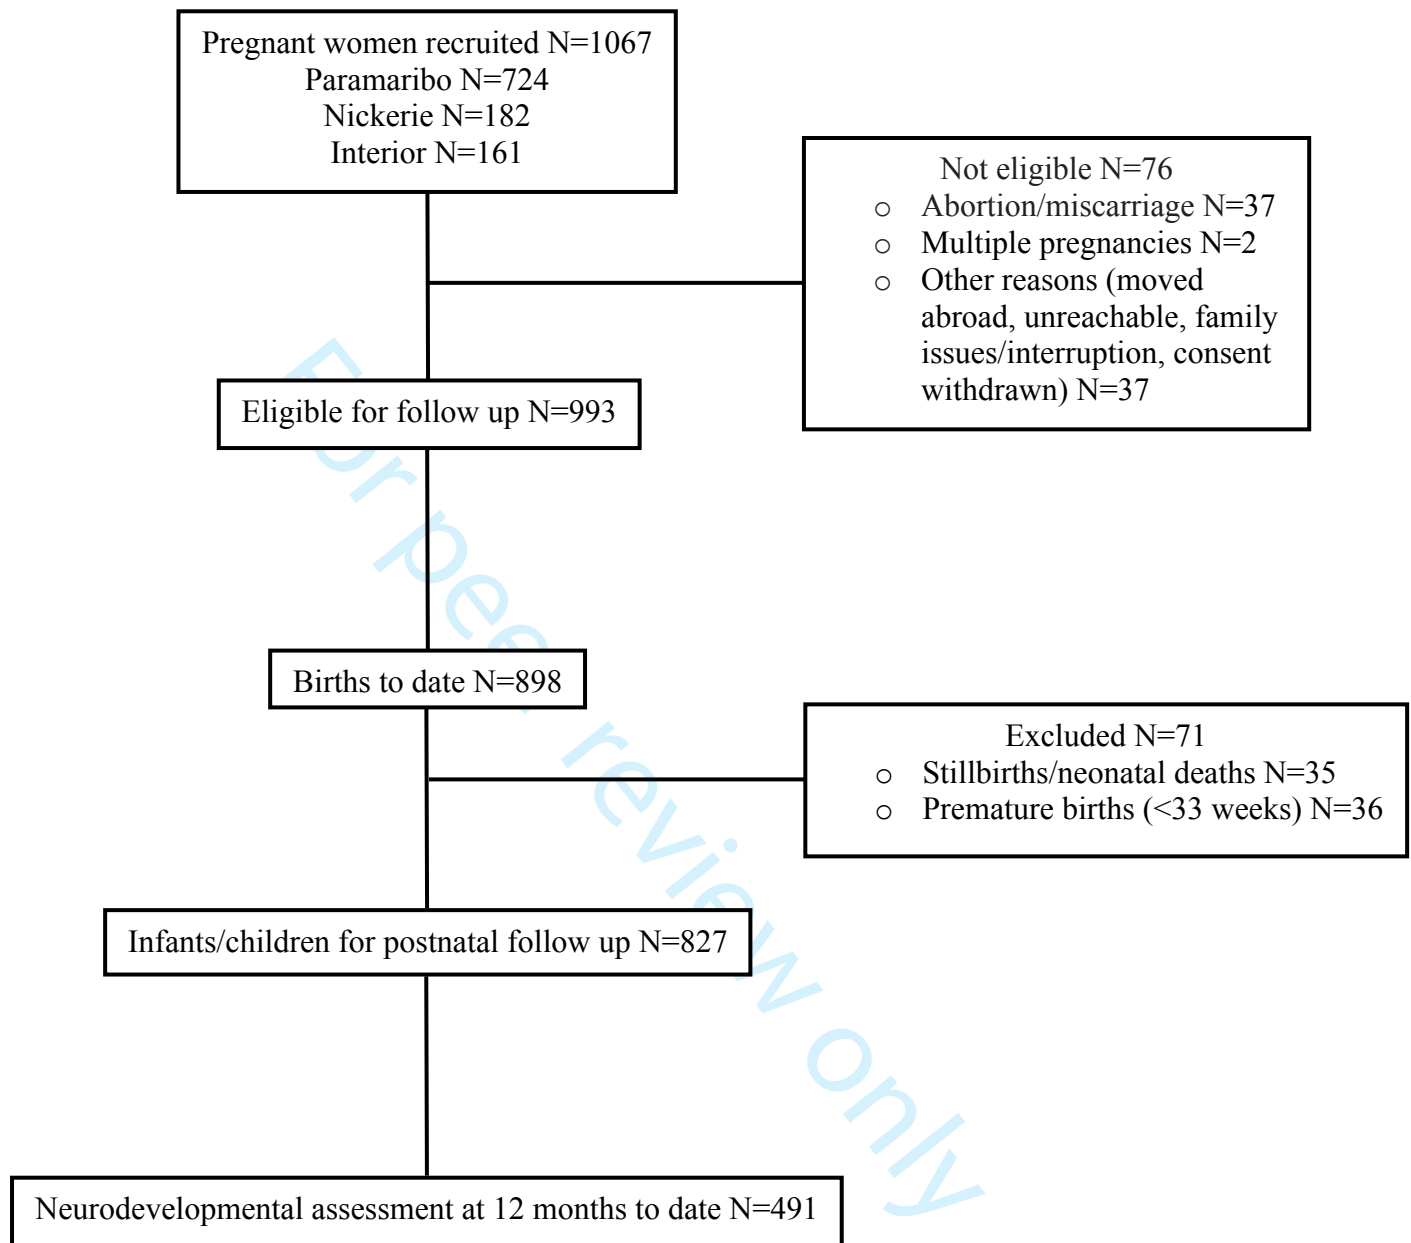

1  
2  
3  
4  
5  
6  
7  
8  
9  
10  
11  
12  
13  
14  
15  
16  
17  
18  
19  
20  
21  
22  
23  
24  
25  
26  
27  
28  
29  
30  
31  
32  
33  
34  
35  
36  
37  
38  
39  
40  
41  
42  
43  
44  
45  
46  
47  
48  
49  
50  
51  
52  
53  
54  
55  
56  
57  
58  
59  
60

**Figure 2.** Flowchart with participant enrolment.

For peer review only

# BMJ Open

## Cohort profile: The Caribbean Consortium for Research in Environmental and Occupational Health (CCREOH) MeKiTamara Cohort Study: Influences of complex environmental exposures on maternal and child health in Suriname

|                                 |                                                                                                                                                                                                                                                                                                                                                                                                                                                                                                                                                                                                                                                                                                                                                                                                                                                                                                                                                                                                                                                                                                                                                                                                                                                                                                                                                                                                                                                                                                                                                                                                                                              |
|---------------------------------|----------------------------------------------------------------------------------------------------------------------------------------------------------------------------------------------------------------------------------------------------------------------------------------------------------------------------------------------------------------------------------------------------------------------------------------------------------------------------------------------------------------------------------------------------------------------------------------------------------------------------------------------------------------------------------------------------------------------------------------------------------------------------------------------------------------------------------------------------------------------------------------------------------------------------------------------------------------------------------------------------------------------------------------------------------------------------------------------------------------------------------------------------------------------------------------------------------------------------------------------------------------------------------------------------------------------------------------------------------------------------------------------------------------------------------------------------------------------------------------------------------------------------------------------------------------------------------------------------------------------------------------------|
| Journal:                        | <i>BMJ Open</i>                                                                                                                                                                                                                                                                                                                                                                                                                                                                                                                                                                                                                                                                                                                                                                                                                                                                                                                                                                                                                                                                                                                                                                                                                                                                                                                                                                                                                                                                                                                                                                                                                              |
| Manuscript ID                   | bmjopen-2019-034702.R1                                                                                                                                                                                                                                                                                                                                                                                                                                                                                                                                                                                                                                                                                                                                                                                                                                                                                                                                                                                                                                                                                                                                                                                                                                                                                                                                                                                                                                                                                                                                                                                                                       |
| Article Type:                   | Cohort profile                                                                                                                                                                                                                                                                                                                                                                                                                                                                                                                                                                                                                                                                                                                                                                                                                                                                                                                                                                                                                                                                                                                                                                                                                                                                                                                                                                                                                                                                                                                                                                                                                               |
| Date Submitted by the Author:   | 19-Mar-2020                                                                                                                                                                                                                                                                                                                                                                                                                                                                                                                                                                                                                                                                                                                                                                                                                                                                                                                                                                                                                                                                                                                                                                                                                                                                                                                                                                                                                                                                                                                                                                                                                                  |
| Complete List of Authors:       | Zijlmans, Wilco; Academic Hospital Paramaribo, Scientific Research Center Suriname ;<br>Wickliffe, Jeffrey; Tulane University, Global Environmental Health Sciences<br>Hindori-Mohangoo, Ashna; Perisur (Perinatal Interventions Suriname) Foundation<br>MacDonald-Ottevanger, Sigrid; Academic Medical Center, Amsterdam, The Netherlands<br>Ouboter, Paul; Institute for Neotropical Wildlife & Environmental Studies, Paramaribo, Suriname<br>Landburg, Gwendolyn; Anton de Kom University of Suriname, Paramaribo, Suriname, National Zoological Collection of Suriname/Center for Environmental Research<br>Codrington, John; Academic Hospital Paramaribo, Department of Clinical Chemistry<br>Roosblad, Jimmy; Academic Hospital Paramaribo<br>Baldewsingh, Gaitree; Medical Mission Primary Health Care Suriname<br>Ramjatan, Radha ; Regional Health Service<br>Gokoel, Anisma; Academic Hospital Paramaribo, Scientific Research Center Suriname<br>Abdoel Wahid, Firoz; Tulane University<br>Fortes Soares, Lissa; Tulane University<br>Alcala, Cecilia; Tulane University<br>Boedhoe, Esther; Academic Hospital Paramaribo<br>Grünberg, Antoon; Ministry of Health, Paramaribo, Suriname, Department of Public Health<br>Hawkins, William; Tulane University<br>Shankar, Arti; Tulane University<br>Harville, Emily; Tulane University School of Public Health, Epidemiology<br>Drury, SS; Department of Psychiatry and Behavioral Sciences, Tulane University<br>Covert, Hannah; Tulane University<br>Lichtveld, Maureen; Tulane University School of Public Health and Tropical Medicine, Global environmental health sciences |
| <b>Primary Subject Heading</b>: | Occupational and environmental medicine                                                                                                                                                                                                                                                                                                                                                                                                                                                                                                                                                                                                                                                                                                                                                                                                                                                                                                                                                                                                                                                                                                                                                                                                                                                                                                                                                                                                                                                                                                                                                                                                      |



1  
2  
3  
4  
5  
6  
7  
8  
9  
10  
11  
12  
13  
14  
15  
16  
17  
18  
19  
20  
21  
22  
23  
24  
25  
26  
27  
28  
29  
30  
31  
32  
33  
34  
35  
36  
37  
38  
39  
40  
41  
42  
43  
44  
45  
46  
47  
48  
49  
50  
51  
52  
53  
54  
55  
56  
57  
58  
59  
60

|                            |                                                                                                                                                                                             |
|----------------------------|---------------------------------------------------------------------------------------------------------------------------------------------------------------------------------------------|
| Secondary Subject Heading: | Epidemiology, Global health, Public health                                                                                                                                                  |
| Keywords:                  | Community child health < PAEDIATRICS, Developmental neurology & neurodisability < PAEDIATRICS, PERINATOLOGY, PUBLIC HEALTH, Epidemiology < TROPICAL MEDICINE, Nutrition < TROPICAL MEDICINE |
|                            |                                                                                                                                                                                             |

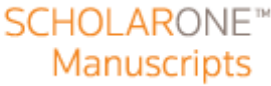



I, the Submitting Author has the right to grant and does grant on behalf of all authors of the Work (as defined in the below author licence), an exclusive licence and/or a non-exclusive licence for contributions from authors who are: i) UK Crown employees; ii) where BMJ has agreed a CC-BY licence shall apply, and/or iii) in accordance with the terms applicable for US Federal Government officers or employees acting as part of their official duties; on a worldwide, perpetual, irrevocable, royalty-free basis to BMJ Publishing Group Ltd ("BMJ") its licensees and where the relevant Journal is co-owned by BMJ to the co-owners of the Journal, to publish the Work in this journal and any other BMJ products and to exploit all rights, as set out in our [licence](#).

The Submitting Author accepts and understands that any supply made under these terms is made by BMJ to the Submitting Author unless you are acting as an employee on behalf of your employer or a postgraduate student of an affiliated institution which is paying any applicable article publishing charge ("APC") for Open Access articles. Where the Submitting Author wishes to make the Work available on an Open Access basis (and intends to pay the relevant APC), the terms of reuse of such Open Access shall be governed by a Creative Commons licence – details of these licences and which [Creative Commons](#) licence will apply to this Work are set out in our licence referred to above.

Other than as permitted in any relevant BMJ Author's Self Archiving Policies, I confirm this Work has not been accepted for publication elsewhere, is not being considered for publication elsewhere and does not duplicate material already published. I confirm all authors consent to publication of this Work and authorise the granting of this licence.

**Title:** Cohort profile: The Caribbean Consortium for Research in Environmental and Occupational Health (CCREOH) MeKiTamara Cohort Study: Influences of complex environmental exposures on maternal and child health in Suriname

## Author list

Wilco C.W.R. Zijlmans<sup>\*1,2,3</sup>, Jeffrey K. Wickliffe<sup>2</sup>, Ashna D. Hindori-Mohangoo<sup>2,4</sup>, M. Sigrid MacDonald-Ottevanger<sup>1,5</sup>, Paul E. Ouboter<sup>2,6,7</sup>, Gwendolyn A. Landburg<sup>6</sup>, John Codrington<sup>8</sup>, Jimmy Roosblad<sup>8</sup>, Gaitree K. Baldewsingh<sup>3,9</sup>, Radha Ramjatan<sup>3,10</sup>, Anisma Gokoel<sup>1,3</sup>, Firoz Abdoel Wahid<sup>1,2</sup>, Lissa Fortes Soares<sup>2</sup>, Cecilia S. Alcalá<sup>2</sup>, Esther Boedhoe<sup>1</sup>, Antoon W.E. Grünberg<sup>11</sup>, William B. Hawkins<sup>2,12</sup>, Arti Shankar<sup>2</sup>, Emily W. Harville<sup>13</sup>, Stacy S. Drury<sup>14</sup>, Hannah H. Covert<sup>2</sup>, Maureen Y. Lichtveld<sup>2</sup>

## Affiliations

<sup>1</sup> Scientific Research Center Suriname, Academic Hospital Paramaribo, Paramaribo, Suriname

<sup>2</sup> Department of Environmental Health Sciences, School of Public Health and Tropical Medicine, Tulane University, New Orleans, LA 70112, United States of America

<sup>3</sup> Faculty of Medical Sciences, Anton de Kom University of Suriname, Paramaribo, Suriname

<sup>4</sup> Perisur (Perinatal Interventions Suriname) Foundation, Paramaribo, Suriname

<sup>5</sup> Department of Clinical Chemistry Medical Microbiology, Academic Medical Center, Amsterdam, The Netherlands

1  
2  
3 <sup>6</sup> National Zoological Collection of Suriname/Center for Environmental Research, Anton de Kom  
4  
5 University of Suriname, Paramaribo, Suriname  
6  
7

8 <sup>7</sup> Institute for Neotropical Wildlife & Environmental Studies, Paramaribo, Suriname  
9

10  
11 <sup>8</sup> Department of Clinical Chemistry, Academic Hospital Paramaribo, Paramaribo, Suriname  
12  
13

14 <sup>9</sup> Medical Mission Primary Health Care Suriname, Paramaribo, Suriname  
15  
16

17 <sup>10</sup> Regional Health Service Nickerie, Suriname  
18  
19

20 <sup>11</sup> Department of Public Health, Ministry of Health, Paramaribo, Suriname  
21  
22

23 <sup>12</sup> Department of Health Policy, Vanderbilt University Medical Center, Nashville, TN, United  
24  
25 States of America  
26  
27

28 <sup>13</sup> Department of Epidemiology, Tulane University School of Public Health and Tropical  
29  
30 Medicine, New Orleans, LA, United States of America  
31  
32

33 <sup>14</sup> Tulane University School of Medicine, New Orleans, LA, United States of America  
34  
35  
36  
37  
38  
39  
40  
41  
42  
43  
44

45 \*Corresponding author. Scientific Research Center Suriname, Academic Hospital Paramaribo,  
46  
47 Picornistreet 11, Paramaribo, Suriname. Email: [cwrzijlmans@researchcentersuriname.org](mailto:cwrzijlmans@researchcentersuriname.org)  
48  
49  
50  
51  
52  
53  
54  
55  
56  
57

## Abstract

**Purpose:** The Caribbean Consortium for Research in Environmental and Occupational Health (CCREOH) MeKiTamara prospective environmental epidemiologic cohort study addresses the potential adverse impact of complex chemical and non-chemical environmental exposures in mother/child dyads in Suriname. The study determines associations between levels of environmental elements and toxicants in pregnant women and birth outcomes and neurodevelopment in the child cohort. Environmental assessments include fish, produce, and rice.

**Participants:** From December 2016 to date, 1067 pregnant women and 827 babies were enrolled. Data collection occurs at seven study time points: twice during pregnancy and at birth, 12, 24, 36, and 48 months.

**Findings to date:** Four out of ten women, and predominantly those living in Suriname's interior, had hair mercury (Hg) levels exceeding values considered safe by international standards. Findings from a dietary survey indicated that 96.1% of women ate fish potentially contaminated with mercury 3-5 times per week, while 89% frequently consumed a vegetable called tannia, samples of which showed the presence of worldwide banned pesticides. One in four pregnant study participants had high Edinburgh Postnatal Depression Scale scores indicative of probable depression.

1  
2  
3  
4  
5  
6 **Future plans:** Total blood mercury concentrations were elevated in interior women for whom fish  
7  
8 consumption is the primary source of mercury exposure. Culturally tailored fish consumption  
9  
10 advisories are in development. Research is ongoing to examine effects of potentially beneficial  
11  
12 neuroprotective factors in fish that may counter neurotoxic effects of mercury. A pesticide literacy  
13  
14 assessment in pregnant Surinamese women is in progress. Long-term effects of exposures to  
15  
16 toxicant mixtures in infants/toddlers are being evaluated through pediatric neurodevelopmental  
17  
18 assessments up to four years of age. Telomere length measurements of the mothers and children  
19  
20 as an indicator of prenatal exposure to environmental toxins are ongoing, as are the analyses of  
21  
22 biospecimen samples.  
23  
24  
25  
26  
27  
28  
29  
30  
31  
32  
33  
34

35 **Keywords** environmental exposures, mercury, metal mixtures, pregnant women, pediatric  
36  
37 neurodevelopment, Suriname  
38  
39  
40  
41  
42  
43  
44  
45  
46  
47  
48  
49

50 **Word count** 3997 (excl. references, acknowledgements, tables & figures)  
51  
52

### 53 **Strengths and limitations of this study**

- 54 • The study addresses two high priority public health threats in Suriname and neighboring  
55 countries in the Guiana Shield: the impact of mercury exposure from artisanal gold mining  
56  
57

1  
2  
3 and pesticide exposure associated with agricultural practices in two vulnerable  
4  
5 subpopulations: pregnant women and children younger than 5 years of age.  
6

- 7
- 8 • The longitudinal follow up of children to 48 months provides several timepoints to assess  
9  
10 neurodevelopmental outcomes.  
11
  - 12 • The study has a biospecimen bank of approximately 12,000 samples, providing the  
13  
14 opportunity for future biomarker analyses.  
15
  - 16 • A linked research training grant facilitates the training of nine Surinamese PhD candidates  
17  
18 with dissertation research embedded in the study, thereby building critical in-country  
19  
20 environmental health research capacity.  
21  
22
  - 23 • The interior subcohort (N=200) was logistically difficult to reach, resulting in delayed  
24  
25 recruitment, data collection and transport of cord blood specimens. Additional team  
26  
27 support onsite resulted in 100% recruitment of the subcohort, and heel prick sampling  
28  
29 replaced cord blood collection at birth.  
30  
31  
32  
33  
34  
35  
36

## 37 **Introduction**

38  
39  
40 The Caribbean Consortium for Research in Environmental and Occupational Health (CCREOH)  
41  
42 addresses high-priority environmental and occupational health risks in Suriname and those  
43  
44 common to the vulnerable Caribbean region, while preserving unique cultural traditions of  
45  
46 indigenous people and other health disparate populations [1]. Exposure to environmental  
47  
48 contaminants at levels of public health concern may adversely affect pregnancy, and pre- and  
49  
50 postnatal health in multiple ways: miscarriage, preterm delivery, intra-uterine growth retardation,  
51  
52 congenital anomalies, and behavioral and physical consequences in later developmental stages [2,  
53  
54  
55  
56  
57

1  
2  
3, 4]. Prenatal exposure to multiple heavy metals is associated with adverse pediatric health  
4  
5 outcomes [5]. Pesticide exposure has been linked to fetal growth decrements and preterm birth,  
6  
7 and there is mounting evidence that exposure to pesticides during pre- and postnatal development  
8  
9 is associated with neurodevelopmental deficits in young children [6-10]. Exposure to contaminant  
10  
11 mixtures can exacerbate adverse health effects: e.g. lead (Pb), arsenic (As), and mercury (Hg) can  
12  
13 potentiate each other's toxicity, even at individual levels below concentration expected to result in  
14  
15 adverse effects [11]. Despite this knowledge, no cumulative risk assessments have been conducted  
16  
17 to date addressing exposures to contaminant mixtures in Caribbean Low- and Middle-Income  
18  
19 Countries [12]. Furthermore, a paucity of studies examined the interactive impact of exposures to  
20  
21 chemical and non-chemical (psychosocial) stressors.  
22  
23  
24  
25

26  
27 The CCREOH-MeKiTamara (MeKiTamara means “making a mother and child's tomorrow” in  
28  
29 Suriname's local language) environmental epidemiology cohort study fills this gap by exploring  
30  
31 the impact of exposures to organic and inorganic neurotoxicants, including Hg, Pb and multiple  
32  
33 organophosphate pesticides, on Surinamese pregnant women and their offspring using a  
34  
35 cumulative risk approach. Specifically, the study assesses the impact of exposures to chemical and  
36  
37 non-chemical stressors by examining the interaction between exposure to environmental chemicals  
38  
39 and social and psychological determinants of early neurodevelopment. Few prospective studies  
40  
41 have measured exposure prenatally through 48 months in mother/child dyads, and those that have  
42  
43 showed contrasting results when evaluating executive function, a key neurodevelopmental  
44  
45 outcome [13-16]. Our hypothesis is that environmental exposures to mixtures of  
46  
47 neurodevelopmental toxicants and non-chemical stressors will result in increased adverse birth  
48  
49 outcomes and poorer child neurodevelopmental trajectories. Our research aims are to:  
50  
51  
52  
53  
54  
55  
56  
57  
58  
59  
60



- Identify exposures to a complex mixture of environmental elements and toxicants, including Hg, Pb, cadmium (Cd), aluminum (Al), iron (Fe), manganese (Mn), tin (Tn), selenium (Se) and selected pesticides through comprehensive dietary and environmental risk assessments, and biomarker monitoring in Surinamese pregnant women and their offspring;
- Assess the levels of environmental elements and toxicants in fish, produce, rice, and nutraceutical compounds;
- Determine the association between levels of environmental elements and toxicants in pregnant women and birth outcomes;
- Assess the impact of mobile health technology-enabled community health workers on birth outcomes and their associations with environmental contaminants;
- Determine the association between prenatal, dietary, and environmental levels of elements and toxicants and possible neuroprotective nutraceuticals on neurodevelopment.

CCREOH is funded by the Fogarty International Center at the US National Institutes of Health (NIH).

## **Cohort description**

### **Study area**

The Republic of Suriname is located on the northeastern coast of South America, bordered by Brazil, Guyana, French Guiana, and the Atlantic Ocean. 90% of the population of 590,549 people live in the capital Paramaribo and the coastal area. The remainder live in the tropical rainforest interior (90% of the landmass). Suriname's multi-ethnic population consists of five main

1  
2  
3 groups: Hindustani (27%), Tribal (22%), Creole (16%), Javanese (14%), and Indigenous (4%)  
4  
5 [17].  
6  
7  
8  
9  
10

## 11 **Recruitment**

12  
13  
14 The MeKiTamara study enrolled mother/child dyads potentially exposed to complex  
15 environmental chemical- and non-chemical stressors. This study was approved by the Institutional  
16 Review Boards of both the Government of Suriname and Tulane University to consent 1200  
17 pregnant women and their singleton birth children. Pregnant women were recruited from three  
18 regions of Suriname: (1) Paramaribo, where pesticides are primarily used for residential purposes;  
19 (2) Nickerie, the major rice producing region in western Suriname where pesticide use is abundant;  
20 and (3) the tropical rainforest interior, where Hg is used in artisanal gold mining and the population  
21 is highly dependent on consumption of contaminated fish (Figure 1) [18].  
22  
23  
24  
25  
26  
27  
28  
29  
30  
31  
32

33 Recruitment sites included all hospitals and clinics of the Regional Health Department in  
34 Paramaribo and Nickerie and the Medical Mission Primary Health Care Suriname in the interior.  
35 In Nickerie, trained community health workers (CHWs) were integrated in the research team and  
36 played a key role in every aspect of the study, from recruitment to assessments at every study time  
37 point prenatally and during the neurodevelopmental assessments of the child cohort. Women who  
38 met the inclusion criteria were identified by their physician, midwife, CHW or health assistant  
39 during regular prenatal appointments and invited to participate. Inclusion criteria were: pregnant  
40 women 16 years or older; speaking Dutch, Sranan Tongo, Sarnami, Saramaccan or Trio; singleton  
41 gestation; planning to deliver at one of the study hospitals, prenatal clinics or midwife facilities  
42  
43  
44  
45  
46  
47  
48  
49  
50  
51  
52  
53  
54  
55  
56  
57  
58  
59  
60

1  
2  
3 associated with those hospitals or clinics; and signed informed consent. Assent was obtained from  
4  
5 participants 16 and 17 years of age.  
6

7  
8 Infants were not eligible for follow-up if they were born <33 completed weeks of gestation and/or  
9  
10 had a birthweight <2000 grams, significant medical or neurological condition, Down syndrome,  
11  
12 hydrocephalus, cerebral palsy, or significant visual or hearing impairment inconsistent with  
13  
14 neurocognitive testing.  
15

16  
17  
18 Main maternal and infant/child determinants included biological determinants: maternal  
19  
20 anthropometrics, blood pressure, hemoglobin, liver and kidney function, fetal and postnatal growth  
21  
22 characteristics and health status, heavy metals (blood and hair), pesticides (urine), telomere length  
23  
24 (buccal swab) and medication use; environmental determinants: maternal and child diet and  
25  
26 exposure history; social determinants: ethnicity, social support, trauma, prenatal life events,  
27  
28 maternal education, household income, employment status, and marital status. Main maternal and  
29  
30 infant/child outcomes were growth and physical development: pregnancy complications, fetal and  
31  
32 postnatal growth patterns, risk factors for maternal liver and renal impairment; behavior and  
33  
34 cognitive development: infant neuromotor development, autism spectrum disorder and  
35  
36 neuropsychological development; childhood diseases: infectious diseases, respiratory and  
37  
38 neurological disorders; health and healthcare: impact of mobile health technology-enabled CHWs  
39  
40 on prenatal health and birth outcomes, quality of life assessments and the impact of health care  
41  
42 system utilization on prenatal health and birth outcomes.  
43  
44  
45  
46  
47  
48  
49  
50  
51

## 52 **Data management & statistical plan**

53  
54  
55  
56  
57

1  
2  
3 The CCREOH field team was trained in administering all questionnaires. Data from administered  
4 questionnaires are recorded on secure, encrypted iPads, uploaded and managed using REDCap,  
5 which serves as the study electronic, integrated data management system [19]. Data collected  
6 through iPads by the field team are uploaded in REDCap's training site for data cleaning prior to  
7 integrating questionnaire and biospecimen data. Data records are maintained to examine trends on  
8 source of errors, duplicate records are scrubbed, and accuracy is validated through cross-checks  
9 with original data files and medical records. A comprehensive biospecimen tracking system tracks  
10 analyzed samples and the study's overall biospecimen repository. Communication of data updates  
11 and changes in the process are delivered through emails as well as during bimonthly meetings of  
12 the data management team. The data management platform allows for the interrogation of  
13 environmental, non-biospecimen and biospecimen data in an integrated fashion to facilitate  
14 scientific inquiries associated with the impact of exposures to complex mixtures of chemical and  
15 non-chemical stressors on pregnancy, birth outcomes and neurodevelopment.  
16  
17  
18  
19  
20  
21  
22  
23  
24  
25  
26  
27  
28  
29  
30  
31  
32

33 The data management team develops de-identified data files upon request of CCREOH  
34 investigators as specified by a standardized data request form. Statistical analyses are tailored to  
35 the specific research question. Frequency analyses are used for descriptive statistics and presented  
36 as means with standard deviations or median with interquartile range for continuous variables and  
37 proportions for categorical variables. Associations between categorical variables are studied using  
38 crosstabs; bivariate linear and logistic regression models are computed to study crude and  
39 independent associations, respectively. Comparison between study sites will primarily be analyzed  
40 by comparing participants, but can also be clustered depending on the research question.  
41  
42  
43  
44  
45  
46  
47  
48  
49  
50  
51  
52  
53  
54  
55  
56  
57  
58  
59  
60

## Data Collection

Maternal data were collected during pregnancy at two timepoints (trimester 1 or 2, and 3). Post-partum assessments are ongoing and target both mothers and children: biomarker and questionnaire data are collected from mothers during the child's neurodevelopmental testing at 12, 24, 36, and 48 months. (Table 1).

### Data collection during pregnancy

#### *Questionnaires*

Table 1 provides a list of standardized validated questionnaires to assess both physiological and psychosocial prenatal health. All questionnaires were translated into Dutch and other local languages to address the multiple language needs of our interior subcohort. The main categories of data collected from maternal participants were health status, demographics, reproductive health history, social support, trauma history, exposure history, depression, perceived stress, prenatal life events, health behavior, access to prenatal care, social status and diet. Questions on health behavior were adapted from the Alcohol, Smoking and Substance Involvement Screening Test version 3 (ASSIST V3.0) that was developed for the World Health Organization (WHO). Information on maternal diet was obtained by adapting the CDC's National Health and Nutrition Examination Survey (NHANES) into a culturally tailored dietary survey focusing on fish and produce consumption, including frequency of intake and portion sizes.

#### *Biospecimen collection*

1  
2  
3 The study's biospecimen repository, housed at the Academic Hospital Paramaribo's (AZP) clinical  
4 laboratory, contains 12,000 samples. All biospecimens are collected at study site hospitals and  
5  
6 laboratory, contains 12,000 samples. All biospecimens are collected at study site hospitals and  
7  
8 shipped to the AZP laboratory using established chain-of-custody procedures. Samples collected  
9  
10 from participants in remote areas were stored at 4°C for no more than 48 hours prior to delivery  
11  
12 and processing at the Academic Hospital Paramaribo clinical laboratory. Blood, serum, plasma,  
13  
14 and cord blood samples were aliquoted into 2 ml plastic freezer tubes and stored at -80°C.

15  
16  
17 400 frozen whole blood samples were shipped for analysis to the Wisconsin State Laboratory of  
18  
19 Hygiene Trace Element Research Laboratory. A chain-of-custody approach was used to ensure  
20  
21 samples were collected, maintained, processed, stored, shipped, and received according to  
22  
23 acceptable standards. Quality assurance/quality control (QA/QC) procedures for elemental  
24  
25 analyses and methylmercury analyses included reagent blanks, blank spikes (lab fortified blanks),  
26  
27 sample matrix spikes, ongoing precision and recovery spikes, second source spikes, sample matrix  
28  
29 duplicates, and external standard reference materials. All sample and QA/QC results were within  
30  
31 the acceptable recovery limits. Duplicates for all runs were within the acceptable relative percent  
32  
33 difference (%RPD) limits.

34  
35  
36  
37  
38 In these 400 maternal whole blood samples (200 Paramaribo, 100 Nickerie, and 100 interior  
39  
40 communities), we analyzed Pb, Hg, Cd, Al, Mn, Tn, Se, and Fe using inductively coupled plasma-  
41  
42 mass spectrometry (ICP-MS) or cold vapor atomic fluorescence spectrometry (CVAFS). Total Hg  
43  
44 and methylmercury using CVAFS was assessed in a small subset of women (20-Paramaribo, 20-  
45  
46 Nickerie, and 35-interior) to specify exposure sources.

47  
48  
49  
50  
51 Maternal hair samples were taken according to the following protocol: 1.5 gram of hair was cut as  
52  
53 close as possible to the hair roots with disinfected scissors and placed in patient coded ziplock  
54  
55 bags, stored at room temperature in a climate-controlled room and sent to the National Zoological  
56  
57

1  
2  
3 Collection of Suriname/Center for Environmental Research lab at the Anton de Kom University  
4 of Suriname (NZCS/CMO) for total mercury analysis using Cold Vapour Atomic Absorption  
5 Spectrometry (CVAAS).  
6  
7  
8  
9  
10  
11  
12

### 13 *Urine collection for pesticides analyses*

14  
15  
16 Urine samples from pregnant women were analyzed (subcohort N=218) from all three study sites.  
17 Urine samples were aliquoted into 10 ml plastic tubes, stored at -20°C and shipped for analysis by  
18 CDC's environmental health laboratory using well-established protocols. The six dialkylphosphate  
19 metabolites were measured using a modified method of Jayatilaka et al. [20] by solid phase  
20 extraction high performance liquid chromatography-tandem mass spectrometry<sup>1</sup>. The eight  
21 specific urinary metabolites were analyzed using a semi-automated solid phase extraction mass  
22 spectrometry method and reversed-phase high performance liquid chromatography [21]. The  
23 analysis panel consisted of dialkylphosphate metabolites of organophosphate pesticides (DAP's)  
24 including dimethylphosphate, diethylphosphate, dimethylthiophosphate,  
25 dimethyldithiophosphate, diethylthiophosphate, and diethyldithiophosphate, and a universal panel  
26 (UP) including 1 herbicide (2,4D) and its metabolite, 2,4-dichlorophenoxyacetic acid; 4 OP  
27 insecticide metabolites (3,5,6-trichloro-2-pyridinol,2-isopropyl-4-methyl-6-  
28 hydroxypyrimidine,para-nitrophenol, malathion dicarboxylic acid) and 3 pyrethroid metabolites  
29 (4-fluoro-3-phenoxybenzoic acid, 3-phenoxybenzoic acid, trans-3-(2,2-dichlorovinyl)-2,2-  
30 dimethylcyclopropane carboxylic acid).  
31  
32  
33  
34  
35  
36  
37  
38  
39  
40  
41  
42  
43  
44  
45  
46  
47  
48  
49  
50  
51  
52  
53  
54

### 55 **Data collection from birth through 48 months**

1  
2  
3 At birth, a cord blood sample was taken from infants for measurements of heavy metals. In case a  
4 cord blood sample was not available, a blood sample was taken by heel prick shortly after birth.  
5  
6 Baseline characteristics of all live births (e.g. gender, weight, gestational age, and Apgar score)  
7  
8 were collected (Table 2). At each subsequent data collection timepoint (Table 1), the child's  
9  
10 growth is measured and a blood sample is taken for heavy metal measurement. In addition, the  
11  
12 child's health status is obtained through questionnaires on diet and history of infectious diseases,  
13  
14 and respiratory and neurological disorders.  
15  
16  
17  
18  
19  
20  
21  
22

### 23 *Buccal swab collection for telomere assessments*

24  
25 Evidence exists that telomere length (TL) is a marker of cellular aging and links TL to negative  
26  
27 health outcomes including diabetes, cardiovascular disease and cognitive decline with aging.  
28  
29 Oxidative stress and DNA methylation, among other factors, influence TL. As and pesticide  
30  
31 exposure have both been linked to altered DNA methylation, while evidence also suggests a link  
32  
33 between Hg and elevated oxidative stress [22-26]. TL may reflect multiple biological pathways  
34  
35 through which environmental toxins influence child health and development and potentially may  
36  
37 be an earlier indicator of exposure. Buccal swabs are collected to extract DNA and analyze TL  
38  
39 prenatally in mothers and in children at 12, 24, 36, and 48 months of age. The average relative TL,  
40  
41 represented by the telomere repeat copy number to single gene (albumin) copy number (T/S) ratio,  
42  
43 is determined with monochrome multiplex quantitative real-time PCR using a BioRad CFX96  
44  
45  
46  
47  
48  
49 [27].  
50  
51  
52  
53  
54

### 55 *Behavior and cognitive development*



1  
2  
3 Neurodevelopmental assessments include infant cognitive and motor development and behavior  
4 at 12- 27 months using the Bayley Scales of Infant Development as well as an assessment of  
5 cognitive and social-emotional development at 36 months, and measurement of executive function  
6 at 48 months (Table 1). The Bayley assessment was administered by a team of trained  
7 psychologists, psychiatrists, and members of the study team specifically trained to administer the  
8 test. Data checking following data entry of each Bayley sub-scale is being conducted by other team  
9 members. Administration of Bayley assessments will be completed by May 2020. Assessments at  
10 36 and 48 months will take place as the cohort ages.  
11  
12  
13  
14  
15  
16  
17  
18  
19  
20  
21  
22  
23  
24  
25

## 26 **Patient and public involvement**

27  
28  
29 The CCREOH/ MeKiTamara cohort study was preceded by a planning grant which included a  
30 pilot fish assessment study as well as an initial hair mercury assessment among communities in  
31 the interior which required approval from the village Chiefs or Tribal captains. This community  
32 engagement component provided us a rich foundation to build on as we developed the research  
33 questions. The initial study design was revised based on guidance from an External Scientific  
34 Advisory Board (EAB) and a multi-stakeholder Community Advisory Board (CAB). For example,  
35 the CAB was instrumental in urging the study team to lower the inclusion age to 16 years since  
36 many women in the interior conceive at an earlier age. The CAB consists of respected leaders  
37 representing organizations from the interior tribal and indigenous peoples, midwives, general  
38 practitioners and environmentalists. The EAB members represent medical directors and other  
39 clinicians of all participating hospitals, representatives from the Ministry of Health, the US  
40 Embassy, the Pan American Health Organization and the Caribbean Public Health Agency  
41  
42  
43  
44  
45  
46  
47  
48  
49  
50  
51  
52  
53  
54  
55  
56  
57  
58  
59  
60

1  
2  
3 (CARPHA). Both advisory boards are convened annually to inform and give updates about the  
4 study progress and results, and to seek advice on future directions and dissemination of results.  
5  
6  
7  
8  
9  
10

### 11 **Dissemination of study results**

14 The study team is actively working with the EAB and the CAB on a collaborative translation and  
15 dissemination strategy of overall study results. However, every participant with neurotoxicant  
16 levels of imminent public health concern is contacted by the study coordinator and asked to repeat  
17 the test for confirmation. If the level remains of concern, the participant is referred to her attending  
18 physician according to the study's formal health care provider referral protocol. Children that are  
19 found to have a neurodevelopmental delay are referred to a child psychologist for further  
20 evaluation. Participants and the general public were invited to multiple health fairs, meetings and  
21 conferences, where the researchers discussed the study in a broader context, provided updates on  
22 the latest results and answered questions. Additionally, a Facebook page was created for study  
23 participants and others interested in this study, with general information on exposure to heavy  
24 metals and pesticides as well as the opportunity to ask questions of the research team and provide  
25 feedback about the study. Periodic briefings were also provided to officials of the Suriname's  
26 Ministry of Health. CCREOH data have been presented at multiple local, regional, and  
27 international conferences, including CARPHA, the International Society of Environmental  
28 Epidemiology, the Consortium for Universities in Global Health, the American Public Health  
29 Association and at scientific meetings convened by the US NIH.  
30  
31  
32  
33  
34  
35  
36  
37  
38  
39  
40  
41  
42  
43  
44  
45  
46  
47  
48  
49  
50  
51  
52  
53  
54

### 55 **Findings to date**

1  
2  
3 From December 2016 until December 2018, 1067 pregnant women were enrolled; 76 (7.1%) were  
4 ineligible (Figure 2). In comparison to participants, non-participants were more often of Creole  
5 and Tribal ethnicity, lived in Paramaribo, and had lower household income. Table 2 presents  
6 baseline maternal characteristics: one in eight women was 16-19 years of age, ethnic distribution  
7 was representative of the Surinamese population, and more than half had no or lower  
8 vocational/secondary education level.  
9

10  
11 Of the 898 babies born, 827 were enrolled (92%). Initial neurodevelopmental assessments using  
12 the Bayley instrument at 12-27 months in 824 infants are being analyzed. To date, the total number  
13 of biospecimens collected from 1067 pregnant women include whole blood for trace elements  
14 (N=1994), whole blood collected in K2EDTA anticoagulant (N=1994), serum collected in serum  
15 separator tubes (N=1994), plasma (N=1994), urine (N=1980), buccal swabs (N=941), and hair  
16 (N=876). Cord blood (N=441), blood from heel prick (N=269), and buccal swabs (N=363) have  
17 been collected from 710 infants. All samples not yet analyzed are archived for future targeted and  
18 untargeted analyses. Available results include total mercury concentrations in hair from pregnant  
19 women, prenatal maternal depression and perceived stress, level of pesticides in produce, and  
20 dietary exposure to Hg in fish. Results of heavy metals in blood, urinary pesticide metabolites,  
21 telomere analysis, and neurodevelopmental assessments are pending.  
22  
23  
24  
25  
26  
27  
28  
29  
30  
31  
32  
33  
34  
35  
36  
37  
38  
39  
40  
41  
42  
43  
44  
45  
46

### 47 **Biological specimens**

48  
49 Total hair Hg was measured in 876 pregnant women from all three study sites. Overall, 39.1% of  
50 the women had elevated total mercury hair levels that exceeded the U.S. Environmental Protection  
51 Agency's (US EPA) action level [28]. For women from the interior, Nickerie and Paramaribo these  
52  
53  
54  
55  
56  
57

1  
2  
3 percentages were 95.8%, 26.3%, and 25.5% respectively. Results for median total Hg  
4 concentrations in hair from pregnant women from Paramaribo (N=522) were 0.64 µg/g hair  
5 (interquartile ranges (IQR) 0.36-1.09; range 0.00-7.12), from Nickerie (N=176) 0.73 µg/g (IQR  
6 0.45-1.05; 0.00-5.79) and the interior (N=178) 1.92 µg/g (IQR 1.92-7.39; 0.38-18.20). Pregnant  
7 women from the interior were exposed to high levels of Hg compared to women from the coastal  
8 area and thus fetal exposures are expected to be high. Most of these women are primarily exposed  
9 to methylmercury from consuming contaminated fish from local artisanal gold-mining activities  
10 [18,29]. Other possible sources of exposure may include active participation in or living very close  
11 to gold mining areas.  
12  
13  
14  
15  
16  
17  
18  
19  
20  
21  
22  
23

### 24 25 26 27 **Prenatal depression and perceived stress**

28  
29  
30 Depression and prenatal stress in 722 participants were assessed using the standardized Edinburgh  
31 Postnatal Depression Scale (EPDS) (cut off  $\geq 12$  for probable depression) and Cohen Perceived  
32 Stress Scale (cut off  $\geq 20$  for high stress) respectively. One in four (24.9%) pregnant study  
33 participants had EPDS scores indicative of probable depression. Three in ten participants had high  
34 stress levels and nearly half of these women had probable depression.  
35  
36  
37  
38  
39  
40  
41  
42  
43  
44

### 45 **Dietary exposure to pesticides**

46  
47 An assessment of Surinamese agricultural produce conducted by members of our study team found  
48 pesticide residues exceeding European Union maximum residue limits, including prohibited-  
49 worldwide endosulfan and lindane in the leafy vegetable tannia, *Xanthosoma brasiliense* [30]. An  
50 interviewer-assisted NHANES-based dietary survey of 522 participants showed that 98.2% of  
51  
52  
53  
54  
55  
56  
57

1  
2  
3 women reported consumption of leafy vegetables. Tannia was the most frequently consumed  
4 (89.3%); 36.5% of surveyed women had high intake rates of tannia ( $\geq 36$  gram/day) [31]. Tannia  
5  
6 is also a commonly used vegetable in baby food preparation in Suriname.  
7  
8  
9

### 10 11 12 13 **Dietary exposure to Hg in fish** 14

15  
16 One in four pregnant women in our cohort, and predominantly those living in the interior who rely  
17 heavily on local freshwater fish, have hair mercury levels exceeding those considered safe by the  
18 US EPA and the World Health Organization (WHO). The dietary questionnaire (n=990) showed  
19 overall fish consumption of 96.1%. Previous environmental assessments of most frequently  
20 consumed carnivorous fish by interior participants, specifically *Hoplias aimara*, *Serrasalmus*  
21 *rhombeus*, and *Cichla ocellaris*, showed high levels of Hg [29]. Respective consumption of these  
22 three carnivorous species was 44.4%, 19.3%, and 26.3%. Carnivorous fish consumption was  
23 greater among the subcohort (N=123) living in the interior: 89.4%, 67.5%, and 74.8%,  
24 respectively.  
25  
26  
27  
28  
29  
30  
31  
32  
33  
34  
35

36  
37 Polyunsaturated omega-3 fatty acids (PUFA-3) docosahexaenoic acid and eicosapentaenoic acid  
38 from fish consumption offer neuroprotective benefits during prenatal and pediatric development  
39 which could potentially counteract mercury neurotoxicity. To better inform fish consumption risk,  
40 fatty acids in fish muscle tissue were measured in samples (N=5 per species) of five freshwater  
41 and three marine fish species: freshwater species had higher levels of linoleic acid (2.0 vs. 0.2  
42 mg/g), alpha-linoleic acid (0.4 vs. 0.1 mg/g), arachidonic acid (3.0 vs. 1.5 mg/g), omega-6 fatty  
43 acids (6.5 vs. 2.3 mg/g) and lower levels of eicosapentaenoic acid (0.8 vs. 1.9 mg/g) compared to  
44 marine species. Frequent consumption of *Hoplias aimara*, a freshwater fish with high Hg and low  
45 PUFA-3 content, is likely to increase mercury exposure whereas consumption of *Plagioscion*  
46  
47  
48  
49  
50  
51  
52  
53  
54  
55  
56  
57

1  
2  
3 *squamosissimus*, a freshwater fish with high mercury and high PUFA-3, may have nutritional  
4  
5 benefits that outweigh mercury neurotoxicity. While freshwater species are a good source of these  
6  
7 nutrients, corresponding mercury content must be assessed and considered as well.  
8  
9

## 10 11 12 13 **Strengths and limitations**

14  
15  
16  
17 The CCREOH-MeKiTamara environmental epidemiologic study is the first to examine the  
18  
19 potential impact of complex environmental exposures on maternal and child health in Suriname  
20  
21 by a multi-disciplinary team of research scientists. The study's strengths include: 1) addressing  
22  
23 two high priority public health threats: the impact of Hg exposure from artisanal gold mining, and  
24  
25 pesticide exposure associated with agricultural practices; 2) inclusion in the cohort of two  
26  
27 vulnerable subpopulations: pregnant women and children; 3) the longitudinal follow up with  
28  
29 children until 48 months with built-in timepoints to assess neurodevelopmental outcomes; and 4)  
30  
31 a biospecimen bank of approximately 12,000 samples, providing the opportunity for future  
32  
33 analyses within the cohort. Moreover, a linked research training grant facilitates the training of  
34  
35 nine Surinamese PhD candidates with dissertation research embedded in the study, thereby  
36  
37 building critical in-country environmental health research capacity. Research dissemination  
38  
39 throughout the Caribbean region is implemented in collaboration with CARPHA.  
40  
41  
42  
43  
44

45  
46 The study team overcame two initial logistical challenges: 1) delayed recruitment and data  
47  
48 collection of the logistically difficult to reach subcohort in the interior region (N=200) was  
49  
50 ameliorated by additional team support onsite; and 2) delays in transporting interior biospecimens  
51  
52 rendered some early cord blood specimens not analyzable was corrected by collecting an additional  
53  
54 heelprick sample at birth.  
55  
56  
57

## Future plans

Culturally tailored fish consumption advisories are in development to reduce Hg exposure. Recent additional funding allows us to examine potentially beneficial neuroprotective factors such as selenium and dietary polyunsaturated fatty acids in fish that may counter the neurotoxic effects of mercury. To address the large scale and poorly regulated use of pesticides, we are also developing a pesticide literacy scale. Cohort-wide, we will undertake a comprehensive assessment of the neurodevelopmental outcomes of the children, and create a robust, sharable data management system of biospecimen and non-biospecimen data building on the current REDCap database.

## Acknowledgements

We would like to thank our recruiters Jeetendra Jitan, Nishaira Doerga, Gimradj Dwarka, Sue-Ann Sitaram, Devika Kalika, the Community Health Workers from Nickerie Lilian Singotiko, Henna Mawo, Karien Jodiwongso, Karishma Bhondoe, Jay Kalicharan, Bhairam Goberdan, Azeez Khodabaks, the midwives and laboratory personnel of the Academic Hospital Paramaribo, Diakonessenhuis Hospital, St. Vincentius Hospital, 's-Lands Hospital, Mungra Medical Centre, Regional Health Service clinics and Medical Mission Primary Health Care Suriname, the National Zoological Collection of Suriname/Center for Environmental Research staff, Sila Kisoensingh MSc, Dr. Richenel Ellecom and Dr. Melissa Middleton for their help during the pediatric neurodevelopment assessments, Arioene Vreedzaam for providing the study site map, and the

1  
2  
3 members of the External Advisory Board and Community Advisory Board for their guidance and  
4  
5 valuable advice.  
6  
7  
8  
9  
10

## 11 **Collaborators**

12  
13  
14  
15 We welcome collaboration with fellow researchers working on similar projects. Specific research  
16 proposals can be sent directly to the Principal Investigators Drs. Wilco Zijlmans  
17 ([cwrzijlmans@researchcentersuriname.org](mailto:cwrzijlmans@researchcentersuriname.org)) and Maureen Lichtveld ([mlichtve@tulane.edu](mailto:mlichtve@tulane.edu)).  
18  
19 Areas of collaboration include further environmental and biomarkers assessment of arsenic  
20  
21 exposure, occupational health risk assessments associated with mercury and pesticide exposure,  
22  
23 and exposomic analyses including metabolomic assessments.  
24  
25  
26  
27  
28  
29  
30  
31

## 32 **Author Contributions**

33  
34  
35 MYL, JKW, HHC, EWH, AS, SSD and WCWRZ designed and established the cohort. MSMO,  
36  
37 ADHM, EWH and AG participated in the design of the questionnaires. WCWRZ, MSMO, EB,  
38  
39 WBH, GKB, RR and MYL are responsible for the continued management of the cohort. AG, GKB,  
40  
41 RR, AG and FAW are actively involved with recruitment of participants and collection of non-  
42  
43 biospecimen data and biospecimens. JC, JR, PEO and GAL store, archive and analyze the  
44  
45 biomarker samples. ADHM, AS, MSMO, AG, MYL and WCWRZ are responsible for data  
46  
47 management. SSD, AWEG, RR and EB manage neurodevelopmental testing of babies. JKW, LFS,  
48  
49 CSA, SSD interpret all results. WCWRZ, JKW, HHC and MYL drafted and edited the manuscript.  
50  
51  
52 All authors critically reviewed and approved the final manuscript.  
53  
54  
55  
56  
57  
58  
59  
60



## **Funding**

Research reported in this publication was supported by the Fogarty International Center of the National Institutes of Health under Award Numbers: U01TW010087 and U2RTW010104. The content is solely the responsibility of the authors and does not necessarily represent the official views of the National Institutes of Health.

## **Competing interests**

None declared

## **Patient consent for publication**

Obtained

## **Ethical approval**

This study was IRB approved by both the Government of Suriname and the Tulane University, New Orleans, Louisiana, USA, to consent 1200 pregnant women and their singleton birth children.

## **Provenance and peer review**

1  
2  
3 Not commissioned; externally peer reviewed.  
4  
5  
6  
7  
8

## 9 **Data sharing statement**

10  
11  
12 MeKiTamara cohort data will be made publicly available upon publication of the results in  
13 scientific articles. Questionnaire, registry and biospecimen data could be made accessible in de-  
14 identified form after an application process that includes submission of a research plan that will  
15 undergo evaluation by the CCREOH scientific board and relevant research ethics committees.  
16  
17  
18  
19  
20  
21  
22 Currently, data is partially available since data collection is ongoing.  
23  
24  
25  
26  
27

## 28 **References**

- 29  
30  
31  
32 1. Lichtveld MY, Hawkins WB, Ouboter PE *et al.* A One Health approach to interdict  
33 environmental health threats in Suriname. *Ann Glob Health* 2016;82:444.  
34  
35  
36  
37 2. Silbergeld EK, Patrick TE. Environmental exposures, toxicologic mechanisms, and adverse  
38 pregnancy outcomes. *Am J Obstet Gynecol* 2005;192:S11-21.  
39  
40  
41  
42  
43 3. Ferguson KK, O'Neill MS, Meeker JD. Environmental contaminant exposures and preterm  
44 birth: a comprehensive review. *J Toxicol Environ Health B Crit Rev* 2013;16:69-113.  
45  
46  
47  
48 4. Wigle DT, Arbuckle TE, Turner MC *et al.* Epidemiologic evidence of relationships between  
49 reproductive and child health outcomes and environmental chemical contaminants. *J Toxicol*  
50  
51  
52  
53 *Environ Health B Crit Rev* 2008;11:373-517.  
54  
55  
56  
57

- 1  
2  
3 5. Lewis M, Worobey J, Ramsay DS *et al*. Prenatal exposure to heavy metals: effect on childhood  
4 cognitive skills and health status. *Pediatrics* 1992;89:1010-5.  
5  
6
- 7  
8 6. Burns CJ, McIntosh LJ, Mink PJ, Jurek AM, Li AA. Pesticide exposure and  
9 neurodevelopmental outcomes: Review of the epidemiologic and animal studies. *J Toxicol*  
10 *Environ Health B Crit Rev* 2013;16:127-283.  
11  
12
- 13 7. Eskenazi B, Kogut K, Huen K *et al*. Organophosphate pesticide exposure, PON1, and  
14 neurodevelopment in school-age children from the CHAMACOS study. *Environ Res*  
15 2014;134C:149-57.  
16  
17
- 18 8. Furlong MA, Engel SM, Barr DB, Wolff MS. Prenatal exposure to organophosphate pesticides  
19 and reciprocal social behavior in childhood. *Environ Int* 2014;70:125-31.  
20  
21
- 22 9. Quirós-Alcalá L, Alkon AD, Boyce WT *et al*. Maternal prenatal and child organophosphate  
23 pesticide exposures and children's autonomic function. *Neurotoxicology* 2011;32:646-55.  
24  
25
- 26 10. Rosas LG, Eskenazi B. Pesticides and child neurodevelopment. *Curr Opin Pediatr*  
27 2008;20:191-7.  
28  
29
- 30 11. Belles M, Albina ML, Sanchez DJ *et al*. Interactions in developmental toxicology: effects of  
31 concurrent exposure to lead, organic mercury, and arsenic in pregnant mice. *Arch Environ*  
32 *Contam Toxicol* 2002;42:93-8.  
33  
34
- 35 12. Callahan MA, Sexton K. If cumulative risk assessment is the answer, what is the question?  
36 *Environ Health Perspect* 2007;115:799-806.  
37  
38
- 39 13. Golding J, Rai D, Gregory S *et al*. Prenatal mercury exposure and features of autism: a  
40 prospective population study. *Mol Autism* 2018;9:30.  
41  
42  
43  
44  
45  
46  
47  
48  
49  
50  
51  
52  
53  
54  
55  
56  
57

- 1  
2  
3  
4  
5  
6  
7  
8  
9  
10  
11  
12  
13  
14  
15  
16  
17  
18  
19  
20  
21  
22  
23  
24  
25  
26  
27  
28  
29  
30  
31  
32  
33  
34  
35  
36  
37  
38  
39  
40  
41  
42  
43  
44  
45  
46  
47  
48  
49  
50  
51  
52  
53  
54  
55  
56  
57  
58  
59  
60
14. Valent F, Mariuz M, Bin M *et al.* Associations of prenatal mercury exposure from maternal fish consumption and polyunsaturated fatty acids with child neurodevelopment: a prospective cohort study in Italy. *J Epidemiol* 2013;23:360-70.
  15. Sapbamrer R, Hongsibsong S. Effects of prenatal and postnatal exposure to organophosphate pesticides on child neurodevelopment in different age groups: a systematic review. *Environ Sci Pollut Res Int* 2019;26:18267-90.
  16. Wang J, Wu W, Li H *et al.* Relation of prenatal low-level mercury exposure with early child neurobehavioral development and exploration of the effects of sex and DHA on it. *Environ Int* 2019;126:14-23.
  17. Results Eighth Population and Housing Census in Suriname (Volume 1) Demographic and Social Characteristics and Migration. *General Bureau of Statistic Studies in Suriname (ABS)* 2013.
  18. Ouboter PE, Landburg G, Satnarain GU *et al.* Mercury Levels in Women and Children from Interior Villages in Suriname, South America. *Int J Environ Res Public Health* 2018;15:1007.
  19. Harris PA, Taylor R, Minor BL *et al.* The REDCap consortium: Building an international community of software partners, *J Biomed Inform* 2019;95:1-10. doi: 10.1016/j.jbi.2019.103208
  20. Jayatilaka NK, Restrepo P, Williams L, *et al.* Quantification of three chlorinated dialkyl phosphates, diphenyl phosphate, 2,3,4,5-tetrabromobenzoic acid, and four other organophosphates in human urine by solid phase extraction-high performance liquid chromatography-tandem mass spectrometry. *Anal Bioanal Chem* 2017;409:1323-32.

- 1  
2  
3 21. Davis MD, Wade EL, Restrepo PR, *et al.* Semi-automated solid phase extraction method for  
4 the mass spectrometric quantification of 12 specific metabolites of organophosphorus  
5 pesticides, synthetic pyrethroids, and select herbicides in human urine. *Journal of*  
6 *Chromatography B.* 2013;929:18-26  
7  
8  
9  
10  
11  
12
- 13 22. Frencik RW, Blackburn E, Shannon K. The rate of telomere sequence loss in human leukocytes  
14 varies with age. *Proc Natl Acad Sci* 1998;95:5607-10.  
15  
16  
17
- 18 23. Lung FW, Chen NC, Shu BC. Genetic pathway of major depressive disorder in shortening  
19 telomeric length. *Psychiatr Genet* 2007;17:195-9.  
20  
21  
22
- 23 24. Von Zglinchi T. Oxidative Stress shortens telomeres. *Trends Biochem Sci* 2002;27:339-44.  
24  
25  
26
- 27 25. Gonzalo S, Jaco I, Fraga MF *et al.* DNA methyltransferases control telomere length and  
28 telomere recombination in mammalian cells. *Nat Cell Biol* 2006;8:416-24.  
29  
30  
31
- 32 26. Damjanovic AK, Yang Y, Glaser R *et al.* Accelerated telomere erosion is associated with a  
33 declining immune function of caregivers of Alzheimer's disease patients. *J Immunol*  
34 2007;179:4249-54.  
35  
36  
37  
38  
39
- 40 27. Cawthon RM. Telomere length measurement by a novel monochrome multiplex qualitative  
41 PCR method. *Nucleic Acids Res* 2009;37:e21.  
42  
43  
44
- 45 28. Mercury Study Report to Congress Volume V: Health Effects of Mercury and Mercury  
46 Compounds. Volume 5. United States Environmental Protection Agency; Washington, DC,  
47 USA: 1997;1-348.  
48  
49  
50  
51  
52  
53  
54  
55  
56  
57

- 1  
2  
3 29. Ouboter PE, Landburg GA, Quik JHM, Mol JHA, van der Lugt F. Mercury Levels in Pristine  
4 and Gold Mining Impacted Aquatic Ecosystems of Suriname, South America. *Ambio*  
5 2012;41:873-82.  
6  
7  
8  
9  
10  
11 30. Abdoel Wahid F, Wickliffe J, Wilson M *et al.* Presence of pesticide residues on produce  
12 cultivated in Suriname. *Environ Monit Assess* 2017;189:303.  
13  
14  
15  
16 31. F. Abdoel Wahid, A. D. Hindori-Mohangoo, M. Wilson *et al.* Dietary Exposure to Pesticides  
17 in Pregnant Surinamese Women. *Environ Health Perspect* 2018;  
18 <https://doi.org/10.1289/isesisee.2018.P01.2380>  
19  
20  
21  
22  
23  
24  
25  
26  
27  
28  
29  
30  
31  
32  
33  
34  
35  
36  
37  
38  
39  
40  
41  
42  
43  
44  
45  
46  
47  
48  
49  
50  
51  
52  
53  
54  
55  
56  
57  
58  
59  
60

**Table 1.** Assessments completed by the CCREOH-MeKiTamara Cohort with timeline

| Assessments                    | Trimester                        |                 | Birth | 12<br>mos | 24<br>mos | 36<br>mos | 48<br>mos |
|--------------------------------|----------------------------------|-----------------|-------|-----------|-----------|-----------|-----------|
|                                | 1 <sup>st</sup> /2 <sup>nd</sup> | 3 <sup>rd</sup> |       |           |           |           |           |
| <b>Mother</b>                  |                                  |                 |       |           |           |           |           |
| Obstetric history              | •                                | •               |       |           |           |           |           |
| Demographics                   | •                                |                 |       |           |           |           |           |
| Residency                      | •                                | •               |       |           |           |           |           |
| Anthropometrics                | •                                | •               |       |           |           |           |           |
| Marital status                 | •                                |                 |       |           |           |           |           |
| Ethnicity                      | •                                |                 |       |           |           |           |           |
| Occupation                     | •                                |                 |       |           |           |           |           |
| Education                      | •                                |                 |       |           |           |           |           |
| Income                         | •                                |                 |       |           |           |           |           |
| Household composition          | •                                |                 |       |           |           |           |           |
| Maternity care                 | •                                | •               |       |           |           |           |           |
| <b>Questionnaires</b>          |                                  |                 |       |           |           |           |           |
| SF 36 Health Survey            | •                                | •               |       |           |           |           |           |
| Social Support List            | •                                |                 |       |           |           |           |           |
| Brief Trauma Interview         | •                                | •               |       |           | •         | •         | •         |
| Cohen's Perceived Stress Scale | •                                | •               |       |           |           | •         | •         |
| Edinburgh Depression Scale     | •                                | •               |       |           | •         | •         | •         |
| ASSIST V3.0                    | •                                | •               |       |           | •         | •         | •         |
| Exposure History               | •                                |                 |       |           |           |           |           |
| Prenatal Life Events Scale     | •                                | •               |       |           |           |           |           |
| Subjective Social Status       | •                                | •               |       |           |           |           |           |
| Dietary Assessment             | •                                | •               |       |           |           |           |           |
| Family Environment Scale       |                                  |                 |       |           | •         | •         | •         |
| Parenting Stress Index         |                                  |                 |       |           | •         | •         | •         |
| <b>Biological samples</b>      |                                  |                 |       |           |           |           |           |
| Hair                           | •                                |                 |       |           |           |           |           |
| Blood                          | •                                | •               |       |           |           |           |           |
| Urine                          | •                                | •               |       |           |           |           |           |
| Buccal swab                    | •                                |                 |       |           |           |           |           |
| <b>At birth</b>                |                                  |                 |       |           |           |           |           |
| Mode of delivery               |                                  |                 | •     |           |           |           |           |
| Cord or heelprick blood sample |                                  |                 | •     |           |           |           |           |
| Birth outcomes                 |                                  |                 | •     |           |           |           |           |
| <b>Child development</b>       |                                  |                 |       |           |           |           |           |
| Physical examination           |                                  |                 |       | •         | •         | •         | •         |
| <b>Questionnaires</b>          |                                  |                 |       |           |           |           |           |
| General Health Questionnaire   |                                  |                 |       | •         | •         | •         | •         |
| M-CHAT                         |                                  |                 |       |           |           | •         |           |
| Child Behavior Checklist       |                                  |                 |       |           |           | •         | •         |
| Bayley SEQ                     |                                  |                 |       |           |           | •         |           |
| Ages and Stages Questionnaire  |                                  |                 |       |           |           | •         |           |

Neurodevelopmental tests

BSID-III

CANTAB

Biological samples

Buccal swab

Blood

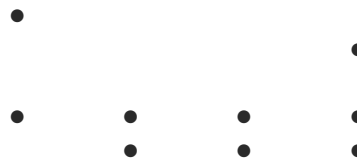

Notes: ASSIST V3.0 = Alcohol, Smoking and Substance Involvement Screening Test Version 3, Subjective Social Status = MacArthur Scale of Subjective Social Status, M-CHAT = Modified Checklist for Autism in Toddlers, Bayley SEQ = Bayley Social Emotional Questionnaire, BSID-III = Bayley Scales of Infant Development Third Edition, CANTAB = Cambridge Neuropsychological Test Automated Battery.

For peer review only



**Table 2.** Distribution of maternal and infant characteristics

| Maternal characteristics (N=1067) | N   | %    | Infant characteristics (N=898)              | N   | %    |
|-----------------------------------|-----|------|---------------------------------------------|-----|------|
| <u>Age at intake</u>              |     |      | <u>Gender</u>                               |     |      |
| 16-19 years                       | 133 | 12.4 | Male                                        | 461 | 52.3 |
| 20-24 years                       | 239 | 22.4 | Female                                      | 421 | 47.7 |
| 25-29 years                       | 280 | 26.2 | Missing                                     | 16  | 1.8  |
| 30-34 years                       | 252 | 23.6 | <u>Birth status</u>                         |     |      |
| 35-39 years                       | 129 | 12.1 | Live birth                                  | 863 | 96.1 |
| 40+ years                         | 34  | 3.2  | Stillbirth                                  | 35  | 3.9  |
| Missing                           | 0   | 0.0  | Missing                                     | 0   | 0.0  |
| <u>Parity</u>                     |     |      | <u>Birthweight</u>                          |     |      |
| 0 previous live births            | 344 | 33.0 | Low birthweight (<2500 g)                   | 113 | 12.9 |
| 1 previous live birth             | 298 | 28.6 | Normal birthweight (≥2500g)                 | 760 | 87.1 |
| 2 previous live births            | 174 | 16.7 | Missing                                     | 25  | 2.8  |
| 3 previous live births            | 102 | 9.8  | <u>Gestational age</u>                      |     |      |
| 4+ previous live births           | 124 | 11.9 | Miscarriages                                | 10  | 1.1  |
| Missing                           | 25  | 2.3  | Very preterm births (22+0-32+6 weeks)       | 36  | 4.1  |
| <u>Ethnicity</u>                  |     |      | Moderately preterm births (33+0-36+6 weeks) | 93  | 10.7 |
| Creole                            | 245 | 23.0 | Term births (≥37+0 weeks)                   | 733 | 84.1 |
| Hindustani                        | 222 | 20.8 | Missing                                     | 26  | 2.9  |
| Indigenous                        | 149 | 14.0 | <u>Apgar score at 5 minutes</u>             |     |      |
| Javanese                          | 94  | 8.8  | 0 - 6                                       | 46  | 5.2  |
| Tribal                            | 223 | 20.9 | 7 - 10                                      | 832 | 94.8 |
| Mixed                             | 128 | 12.0 | Missing                                     | 20  | 2.2  |
| Other                             | 5   | 0.5  |                                             |     |      |
| Missing                           | 1   | 0.1  |                                             |     |      |
| <u>Educational level</u>          |     |      |                                             |     |      |
| No or primary                     | 223 | 20.9 |                                             |     |      |
| Lower vocational/secondary        | 375 | 35.2 |                                             |     |      |
| Upper vocational/secondary        | 302 | 28.3 |                                             |     |      |

|                                     |     |      |
|-------------------------------------|-----|------|
| Tertiary                            | 166 | 15.6 |
| Missing                             | 1   | 0.1  |
| Household income SRD*               |     |      |
| <1500                               | 321 | 33.2 |
| 1500-2999                           | 330 | 34.1 |
| 3000-4999                           | 210 | 21.7 |
| 5000+                               | 106 | 11.0 |
| Missing                             | 100 | 9.4  |
| Marital status                      |     |      |
| Married or living with partner      | 922 | 86.8 |
| Not married/not living with partner | 140 | 13.2 |
| Missing                             | 5   | 0.5  |

---

\* SRD = Surinamese dollar, equivalent to 0.13 USD.

1  
2  
3 **Figure legends**  
4  
5  
6

7 **Figure 1.** CCREOH-MeKiTamara study area with recruitment sites from three regions of  
8 Suriname: 1) the capital Paramaribo 2) Nickerie, the major rice-producing region in western  
9 Suriname and 3) the tropical rainforest interior where mercury is used in artisanal gold mining.  
10  
11

12  
13 **Figure 2.** Flowchart with participant enrolment.  
14  
15  
16  
17  
18  
19  
20  
21  
22  
23  
24  
25  
26  
27  
28  
29  
30  
31  
32  
33  
34  
35  
36  
37  
38  
39  
40  
41  
42  
43  
44  
45  
46  
47  
48  
49  
50  
51  
52  
53  
54  
55  
56  
57  
58  
59  
60

For peer review only

1  
2  
3  
4  
5  
6  
7  
8  
9  
10  
11  
12  
13  
14  
15  
16  
17  
18  
19  
20  
21  
22  
23  
24  
25  
26  
27  
28  
29  
30  
31  
32  
33  
34  
35  
36  
37  
38  
39  
40  
41  
42  
43  
44  
45  
46  
47  
48  
49  
50  
51  
52  
53  
54  
55  
56  
57  
58  
59  
60

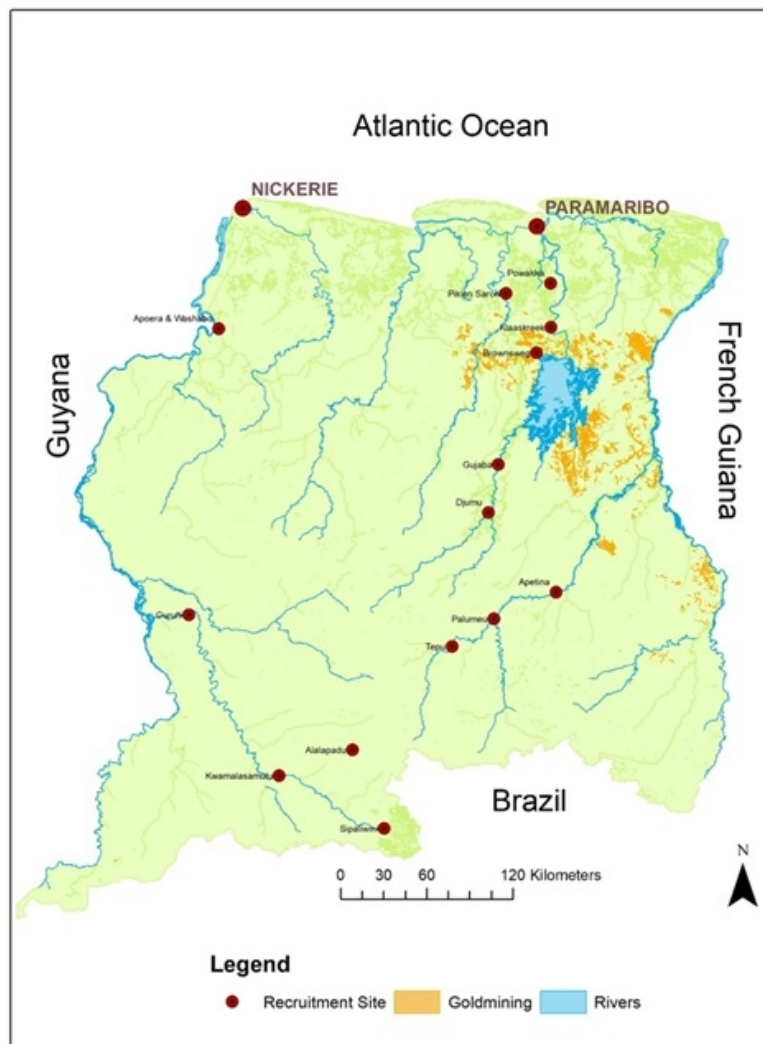

50x61mm (300 x 300 DPI)

1  
2  
3  
4  
5  
6  
7  
8  
9  
10  
11  
12  
13  
14  
15  
16  
17  
18  
19  
20  
21  
22  
23  
24  
25  
26  
27  
28  
29  
30  
31  
32  
33  
34  
35  
36  
37  
38  
39  
40  
41  
42  
43  
44  
45  
46  
47  
48  
49  
50  
51  
52  
53  
54  
55  
56  
57  
58  
59  
60

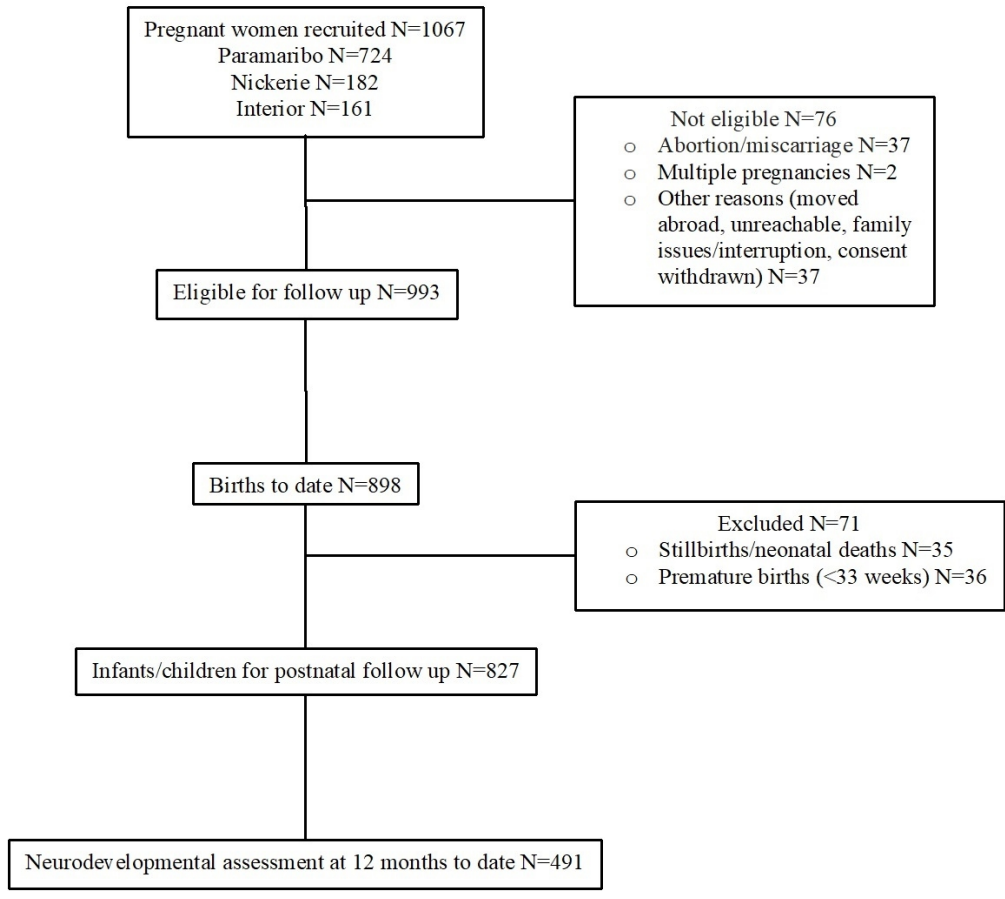

97x90mm (300 x 300 DPI)

# BMJ Open

## Cohort profile: The Caribbean Consortium for Research in Environmental and Occupational Health (CCREOH) Cohort Study: Influences of complex environmental exposures on maternal and child health in Suriname

|                                 |                                                                                                                                                                                                                                                                                                                                                                                                                                                                                                                                                                                                                                                                                                                                                                                                                                                                                                                                                                                                                                                                                                                                                                                                                                                                                                                                                                                                                                                                                                                                                                                                                                                                                                                         |
|---------------------------------|-------------------------------------------------------------------------------------------------------------------------------------------------------------------------------------------------------------------------------------------------------------------------------------------------------------------------------------------------------------------------------------------------------------------------------------------------------------------------------------------------------------------------------------------------------------------------------------------------------------------------------------------------------------------------------------------------------------------------------------------------------------------------------------------------------------------------------------------------------------------------------------------------------------------------------------------------------------------------------------------------------------------------------------------------------------------------------------------------------------------------------------------------------------------------------------------------------------------------------------------------------------------------------------------------------------------------------------------------------------------------------------------------------------------------------------------------------------------------------------------------------------------------------------------------------------------------------------------------------------------------------------------------------------------------------------------------------------------------|
| Journal:                        | <i>BMJ Open</i>                                                                                                                                                                                                                                                                                                                                                                                                                                                                                                                                                                                                                                                                                                                                                                                                                                                                                                                                                                                                                                                                                                                                                                                                                                                                                                                                                                                                                                                                                                                                                                                                                                                                                                         |
| Manuscript ID                   | bmjopen-2019-034702.R2                                                                                                                                                                                                                                                                                                                                                                                                                                                                                                                                                                                                                                                                                                                                                                                                                                                                                                                                                                                                                                                                                                                                                                                                                                                                                                                                                                                                                                                                                                                                                                                                                                                                                                  |
| Article Type:                   | Cohort profile                                                                                                                                                                                                                                                                                                                                                                                                                                                                                                                                                                                                                                                                                                                                                                                                                                                                                                                                                                                                                                                                                                                                                                                                                                                                                                                                                                                                                                                                                                                                                                                                                                                                                                          |
| Date Submitted by the Author:   | 08-Jun-2020                                                                                                                                                                                                                                                                                                                                                                                                                                                                                                                                                                                                                                                                                                                                                                                                                                                                                                                                                                                                                                                                                                                                                                                                                                                                                                                                                                                                                                                                                                                                                                                                                                                                                                             |
| Complete List of Authors:       | Zijlmans, Wilco; Anton de Kom University of Suriname Faculty of Medical Sciences, Pediatrics; Academic Hospital Paramaribo, Scientific Research Center Suriname<br>Wickliffe, Jeffrey; Tulane University, Global Environmental Health Sciences<br>Hindori-Mohangoo, Ashna; Perisur (Perinatal Interventions Suriname) Foundation<br>MacDonald-Ottevanger, Sigrid; Academic Medical Center, Amsterdam, The Netherlands<br>Ouboter, Paul; Institute for Neotropical Wildlife & Environmental Studies, Paramaribo, Suriname<br>Landburg, Gwendolyn; Anton de Kom University of Suriname, Paramaribo, Suriname, National Zoological Collection of Suriname/Center for Environmental Research<br>Codrington, John; Academic Hospital Paramaribo, Department of Clinical Chemistry<br>Roosblad, Jimmy; Academic Hospital Paramaribo<br>Baldewsingh, Gaitree; Medical Mission Primary Health Care Suriname<br>Ramjatan, Radha ; Regional Health Service<br>Gokoel, Anisma; Academic Hospital Paramaribo, Scientific Research Center Suriname<br>Abdoel Wahid, Firoz; Tulane University<br>Fortes Soares, Lissa; Tulane University<br>Alcala, Cecilia; Tulane University<br>Boedhoe, Esther; Academic Hospital Paramaribo<br>Grünberg, Antoon; Ministry of Health, Paramaribo, Suriname, Department of Public Health<br>Hawkins, William; Tulane University<br>Shankar, Arti; Tulane University<br>Harville, Emily; Tulane University School of Public Health, Epidemiology<br>Drury, SS; Department of Psychiatry and Behavioral Sciences, Tulane University<br>Covert, Hannah; Tulane University<br>Lichtveld, Maureen; Tulane University School of Public Health and Tropical Medicine, Global environmental health sciences |
| <b>Primary Subject Heading</b>: | Occupational and environmental medicine                                                                                                                                                                                                                                                                                                                                                                                                                                                                                                                                                                                                                                                                                                                                                                                                                                                                                                                                                                                                                                                                                                                                                                                                                                                                                                                                                                                                                                                                                                                                                                                                                                                                                 |

1  
2  
3  
4  
5  
6  
7  
8  
9  
10  
11  
12  
13  
14  
15  
16  
17  
18  
19  
20  
21  
22  
23  
24  
25  
26  
27  
28  
29  
30  
31  
32  
33  
34  
35  
36  
37  
38  
39  
40  
41  
42  
43  
44  
45  
46  
47  
48  
49  
50  
51  
52  
53  
54  
55  
56  
57  
58  
59  
60

|                            |                                                                                                                                                                                             |
|----------------------------|---------------------------------------------------------------------------------------------------------------------------------------------------------------------------------------------|
| Secondary Subject Heading: | Epidemiology, Global health, Public health                                                                                                                                                  |
| Keywords:                  | Community child health < PAEDIATRICS, Developmental neurology & neurodisability < PAEDIATRICS, PERINATOLOGY, PUBLIC HEALTH, Epidemiology < TROPICAL MEDICINE, Nutrition < TROPICAL MEDICINE |
|                            |                                                                                                                                                                                             |

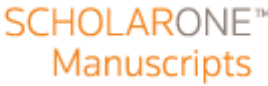



I, the Submitting Author has the right to grant and does grant on behalf of all authors of the Work (as defined in the below author licence), an exclusive licence and/or a non-exclusive licence for contributions from authors who are: i) UK Crown employees; ii) where BMJ has agreed a CC-BY licence shall apply, and/or iii) in accordance with the terms applicable for US Federal Government officers or employees acting as part of their official duties; on a worldwide, perpetual, irrevocable, royalty-free basis to BMJ Publishing Group Ltd ("BMJ") its licensees and where the relevant Journal is co-owned by BMJ to the co-owners of the Journal, to publish the Work in this journal and any other BMJ products and to exploit all rights, as set out in our [licence](#).

The Submitting Author accepts and understands that any supply made under these terms is made by BMJ to the Submitting Author unless you are acting as an employee on behalf of your employer or a postgraduate student of an affiliated institution which is paying any applicable article publishing charge ("APC") for Open Access articles. Where the Submitting Author wishes to make the Work available on an Open Access basis (and intends to pay the relevant APC), the terms of reuse of such Open Access shall be governed by a Creative Commons licence – details of these licences and which [Creative Commons](#) licence will apply to this Work are set out in our licence referred to above.

Other than as permitted in any relevant BMJ Author's Self Archiving Policies, I confirm this Work has not been accepted for publication elsewhere, is not being considered for publication elsewhere and does not duplicate material already published. I confirm all authors consent to publication of this Work and authorise the granting of this licence.



**Title:** Cohort profile: The Caribbean Consortium for Research in Environmental and Occupational Health (CCREOH) Cohort Study: Influences of complex environmental exposures on maternal and child health in Suriname

## Author list

Wilco C.W.R. Zijlmans<sup>\*1,2,3</sup>, Jeffrey K. Wickliffe<sup>2</sup>, Ashna D. Hindori-Mohangoo<sup>2,4</sup>, M. Sigrid MacDonald-Ottevanger<sup>1,5</sup>, Paul E. Ouboter<sup>2,6,7</sup>, Gwendolyn A. Landburg<sup>6</sup>, John Codrington<sup>8</sup>, Jimmy Roosblad<sup>8</sup>, Gaitree K. Baldewsingh<sup>3,9</sup>, Radha Ramjatan<sup>3,10</sup>, Anisma Gokoel<sup>1,3</sup>, Firoz Abdoel Wahid<sup>1,2</sup>, Lissa Fortes Soares<sup>2</sup>, Cecilia S. Alcalá<sup>2</sup>, Esther Boedhoe<sup>1</sup>, Antoon W.E. Grünberg<sup>4,11</sup>, William B. Hawkins<sup>2,12</sup>, Arti Shankar<sup>2</sup>, Emily W. Harville<sup>13</sup>, Stacy S. Drury<sup>14</sup>, Hannah H. Covert<sup>2</sup>, Maureen Y. Lichtveld<sup>2</sup>

## Affiliations

<sup>1</sup> Scientific Research Center Suriname, Academic Hospital Paramaribo, Paramaribo, Suriname

<sup>2</sup> Department of Environmental Health Sciences, School of Public Health and Tropical Medicine, Tulane University, New Orleans, LA 70112, United States of America

<sup>3</sup> Faculty of Medical Sciences, Anton de Kom University of Suriname, Paramaribo, Suriname

<sup>4</sup> Foundation for Perinatal Interventions and Research in Suriname (Perisur), Paramaribo, Suriname

1  
2  
3<sup>5</sup> Department of Clinical Chemistry Medical Microbiology, Academic Medical Center,  
4  
5  
6  
7  
8  
9  
10  
11  
12  
13  
14  
15  
16  
17  
18  
19  
20  
21  
22  
23  
24  
25  
26  
27  
28  
29  
30  
31  
32  
33  
34  
35  
36  
37  
38  
39  
40  
41  
42  
43  
44  
45  
46  
47  
48  
49  
50  
51  
52  
53  
54  
55  
56  
57  
58  
59  
60

Amsterdam, The Netherlands

<sup>6</sup>National Zoological Collection of Suriname/Center for Environmental Research, Anton de Kom  
University of Suriname, Paramaribo, Suriname

<sup>7</sup> Institute for Neotropical Wildlife & Environmental Studies, Paramaribo, Suriname

<sup>8</sup> Department of Clinical Chemistry, Academic Hospital Paramaribo, Paramaribo, Suriname

<sup>9</sup> Medical Mission Primary Health Care Suriname, Paramaribo, Suriname

<sup>10</sup> Regional Health Service Nickerie, Suriname

<sup>11</sup> Department of Public Health, Ministry of Health, Paramaribo, Suriname

<sup>12</sup> Department of Health Policy, Vanderbilt University Medical Center, Nashville, TN, United  
States of America

<sup>13</sup> Department of Epidemiology, Tulane University School of Public Health and Tropical  
Medicine, New Orleans, LA, United States of America

<sup>14</sup> Tulane University School of Medicine, New Orleans, LA, United States of America

\*Corresponding author. Scientific Research Center Suriname, Academic Hospital Paramaribo,  
Picornistreet 11, Paramaribo, Suriname. Email: [cwrzijlmans@researchcentersuriname.org](mailto:cwrzijlmans@researchcentersuriname.org)

## Abstract

**Purpose:** The Caribbean Consortium for Research in Environmental and Occupational Health (CCREOH) prospective environmental epidemiologic cohort study addresses the impact of complex chemical and non-chemical environmental exposures in mother/child dyads in Suriname.

The study determines associations between levels of environmental elements and toxicants in pregnant women and birth outcomes and neurodevelopment in the child cohort.

**Participants:** From December 2016 until July 2019, biomarker data on hair, blood, urine, buccal swab and questionnaire data on physiological and psychosocial prenatal health were collected from 1143 enrolled pregnant women, neurodevelopmental assessments were completed in 832 of 992 eligible infants.

**Findings to date:** 39.1% of participants had hair mercury (Hg) levels exceeding values considered safe by international standards. Median Hg concentrations in women from Paramaribo (N=522) were 0.64µg/g hair (interquartile ranges (IQR) 0.36-1.09; range 0.00-7.12), from Nickerie (N=176) 0.73µg/g (IQR 0.45-1.05;0.00-5.79) and the interior (N=178) 3.48µg/g (IQR 1.92-7.39;0.38-18.20). 96.1% participants ate fish, respective consumption of the three most consumed carnivorous species *Hoplias aimara*, *Serrasalmus rhombeus*, and *Cichla ocellaris* was 44.4%, 19.3%, and 26.3%, and was greater among the interior subcohort: 89.4%, 67.5%, and 74.8% respectively; 89% frequently consumed the vegetable tannia, samples of which showed presence

1  
2  
3 of worldwide banned pesticides; 24.9% had high Edinburgh Postnatal Depression Scale scores  
4  
5  
6 indicative of probable depression.  
7

8  
9 **Future plans:** Culturally tailored fish consumption advisories are in development, especially  
10  
11 relevant to interior women for whom fish consumption is the primary source of mercury exposure.  
12  
13  
14 Research is ongoing to examine effects of potentially beneficial neuroprotective factors in fish that  
15  
16 may counter neurotoxic effects of mercury. A pesticide literacy assessment in pregnant Surinamese  
17  
18 women is in progress. Long-term effects of exposures to toxicant mixtures in infants/toddlers are  
19  
20 being evaluated through neurodevelopmental assessments. Telomere length measurements of the  
21  
22 mothers and children as an indicator of prenatal exposure to environmental toxins are ongoing.  
23  
24  
25  
26  
27  
28  
29  
30  
31

32 **Keywords** environmental exposures, mercury, metal mixtures, pregnant women, pediatric  
33  
34 neurodevelopment, Suriname  
35  
36  
37  
38  
39  
40

41 **Word count** 3999 (excl. references, acknowledgements, tables & figures)  
42  
43  
44  
45  
46

### 47 **Strengths and limitations of this study**

48  
49

- 50 • The study addresses two high priority public health threats in Suriname and neighboring  
51 countries in the Guiana Shield: the impact of mercury exposure from artisanal gold mining  
52  
53  
54  
55  
56  
57

1  
2  
3 and pesticide exposure associated with agricultural practices in two vulnerable  
4 subpopulations: pregnant women and children younger than 5 years of age.  
5  
6

- 7  
8 • The longitudinal follow up of children to 48 months provides several timepoints to assess  
9 neurodevelopmental outcomes.  
10
- 11  
12 • The study has a biospecimen bank of approximately 13,000 samples, providing the  
13 opportunity for future biomarker analyses.  
14
- 15  
16 • A linked research training grant facilitates the training of nine Surinamese PhD candidates  
17 with dissertation research embedded in the study, thereby building critical in-country  
18 environmental health research capacity.  
19
- 20  
21 • The interior sub-cohort (N=200) was logistically difficult to reach, resulting in delayed  
22 recruitment of some women in the second or early third trimester of pregnancy, data  
23 collection and transport of cord blood specimens. This may limit our ability to understand  
24 differential effects of exposure across gestation for the interior cohort; heel prick sampling  
25 replaced cord blood collection at birth.  
26  
27  
28  
29  
30  
31  
32  
33  
34  
35  
36  
37  
38  
39

## 40 **Introduction**

41  
42  
43 The Caribbean Consortium for Research in Environmental and Occupational Health (CCREOH)  
44 addresses high-priority environmental and occupational health risks in Suriname and those  
45 common to the vulnerable Caribbean region, while preserving unique cultural traditions of  
46 indigenous people and other health disparate populations [1]. Exposure to environmental  
47 contaminants at levels of public health concern may adversely affect pregnancy, and pre- and  
48 postnatal health in multiple ways: miscarriage, preterm delivery, intra-uterine growth retardation,  
49  
50  
51  
52  
53  
54  
55  
56  
57

1  
2  
3 congenital anomalies, and behavioral and physical consequences in later developmental stages [2,  
4 3, 4]. Prenatal exposure to multiple heavy metals is associated with adverse pediatric health  
5 outcomes [5]. Pesticide exposure has been linked to fetal growth decrements and preterm birth,  
6 and there is mounting evidence that exposure to pesticides during pre- and postnatal development  
7 is associated with neurodevelopmental deficits in young children [6-10]. Exposure to contaminant  
8 mixtures can exacerbate adverse health effects: e.g. lead, arsenic, and mercury (Hg) can potentiate  
9 each other's toxicity, even at individual levels below concentration expected to result in adverse  
10 effects [11]. Despite this knowledge, no cumulative risk assessments have been conducted to date  
11 addressing exposures to contaminant mixtures in Caribbean Low- and Middle-Income Countries  
12 [12].  
13  
14  
15  
16  
17  
18  
19  
20  
21  
22  
23  
24  
25

26  
27 The CCREOH- environmental epidemiology cohort study fills this gap by exploring the impact of  
28 exposures to organic and inorganic neurotoxins, including Hg, lead and multiple  
29 organophosphate pesticides, on Surinamese pregnant women and their offspring using a  
30 cumulative risk approach. Specifically, the study assesses the impact of exposures to chemical and  
31 non-chemical stressors by examining the interaction between exposure to environmental chemicals  
32 and social and psychological determinants of early neurodevelopment. Few prospective studies  
33 have measured exposure prenatally through 48 months in mother/child dyads, and those that have  
34 showed contrasting results when evaluating executive function, a key neurodevelopmental  
35 outcome [13-16]. Our hypothesis is that environmental exposures to mixtures of  
36 neurodevelopmental toxicants and non-chemical stressors will result in increased adverse birth  
37 outcomes and poorer child neurodevelopmental trajectories. Our research aims are to:  
38  
39  
40  
41  
42  
43  
44  
45  
46  
47  
48  
49  
50  
51

- 52 • Identify exposures to a complex mixture of environmental elements and toxicants,  
53 including Hg, lead, cadmium, aluminum, iron, manganese, tin, selenium and selected  
54  
55  
56  
57

1  
2  
3 pesticides through comprehensive dietary and environmental risk assessments, and  
4  
5 biomarker monitoring in Surinamese pregnant women and their offspring;

- 6  
7
- 8 • Assess levels of environmental elements and toxicants in fish, produce, rice, and  
9  
10 nutraceutical compounds;
  - 11 • Determine the association between levels of environmental elements and toxicants in  
12  
13 pregnant women and birth outcomes;
  - 14 • Assess the impact of mobile health technology-enabled community health workers  
15  
16 (CHWs) on birth outcomes and their associations with environmental contaminants;
  - 17 • Determine associations between prenatal, dietary, and environmental levels of elements  
18  
19 and toxicants and potential neuroprotective nutraceuticals on neurodevelopment.  
20  
21  
22  
23  
24  
25

26  
27 CCREOH is funded by the Fogarty International Center at the US National Institutes of Health  
28  
29 (NIH).  
30  
31  
32  
33  
34  
35

## 36 **Cohort description**

### 37 38 39 **Study area**

40  
41  
42 The Republic of Suriname is located on the northeastern coast of South America, bordered  
43  
44 by Brazil, Guyana, French Guiana, and the Atlantic Ocean. 90% of the population of 590,549  
45  
46 people live in the capital Paramaribo and the coastal area. The remainder live in the tropical  
47  
48 rainforest interior (90% of the landmass). Suriname's multi-ethnic population consists of five main  
49  
50 groups: Hindustani (27%), Tribal (22%), Creole (16%), Javanese (14%), and Indigenous (4%)  
51  
52 [17].  
53  
54  
55  
56  
57  
58  
59  
60

## Recruitment

Pregnant women potentially exposed to complex environmental chemical- and non-chemical stressors were recruited from three regions of Suriname: (1) Paramaribo, where pesticides are primarily used for residential purposes; (2) Nickerie, the major rice producing region in western Suriname where pesticide use is abundant; and (3) the tropical rainforest interior, where Hg is used in artisanal gold mining and the population is highly dependent on consumption of contaminated fish [18]. Taking into account a potential 20% lost to follow up, we requested and were approved to consent 1200 pregnant women and their singleton birth children by the Institutional Review Boards of both the Government of Suriname and Tulane University.

85% of all deliveries in Suriname are hospital-based, with the remainder (14%) taking place in primary health care clinics under the supervision of a general practitioner or midwife at the Regional Health Department or a skilled healthcare worker at the Medical Mission Primary Health Care Suriname; a small proportion (1%) occurs at home. Recruitment sites included all hospitals and clinics of the Regional Health Department in Paramaribo and Nickerie and the Medical Mission Primary Health Care Suriname in the interior. In Nickerie, trained CHWs were integrated in the research team and played a key role in every aspect of the study, from recruitment to assessments at every study time point prenatally and during the neurodevelopmental assessments of the child cohort. Women who met the inclusion criteria were identified by their physician, midwife, CHW or health assistant during regular prenatal appointments and invited to participate. Inclusion criteria were: pregnant women 16 years or older; speaking Dutch, Sranan Tongo, Sarnami, Saramaccan or Trio; singleton gestation; planning to deliver at one of the study hospitals, prenatal clinics or midwife facilities associated with those hospitals or clinics; and signed informed



1  
2  
3 consent. Assent was obtained from participants aged 16 and 17 years. Informed consent forms and  
4  
5 questionnaires were translated into the local languages Sranan Tongo, Sarnami, Saramaccan or  
6  
7 Trio. If a participant was unable to read, the recruiter read the questions in the local language.  
8  
9

10  
11 Infants were not eligible for follow-up if they were born before 33 completed weeks of gestation  
12  
13 and/or had a birthweight less than 2000 grams, significant medical or neurological condition,  
14  
15 Down syndrome, hydrocephalus, cerebral palsy, or significant visual or hearing impairment  
16  
17 inconsistent with neurocognitive testing.  
18  
19

20  
21 Main maternal and infant/child determinants included biological determinants: maternal  
22  
23 anthropometrics, blood pressure, hemoglobin, liver and kidney function, fetal and postnatal growth  
24  
25 characteristics and health status, heavy metals (blood and hair), pesticides (urine), telomere length  
26  
27 (buccal swab) and medication use; environmental determinants: maternal and child diet and  
28  
29 exposure history; social determinants: ethnicity, social support, trauma, prenatal life events,  
30  
31 maternal education, household income, household size, employment status, and marital status.  
32  
33

34  
35 Main maternal and infant/child outcomes were growth and physical development: pregnancy  
36  
37 complications, fetal and postnatal growth patterns, risk factors for maternal liver and renal  
38  
39 impairment; behavior and cognitive development: infant neuromotor development, autism  
40  
41 spectrum disorder and neuropsychological development; childhood diseases: infectious diseases,  
42  
43 respiratory and neurological disorders; health and healthcare: impact of mobile health technology-  
44  
45 enabled CHWs on prenatal health and birth outcomes, quality of life assessments and the impact  
46  
47 of health care system utilization on prenatal health and birth outcomes.  
48  
49  
50  
51  
52  
53

#### 54 **Data management & statistical plan**

55  
56  
57  
58  
59  
60

1  
2  
3 The CCREOH field team was trained in administering all questionnaires. Data from administered  
4 questionnaires are recorded on secure, encrypted iPads, uploaded and managed using REDCap,  
5  
6 which serves as the study electronic, integrated data management system [19]. Data are uploaded  
7  
8 in REDCap's training site for data cleaning prior to integrating questionnaire and biospecimen  
9  
10 data. Data records are maintained to examine trends on source of errors, duplicate records are  
11  
12 scrubbed, and accuracy is validated through cross-checks with original data files and medical  
13  
14 records obtained through the general practitioner, midwife, health assistant or hospital  
15  
16 administration. A comprehensive biospecimen tracking system tracks analyzed samples and the  
17  
18 study's overall biospecimen repository. Communication of data updates and changes in the process  
19  
20 are delivered through emails and during bimonthly data management team meetings. The data  
21  
22 management platform allows for the interrogation of environmental, non-biospecimen and  
23  
24 biospecimen data in an integrated fashion to facilitate scientific inquiries associated with the  
25  
26 impact of exposures to complex mixtures of chemical and non-chemical stressors on pregnancy,  
27  
28 birth outcomes and neurodevelopment.  
29  
30  
31  
32  
33  
34  
35

36 De-identified data files are developed upon request of CCREOH investigators through  
37  
38 standardized data request forms; statistical analyses are tailored to the specific research question.  
39  
40 Frequency analyses are used for descriptive statistics and presented as means with standard  
41  
42 deviations or median with interquartile range for continuous variables and proportions for  
43  
44 categorical variables. Associations between categorical variables are studied using crosstabs;  
45  
46 bivariate linear and logistic regression models are computed to study crude and independent  
47  
48 associations, respectively. Comparison between study sites will be analyzed by comparing  
49  
50 participants, or clustered depending the research question.  
51  
52  
53  
54  
55  
56  
57  
58  
59  
60

1  
2  
3 Multiple logistic regression analysis will be used to develop predictive models for binomial and  
4 multinomial variables, multiple linear regression to develop predictive models for continuous  
5 outcome variables, and nonparametric methods if assumptions are not met. Sample size was  
6 calculated based on a multiple linear regression model using a coefficient of determination of 0.10  
7 and a R-square differential of 0.02. Using these parameters, a number of 495 was needed to have  
8 an 80% power at a 0.05 level of significance. Multiple approaches to develop and compare models  
9 for multiple exposures to toxic metals will be used. In the first approach, we will use a Bayesian  
10 kernel machine regression, a nonparametric Bayesian variable selection framework that will allow  
11 us to explore joint (or combined) effects of the multiple chemicals. In the second approach,  
12 principal component analysis will be used to group correlated exposure variables using the  
13 principal component scores as the main exposure measures. Finally, we will use structural equation  
14 models to create latent constructs of similar exposure variables and then finding associations  
15 between these latent constructs and the outcome variable.  
16  
17  
18  
19  
20  
21  
22  
23  
24  
25  
26  
27  
28  
29  
30  
31  
32  
33  
34  
35  
36

## 37 **Data Collection**

38  
39 Maternal data were collected during pregnancy at two timepoints (first/second and third trimester).  
40  
41 Post- partum assessments are ongoing and target both mothers and children: biomarker and  
42 questionnaire data are collected from mothers during the child's neurodevelopmental testing at 12,  
43 36, and 48 months. (Table 1).  
44  
45  
46  
47  
48  
49  
50  
51  
52

### 53 **Data collection during pregnancy**

#### 54 *Questionnaires*

1  
2  
3 Table 1 provides a list of standardized validated questionnaires to assess both physiological and  
4  
5 psychosocial prenatal health. All questionnaires were translated into Dutch and other local  
6  
7 languages to address the multiple language needs of our interior sub-cohort. The main categories  
8  
9 of data collected from maternal participants were health status, demographics, reproductive health  
10  
11 history, social support, trauma history, exposure history, depression, perceived stress, prenatal life  
12  
13 events, health behavior, access to prenatal care, social status and diet. Questions on health behavior  
14  
15 were adapted from the Alcohol, Smoking and Substance Involvement Screening Test version 3  
16  
17 (ASSIST V3.0) that was developed for the World Health Organization (WHO). Information on  
18  
19 maternal diet was obtained by adapting the CDC's National Health and Nutrition Examination  
20  
21 Survey (NHANES) into a culturally tailored dietary survey focusing on fish and produce  
22  
23 consumption, including frequency of intake and portion sizes.  
24  
25  
26  
27  
28  
29  
30  
31

### 32 *Biospecimen collection*

33  
34  
35 The study's biospecimen repository, housed at the Academic Hospital Paramaribo's (AZP) clinical  
36  
37 laboratory, contains 13,000 samples. All biospecimens are collected at study site hospitals and  
38  
39 shipped to the AZP laboratory using established chain-of-custody procedures. Samples collected  
40  
41 from participants in remote areas were stored at 4°C for no more than 48 hours prior to delivery  
42  
43 and processing at the Academic Hospital Paramaribo clinical laboratory. Blood, serum, plasma,  
44  
45 and cord blood samples were aliquoted into 2 ml plastic freezer tubes and stored at -80°C.  
46  
47  
48

49  
50 400 frozen whole blood samples were shipped for analysis to the Wisconsin State Laboratory of  
51  
52 Hygiene Trace Element Research Laboratory. A chain-of-custody approach was used to ensure  
53  
54 samples were collected, maintained, processed, stored, shipped, and received according to  
55  
56  
57

1  
2  
3 acceptable standards. Quality assurance/quality control (QA/QC) procedures for elemental  
4 analyses and methylmercury analyses included reagent blanks, blank spikes (lab fortified blanks),  
5 sample matrix spikes, ongoing precision and recovery spikes, second source spikes, sample matrix  
6 duplicates, and external standard reference materials. All sample and QA/QC results were within  
7 the acceptable recovery limits. Duplicates for all runs were within the acceptable relative percent  
8 difference (%RPD) limits.  
9

10  
11  
12 In these 400 maternal whole blood samples (200 Paramaribo, 100 Nickerie, and 100 interior  
13 communities), we analyzed Hg, lead, cadmium, aluminum, manganese, tin, selenium and iron  
14 using inductively coupled plasma-mass spectrometry (ICP-MS) or cold vapor atomic fluorescence  
15 spectrometry (CVAFS). Total Hg and methylmercury using CVAFS were assessed in a small  
16 subset of women (20-Paramaribo, 20-Nickerie, and 35-interior) to specify exposure sources.  
17

18  
19  
20 Maternal hair samples were taken according to the following protocol: 1.5 gram of hair was cut as  
21 close as possible to the hair roots with disinfected scissors and placed in patient coded ziplock  
22 bags, stored at room temperature in a climate-controlled room and sent to the National Zoological  
23 Collection of Suriname/Center for Environmental Research lab at the Anton de Kom University  
24 of Suriname (NZCS/CMO) for total mercury analysis using Cold Vapour Atomic Absorption  
25 Spectrometry (CVAAS).  
26  
27  
28  
29

### 30 *Urine collection for pesticides analyses*

31  
32  
33 Urine samples from pregnant women were analyzed (sub-cohort N=218) from all three study sites.  
34  
35 Urine samples were aliquoted into 10 ml plastic tubes, stored at -20°C and shipped for analysis by  
36  
37 CDC's environmental health laboratory using well-established protocols. The six dialkylphosphate  
38  
39  
40  
41  
42  
43  
44  
45  
46

1  
2  
3 metabolites were measured using a modified method of Jayatilaka et al. [20] by solid phase  
4 extraction high performance liquid chromatography-tandem mass spectrometry<sup>1</sup>. The eight  
5 specific urinary metabolites were analyzed using a semi-automated solid phase extraction mass  
6 spectrometry method and reversed-phase high performance liquid chromatography [21]. The  
7 analysis panel consisted of dialkylphosphate metabolites of organophosphate pesticides (DAP's)  
8 including dimethylphosphate, diethylphosphate, dimethylthiophosphate,  
9 dimethyldithiophosphate, diethylthiophosphate, and diethyldithiophosphate, and a universal panel  
10 (UP) including 1 herbicide (2,4D) and its metabolite, 2,4-dichlorophenoxyacetic acid; 4 OP  
11 insecticide metabolites (3,5,6-trichloro-2-pyridinol, 2-isopropyl-4-methyl-6-hydroxypyrimidine,  
12 para-nitrophenol, malathion dicarboxylic acid) and 3 pyrethroid metabolites (4-fluoro-3-  
13 phenoxybenzoic acid, 3-phenoxybenzoic acid, trans-3-(2,2-dichlorovinyl)-2,2-  
14 dimethylcyclopropane carboxylic acid).

### 34 **Data collection from birth through 48 months**

35  
36  
37 At birth, a cord blood sample was taken from infants for measurements of heavy metals. In case a  
38 cord blood sample was not available, a blood sample was taken by heel prick shortly after birth.  
39  
40 Baseline characteristics of all births (e.g. gender, weight, gestational age, and Apgar score) were  
41 collected (Table 2). At each subsequent data collection timepoint (Table 1), the child's growth is  
42 measured and a blood sample is taken for heavy metal measurement. In addition, the child's health  
43 status is obtained through questionnaires on diet and history of infectious diseases, and respiratory  
44 and neurological disorders.  
45  
46  
47  
48  
49  
50  
51  
52  
53  
54  
55  
56  
57  
58  
59  
60

### *Buccal swab collection for telomere assessments*

1  
2  
3  
4  
5  
6 Isohelix SK1 buccal swabs (Cell Projects, Kent, United Kingdom) were used for the collection of  
7  
8 maternal and infant DNA for telomere length (TL) analyses. Swabs were air dried and then stored  
9  
10 with a dessicator pellet at 4 degrees until DNA is extracted. DNA is extracted using the QIAamp  
11  
12 DNA mini kit protocol (Qiagen, Valencia, CA) and stored at  $-80^{\circ}\text{C}$  until assayed. Concentration  
13  
14 of dsDNA is quantified with a Qubit dsDNA BR assay kit (Invitrogen, Carlsbad, CA), purity of  
15  
16 the DNA is determined by using a NanoDrop 1000 spectrophotometer (Thermo Fisher Scientific,  
17  
18 Waltham, MA), and DNA integrity is confirmed by gel electrophoresis to ensure high molecular  
19  
20 weight DNA [22]. The average relative TL, represented by the telomere repeat copy number to  
21  
22 single gene (albumin) copy number (T/S) ratio, is determined with monochrome multiplex  
23  
24 quantitative real-time PCR using a BioRad CFX96 [23]. All samples are run in triplicate on  
25  
26 duplicate plates with a standard curve and known controls.  
27  
28  
29  
30  
31  
32  
33  
34

### *Behavior and cognitive development*

35  
36  
37  
38 Neurodevelopmental assessments include infant cognitive and motor development and behavior  
39  
40 at 12-27 months using the Bayley Scales of Infant Development as well as an assessment of  
41  
42 cognitive and social-emotional development at 36 months, and measurement of executive function  
43  
44 at 48 months (Table 1). The Bayley assessment was administered by a team of trained  
45  
46 psychologists, psychiatrists, and members of the study team specifically trained to administer the  
47  
48 test. Data checking following data entry of each Bayley sub-scale is being conducted by other team  
49  
50 members. Administration of Bayley assessments will be completed by July 2020. Assessments at  
51  
52 36 and 48 months will take place as the cohort ages.  
53  
54  
55  
56  
57

## Data collection from fish

Previous assessments of carnivorous fish from different regions in the interior of Suriname showed high levels of Hg, specifically the frequently consumed species *Hoplias aimara* (0.43-0.66ug/g) and *Serrasalmus rhombeus* (0.23-1.38ug/g). These levels are well above international accepted standards and in certain regions, up to 7 times the norm for human consumption [24]. Polyunsaturated omega-3 fatty acids (PUFA-3) docosahexaenoic acid and eicosapentaenoic acid from fish consumption offer neuroprotective benefits during prenatal and pediatric development which could potentially counteract mercury neurotoxicity [25-27]. To better inform fish consumption risk, fatty acids in fish muscle tissue were measured in samples (N=5 per species) of five freshwater and three marine fish species.

## Patient and public involvement

The CCREOH cohort study was preceded by a planning grant which included a pilot fish assessment study as well as an initial hair mercury assessment among communities in the interior which required approval from the village Chiefs or Tribal captains. This community engagement component provided us a rich foundation to build on as we developed the research questions. The initial study design was revised based on guidance from an External Scientific Advisory Board (EAB) and a multi-stakeholder Community Advisory Board (CAB). The CAB consists of respected leaders representing organizations from the interior tribal and indigenous peoples, midwives, general practitioners and environmentalists. The EAB members represent medical directors and other clinicians of all participating hospitals, representatives from the Ministry of



1  
2  
3 Health, the US Embassy, the Pan American Health Organization and the Caribbean Public Health  
4 Agency (CARPHA). Both advisory boards are convened annually to inform and give updates  
5  
6 about the study progress and results, and to seek advice on future directions and dissemination of  
7  
8 results.  
9  
10

### 11 12 13 14 15 16 **Dissemination of study results** 17

18  
19 The study team is actively working with the EAB and CAB on a collaborative translation and  
20 dissemination strategy of overall study results. Every participant with neurotoxicant levels of  
21 imminent health concern is contacted and asked to repeat the test for confirmation. If the level  
22 remains of concern, the participant is referred to her attending physician. Children with  
23 neurodevelopmental delay are referred to a child psychologist. Participants and the general public  
24 were invited to health fairs, meetings and conferences, where study results were presented and  
25 discussed. CCREOH data have been presented at regional and international conferences, including  
26 CARPHA, the International Society of Environmental Epidemiology, the Consortium for  
27 Universities in Global Health, the American Public Health Association and at scientific meetings  
28 convened by the US NIH.  
29  
30  
31  
32  
33  
34  
35  
36  
37  
38  
39  
40  
41  
42  
43  
44  
45

### 46 **Findings to date** 47 48

49 From December 2016 until July 2019, 1143 pregnant women were enrolled; 74 (6.5%) were  
50 ineligible (Figure 1). Geographically, 738 women were enrolled in Paramaribo, 204 in Nickerie,  
51 and 201 in the interior. In comparison to participants, non-participants were more often of Creole  
52  
53  
54  
55  
56  
57

1  
2  
3 and Tribal ethnicity, lived in Paramaribo, and had lower household income. Table 2 presents  
4  
5 baseline maternal characteristics: one in eight women was 16-19 years of age, ethnic distribution  
6  
7 was representative of the Surinamese population, and more than half had no or lower  
8  
9 vocational/secondary education level.  
10

11  
12  
13 Of the 1069 babies born, 992 were enrolled (93%) (Figure 1). Initial neurodevelopmental  
14  
15 assessments using the Bayley instrument at 12-27 months in 832 infants are being analyzed. To  
16  
17 date, the total number of biospecimens (N=13,379) collected from 1143 pregnant women include  
18  
19 whole blood for trace elements (N=1994), whole blood collected in K2EDTA anticoagulant  
20  
21 (N=1994), serum collected in serum separator tubes (N=1994), plasma (N=1994), urine (N=1980),  
22  
23 buccal swabs (N=941), and hair (N=876); from 992 infants cord blood (N=441), blood from heel  
24  
25 prick (N=323), and buccal swabs (N=842). All samples not yet analyzed are archived for future  
26  
27 targeted and untargeted analyses. Available results include total mercury concentrations in hair  
28  
29 from pregnant women, prenatal maternal depression and perceived stress, level of pesticides in  
30  
31 produce, and dietary exposure to Hg in fish. Results of heavy metals in blood, urinary pesticide  
32  
33 metabolites, telomere analysis, and neurodevelopmental assessments are pending.  
34  
35  
36  
37  
38  
39  
40  
41

## 42 **Biological specimens**

43  
44  
45 Total hair Hg was measured in 876 participants from all three study sites. Overall, 39.1% had  
46  
47 elevated total mercury hair levels that exceeded the U.S. Environmental Protection Agency's  
48  
49 (USEPA) action level (1.1µg/g hair) [28]. For women from the interior, Nickerie and Paramaribo  
50  
51 these percentages were 95.8%, 26.3%, and 25.5% respectively. Results for median total Hg  
52  
53 concentrations in hair from pregnant women from Paramaribo (N=522) were 0.64µg/g hair  
54  
55  
56  
57

1  
2  
3 (interquartile ranges (IQR) 0.36-1.09;range 0.00-7.12), from Nickerie (N=176) 0.73 $\mu$ g/g (IQR  
4 0.45-1.05;0.00-5.79) and the interior (N=178) 3.48 $\mu$ g/g (IQR 1.92-7.39;0.38-18.20). Pregnant  
5 women from the interior were exposed to high levels of Hg compared to women from the coastal  
6 area and thus fetal exposures are expected to be high. Most of these women are primarily exposed  
7 to methylmercury from consuming contaminated fish from local artisanal gold-mining activities  
8 [18,24]. Other possible sources of exposure may include active participation in or living very close  
9 to gold mining areas. Mercury concentrations from women residing in Paramaribo and Nickerie  
10 are similar to those found in other studies [29,30].  
11  
12  
13  
14  
15  
16  
17  
18  
19  
20  
21  
22  
23  
24

### 25 **Prenatal depression and perceived stress**

26  
27  
28 Depression and prenatal stress in 722 participants were assessed using the standardized Edinburgh  
29 Postnatal Depression Scale (EPDS) (cut-off  $\geq 12$  for probable depression) and Cohen Perceived  
30 Stress Scale (cut-off  $\geq 20$  for high perceived stress) respectively. One in four (24.9%) participants  
31 had EPDS scores indicative of probable depression, three in ten (30.2%) had high stress levels and  
32 nearly half (49.1%) of these women had probable depression.  
33  
34  
35  
36  
37  
38  
39  
40  
41  
42

### 43 **Dietary exposure to pesticides**

44  
45 An assessment of Surinamese agricultural produce conducted by members of our study team found  
46 pesticide residues exceeding European Union maximum residue limits, including prohibited-  
47 worldwide endosulfan and lindane in the leafy vegetable tannia, *Xanthosoma brasiliense* [31]. An  
48 interviewer-assisted NHANES-based dietary survey of 522 participants showed that 98.2%  
49 reported consumption of leafy vegetables. Tannia was the most frequently consumed (89.3%);  
50  
51  
52  
53  
54  
55  
56  
57  
58  
59  
60

1  
2  
3 36.5% participants had high intake rates of tannia ( $\geq 36$  gram/day) [32]. Tannia is also a commonly  
4 used vegetable in baby food preparation in Suriname.  
5  
6  
7  
8  
9

### 10 **Dietary exposure to Hg in fish**

11  
12  
13 Dietary questionnaire analyses (n=990) showed an overall fish consumption of 96.1%. Respective  
14 consumption in the total cohort of the three most consumed carnivorous species *Hoplias aimara*,  
15 *Serrasalmus rhombeus* and *Cichla ocellaris*, that are known to have high Hg levels, was 44.4%,  
16 19.3%, and 26.3%, and was greater among the interior subcohort (N=123): 89.4%, 67.5%, and  
17 74.8%, respectively. These dietary assessments support our hypothesis that fish consumption is  
18 consistent with the Hg exposures. In addition, we have speciated Hg in blood and hair and found  
19 that the majority of Hg in these human samples is methylmercury which is consistent with fish  
20 consumption being the primary source of Hg exposure in our participants.  
21  
22  
23  
24  
25  
26  
27  
28  
29  
30  
31

32  
33 Measurements of fatty acids showed that freshwater species had higher levels of linoleic acid (2.0  
34 vs. 0.2mg/g), alpha-linoleic acid (0.4 vs. 0.1mg/g), arachidonic acid (3.0 vs. 1.5mg/g), omega-6  
35 fatty acids (6.5 vs. 2.3mg/g) and lower levels of eicosapentaenoic acid (0.8 vs. 1.9mg/g) compared  
36 to marine species.  
37  
38  
39  
40  
41  
42  
43  
44  
45

### 46 **Strengths and limitations**

47  
48  
49 This CCREOH study is the first to examine the potential impact of complex environmental  
50 exposures on maternal and child health in Suriname by a multi-disciplinary team of research  
51 scientists. Study's strengths include: 1) addressing two high priority public health threats: the  
52 impact of Hg exposure from artisanal gold mining, and pesticide exposure associated with  
53  
54  
55  
56  
57  
58  
59  
60

1  
2  
3 agricultural practices; 2) inclusion in the cohort of two vulnerable subpopulations: pregnant  
4 women and children; 3) the longitudinal follow up with children until 48 months with built-in  
5 timepoints to assess neurodevelopmental outcomes; and 4) a biospecimen bank of approximately  
6 13,000 samples, providing the opportunity for future analyses within the cohort. Moreover, a  
7 linked research training grant facilitates the training of nine Surinamese PhD candidates with  
8 dissertation research embedded in the study, thereby building critical in-country environmental  
9 health research capacity.

10  
11  
12  
13  
14  
15  
16  
17  
18  
19  
20 Delayed recruitment and data collection of the logistically difficult to reach sub-cohort in the  
21 interior region (N=200) was ameliorated by additional team support onsite; delays in transporting  
22 interior biospecimens rendered some early cord blood specimens not analyzable and was corrected  
23 by collecting an additional heelprick sample. Other limitations include differences in educational  
24 level between women from the three recruitment sites that could confound or impact literacy.  
25 Participants may have moved between regions with different sources of exposure. Some  
26 participants from the interior sub-cohort were recruited in the second or early third trimester  
27 because of the distance to prenatal clinics. This may limit our ability to understand differential  
28 effects of exposure across gestation for this sub-cohort.  
29  
30  
31  
32  
33  
34  
35  
36  
37  
38  
39  
40  
41  
42  
43  
44

## 45 **Future plans**

46  
47  
48 Culturally tailored fish consumption advisories are in development to reduce Hg exposure. Recent  
49 additional funding allows us to examine potentially beneficial neuroprotective factors such as  
50 selenium and dietary polyunsaturated fatty acids in fish that may counter the neurotoxic effects of  
51 mercury. To address the large scale and poorly regulated use of pesticides, we are also developing  
52  
53  
54  
55  
56  
57

1  
2  
3 a pesticide literacy scale. Cohort-wide, we will undertake a comprehensive assessment of the  
4 neurodevelopmental outcomes of the children, and create a robust, sharable data management  
5 system of biospecimen and non-biospecimen data building on the current REDCap database.  
6  
7  
8  
9  
10  
11  
12  
13

## 14 **Acknowledgements**

15  
16  
17 We would like to thank our recruiters Jeetendra Jitan, Nishaira Doerga, Gimradj Dwarka, Sue-Ann  
18 Sitaram, Devika Kalika, the Community Health Workers from Nickerie Lilian Singotiko, Henna  
19 Mawo, Karien Jodiwongso, Karishma Bhondoe, Jay Kalicharan, Bhairam Goberdan, Azeez  
20 Khodabaks, the midwives and laboratory personnel of the Academic Hospital Paramaribo,  
21 Diakonessenhuis Hospital, St. Vincentius Hospital, 's-Lands Hospital, Mungra Medical Centre,  
22 Regional Health Service clinics and Medical Mission Primary Health Care Suriname, the National  
23 Zoological Collection of Suriname/Center for Environmental Research staff, Sila Kisoensingh  
24 MSc, Dr. Richenel Ellecom and Dr. Melissa Middleton for their help during the pediatric  
25 neurodevelopment assessments, and the members of the External Advisory Board and Community  
26 Advisory Board for their guidance and valuable advice.  
27  
28  
29  
30  
31  
32  
33  
34  
35  
36  
37  
38  
39  
40  
41  
42  
43  
44

## 45 **Collaborators**

46  
47 We welcome collaboration with fellow researchers working on similar projects. Specific research  
48 proposals can be sent directly to the Principal Investigators Drs. Wilco Zijlmans  
49 ([cwrzijlmans@researchcentersuriname.org](mailto:cwrzijlmans@researchcentersuriname.org)) and Maureen Lichtveld ([mlichtve@tulane.edu](mailto:mlichtve@tulane.edu)).  
50  
51 Areas of collaboration include further environmental and biomarkers assessment of arsenic  
52  
53  
54  
55  
56  
57  
58  
59  
60

1  
2  
3 exposure, occupational health risk assessments associated with mercury and pesticide exposure,  
4  
5 and exposomic analyses including metabolomic assessments.  
6  
7  
8  
9  
10

## 11 **Author Contributions**

12  
13 MYL, JKW, HHC, EWH, AS, SSD and WCWRZ designed and established the cohort. MSMO,  
14  
15 ADHM, EWH, FAW and AG participated in the design of the questionnaires. WCWRZ, MSMO,  
16  
17 EB, WBH, GKB, RR and MYL are responsible for the continued management of the cohort. GKB,  
18  
19 RR, AG and FAW are actively involved with recruitment of participants and collection of non-  
20  
21 biospecimen data and biospecimens. JC, JR, PEO and GAL store, archive and analyze the  
22  
23 biomarker samples. ADHM, AS, MSMO, AG, MYL and WCWRZ are responsible for data  
24  
25 management. SSD, AWEG, RR and EB manage neurodevelopmental testing of babies. JKW, LFS,  
26  
27 CSA, SSD interpret all results. WCWRZ, JKW, HHC, ADHM and MYL drafted and edited the  
28  
29 manuscript. All authors critically reviewed and approved the final manuscript.  
30  
31  
32  
33  
34  
35  
36  
37

## 38 **Funding**

39  
40  
41 Research reported in this publication was supported by the Fogarty International Center of the  
42  
43 National Institutes of Health under Award Numbers: U01TW010087 and U2RTW010104. The  
44  
45 content is solely the responsibility of the authors and does not necessarily represent the official  
46  
47 views of the National Institutes of Health.  
48  
49  
50  
51  
52  
53

## 54 **Competing interests**

1  
2  
3 None declared  
4  
5  
6  
7  
8

9  
10 **Patient consent for publication**  
11

12 Obtained  
13  
14  
15

16  
17  
18  
19 **Ethical approval**  
20

21  
22 This study was IRB approved by both the Government of Suriname and the Tulane University,  
23 New Orleans, Louisiana, USA, to consent 1200 pregnant women and their singleton birth  
24 children.  
25  
26  
27  
28  
29

30  
31  
32  
33 **Provenance and peer review**  
34

35 Not commissioned; externally peer reviewed.  
36  
37  
38  
39  
40  
41  
42

43 **Data sharing statement**  
44

45  
46 Our cohort study data will be made publicly available upon publication of the results in scientific  
47 articles. Questionnaire, registry and biospecimen data could be made accessible in de-identified  
48 form after an application process that includes submission of a research plan. We are currently  
49 collaborating with Research Triangle Institute International (RTI), a global data management  
50 enterprise, to develop an integrated database of biospecimen and non-biospecimen data. Once  
51  
52  
53  
54  
55  
56  
57



1  
2  
3 that is fully developed, data can be made available based on a reasonable request to the PIs. Such  
4  
5 requests will be discussed with the full investigator Committee, the Data Management  
6  
7 Committee, and the Administrative Oversight Committee.  
8  
9  
10  
11  
12  
13

## 14 **References**

- 15  
16  
17  
18 1. Lichtveld MY, Hawkins WB, Ouboter PE *et al.* A One Health approach to interdict  
19  
20 environmental health threats in Suriname. *Ann Glob Health* 2016;82:444.  
21  
22
- 23 2. Silbergeld EK, Patrick TE. Environmental exposures, toxicologic mechanisms, and adverse  
24  
25 pregnancy outcomes. *Am J Obstet Gynecol* 2005;192:S11-21.  
26  
27
- 28 3. Ferguson KK, O'Neill MS, Meeker JD. Environmental contaminant exposures and preterm  
29  
30 birth: a comprehensive review. *J Toxicol Environ Health B Crit Rev* 2013;16:69-113.  
31  
32
- 33 4. Wigle DT, Arbuckle TE, Turner MC *et al.* Epidemiologic evidence of relationships between  
34  
35 reproductive and child health outcomes and environmental chemical contaminants. *J Toxicol*  
36  
37 *Environ Health B Crit Rev* 2008;11:373-517.  
38  
39
- 40 5. Lewis M, Worobey J, Ramsay DS *et al.* Prenatal exposure to heavy metals: effect on childhood  
41  
42 cognitive skills and health status. *Pediatrics* 1992;89:1010-5.  
43  
44
- 45 6. Burns CJ, McIntosh LJ, Mink PJ, Jurek AM, Li AA. Pesticide exposure and  
46  
47 neurodevelopmental outcomes: Review of the epidemiologic and animal studies. *J Toxicol*  
48  
49 *Environ Health B Crit Rev* 2013;16:127-283.  
50  
51  
52  
53  
54  
55  
56  
57  
58  
59  
60

- 1  
2  
3 7. Eskenazi B, Kogut K, Huen K *et al.* Organophosphate pesticide exposure, PON1, and  
4 neurodevelopment in school-age children from the CHAMACOS study. *Environ Res*  
5 2014;134C:149-57.  
6  
7
- 8  
9  
10 8. Furlong MA, Engel SM, Barr DB, Wolff MS. Prenatal exposure to organophosphate pesticides  
11 and reciprocal social behavior in childhood. *Environ Int* 2014;70:125-31.  
12  
13
- 14  
15 9. Quirós-Alcalá L, Alkon AD, Boyce WT *et al.* Maternal prenatal and child organophosphate  
16 pesticide exposures and children's autonomic function. *Neurotoxicology* 2011;32:646-55.  
17  
18
- 19  
20 10. Rosas LG, Eskenazi B. Pesticides and child neurodevelopment. *Curr Opin Pediatr*  
21 2008;20:191-7.  
22  
23
- 24  
25 11. Belles M, Albina ML, Sanchez DJ *et al.* Interactions in developmental toxicology: effects of  
26 concurrent exposure to lead, organic mercury, and arsenic in pregnant mice. *Arch Environ*  
27 *Contam Toxicol* 2002;42:93-8.  
28  
29
- 30  
31 12. Callahan MA, Sexton K. If cumulative risk assessment is the answer, what is the question?  
32 *Environ Health Perspect* 2007;115:799-806.  
33  
34
- 35  
36 13. Golding J, Rai D, Gregory S *et al.* Prenatal mercury exposure and features of autism: a  
37 prospective population study. *Mol Autism* 2018;9:30.  
38  
39
- 40  
41 14. Valent F, Mariuz M, Bin M *et al.* Associations of prenatal mercury exposure from maternal  
42 fish consumption and polyunsaturated fatty acids with child neurodevelopment: a prospective  
43 cohort study in Italy. *J Epidemiol* 2013;23:360-70.  
44  
45  
46  
47  
48  
49  
50  
51  
52  
53  
54  
55  
56  
57

- 1  
2  
3 15. Sapbamrer R, Hongsibsong S. Effects of prenatal and postnatal exposure to organophosphate  
4 pesticides on child neurodevelopment in different age groups: a systematic review. *Environ*  
5  
6 *Sci Pollut Res Int* 2019;26:18267-90.  
7  
8  
9
- 10  
11 16. Wang J, Wu W, Li H *et al.* Relation of prenatal low-level mercury exposure with early child  
12 neurobehavioral development and exploration of the effects of sex and DHA on it. *Environ Int*  
13  
14 2019;126:14-23.  
15  
16  
17
- 18  
19 17. Results Eighth Population and Housing Census in Suriname (Volume 1) Demographic and  
20 Social Characteristics and Migration. *General Bureau of Statistic Studies in Suriname (ABS)*  
21  
22 2013.  
23  
24  
25
- 26  
27 18. Ouboter PE, Landburg G, Satnarain GU *et al.* Mercury Levels in Women and Children from  
28 Interior Villages in Suriname, South America. *Int J Environ Res Public Health* 2018;15:1007.  
29  
30
- 31  
32 19. Harris PA, Taylor R, Minor BL *et al.* The REDCap consortium: Building an international  
33 community of software partners, *J Biomed Inform* 2019;95:1-10. doi:  
34 10.1016/j.jbi.2019.103208  
35  
36  
37  
38
- 39  
40 20. Jayatilaka NK, Restrepo P, Williams L, *et al.* Quantification of three chlorinated dialkyl  
41 phosphates, diphenyl phosphate, 2,3,4,5-tetrabromobenzoic acid, and four other  
42 organophosphates in human urine by solid phase extraction-high performance liquid  
43 chromatography-tandem mass spectrometry. *Anal Bioanal Chem* 2017;409:1323-32.  
44  
45  
46  
47  
48
- 49  
50 21. Davis MD, Wade EL, Restrepo PR, *et al.* Semi-automated solid phase extraction method for  
51 the mass spectrometric quantification of 12 specific metabolites of organophosphorus  
52 pesticides, synthetic pyrethroids, and select herbicides in human urine. *Journal of*  
53  
54 *Chromatography B.* 2013;929:18-26  
55  
56  
57

- 1  
2  
3 22. Stacy S. Drury, Emily Mabile, Zoë H. Brett *et al.* The Association of Telomere Length With  
4 Family Violence and Disruption. *Pediatrics* 2014;134:e128–e137.  
5  
6  
7  
8 23. Cawthon RM. Telomere length measurement by a novel monochrome multiplex qualitative  
9 PCR method. *Nucleic Acids Res* 2009;37:e21.  
10  
11  
12  
13 24. Ouboter PE, Landburg GA, Quik JHM, Mol JHA, van der Lugt F. Mercury Levels in Pristine  
14 and Gold Mining Impacted Aquatic Ecosystems of Suriname, South America. *Ambio*  
15 2012;41:873-82.  
16  
17  
18  
19 25. Dellinger MJ, Olson JT, Holub BJ, Ripley MP. Mercury, polychlorinated biphenyls, selenium,  
20 and fatty acids in tribal fish harvests of the upper great lakes. *Risk Anal* 2018;38:2029-2040.  
21  
22  
23  
24 26. Ginsberg GL, Toal BF, McCann PJ. Updated risk/benefit analysis of fish consumption effects  
25 on neurodevelopment: Implications for setting advisories. *Hum. Ecol. Risk Assess*  
26 2015;21:1810-1839.  
27  
28  
29  
30 27. Clarkson TW, Strain JJ. Nutritional factors may modify the toxic action of methyl mercury in  
31 fish-eating populations. *J. Nutr* 2003;133:1539S-1543S.  
32  
33  
34  
35 28. Mercury Study Report to Congress Volume V: Health Effects of Mercury and Mercury  
36 Compounds. Volume 5. United States Environmental Protection Agency; Washington, DC,  
37 USA: 1997;1–348.  
38  
39  
40  
41 29. Zilversmit L, Wickliffe J, Shankar A, Taylor R, Harville E. Correlations of biomarkers and  
42 self-reported seafood consumption among pregnant and non-pregnant women in southeastern  
43 Louisiana after the Gulf oil spill: the GROWH study. *Int J Environ Res Public Health* 2017;14:  
44 784.  
45  
46  
47  
48  
49  
50  
51  
52  
53  
54  
55  
56  
57  
58  
59  
60

- 1  
2  
3 30. Castaño A, Cutanda F, Esteban M, *et al.* Fish consumption patterns and hair mercury levels in  
4 children and their mothers in 17 EU countries. *Environ Res* 2015;141:58-68.  
5  
6  
7  
8 31. Abdoel Wahid F, Wickliffe J, Wilson M *et al.* Presence of pesticide residues on produce  
9 cultivated in Suriname. *Environ Monit Assess* 2017;189:303.  
10  
11  
12  
13 32. F. Abdoel Wahid, A. D. Hindori-Mohangoo, M. Wilson *et al.* Dietary Exposure to Pesticides  
14 in Pregnant Surinamese Women. *Environ Health Perspect* 2018;  
15  
16 <https://doi.org/10.1289/isesisee.2018.P01.2380>  
17  
18  
19  
20  
21  
22  
23  
24  
25  
26  
27  
28  
29  
30  
31  
32  
33  
34  
35  
36  
37  
38  
39  
40  
41  
42  
43  
44  
45  
46  
47  
48  
49  
50  
51  
52  
53  
54  
55  
56  
57  
58  
59  
60

**Table 1.** Assessments completed by the CCREOH-MeKiTamara Cohort with timeline

| Assessments                    | Trimester                        |                 | Birth | 12<br>mos | 36<br>mos | 48<br>mos |
|--------------------------------|----------------------------------|-----------------|-------|-----------|-----------|-----------|
|                                | 1 <sup>st</sup> /2 <sup>nd</sup> | 3 <sup>rd</sup> |       |           |           |           |
| <b>Mother</b>                  |                                  |                 |       |           |           |           |
| Obstetric history              | •                                | •               |       |           |           |           |
| Demographics                   | •                                |                 |       |           |           |           |
| Residency                      | •                                | •               |       |           |           |           |
| Anthropometrics                | •                                | •               |       |           |           |           |
| Marital status                 | •                                |                 |       |           |           |           |
| Ethnicity                      | •                                |                 |       |           |           |           |
| Occupation                     | •                                |                 |       |           |           |           |
| Education                      | •                                |                 |       |           |           |           |
| Household income               | •                                |                 |       |           |           |           |
| Household composition          | •                                |                 |       |           |           |           |
| Maternity care                 | •                                | •               |       |           |           |           |
| Medication                     |                                  | •               |       |           |           |           |
| <b>Questionnaires</b>          |                                  |                 |       |           |           |           |
| SF 36 Health Survey            | •                                | •               |       |           |           |           |
| Social Support List            | •                                |                 |       |           |           |           |
| Brief Trauma Interview         | •                                | •               |       |           | •         | •         |
| Cohen's Perceived Stress Scale | •                                | •               |       |           | •         | •         |
| Edinburgh Depression Scale     | •                                | •               |       |           | •         | •         |
| ASSIST V3.0                    | •                                | •               |       |           | •         | •         |
| Exposure History               | •                                |                 |       |           |           |           |
| Prenatal Life Events Scale     | •                                | •               |       |           |           |           |
| Subjective Social Status       | •                                | •               |       |           |           |           |
| Dietary Assessment             | •                                | •               |       |           |           |           |
| Family Environment Scale       |                                  |                 |       |           | •         | •         |
| Parenting Stress Index         |                                  |                 |       |           | •         | •         |
| <b>Biological samples</b>      |                                  |                 |       |           |           |           |
| Hair                           | •                                |                 |       |           |           |           |
| Blood                          | •                                | •               |       |           |           |           |
| Urine                          | •                                | •               |       |           |           |           |
| Buccal swab                    | •                                |                 |       |           |           |           |
| <b>At birth</b>                |                                  |                 |       |           |           |           |
| Mode of delivery               |                                  |                 | •     |           |           |           |
| Cord or heelprick blood sample |                                  |                 | •     |           |           |           |
| Birth outcomes                 |                                  |                 | •     |           |           |           |
| <b>Child development</b>       |                                  |                 |       |           |           |           |
| Physical examination           |                                  |                 |       | •         | •         | •         |
| <b>Questionnaires</b>          |                                  |                 |       |           |           |           |
| Generation R                   |                                  |                 |       | •         | •         | •         |
| M-CHAT                         |                                  |                 |       |           | •         |           |
| Child Behavior Checklist       |                                  |                 |       |           | •         | •         |
| Bayley SEQ                     |                                  |                 |       |           | •         |           |



**Table 2.** Distribution of maternal and infant characteristics

| Maternal characteristics<br>(N=1143) | N   | %    | Infant characteristics (N=971)        | N   | %    |
|--------------------------------------|-----|------|---------------------------------------|-----|------|
| <u>Age at intake</u>                 |     |      | <u>Gender</u>                         |     |      |
| 16-19 years                          | 142 | 12.6 | Male                                  | 510 | 52.5 |
| 20-24 years                          | 260 | 22.8 | Female                                | 457 | 47.1 |
| 25-29 years                          | 291 | 25.5 | Missing                               | 4   | 0.4  |
| 30-34 years                          | 268 | 23.5 | <u>Birth status</u>                   |     |      |
| 35-39 years                          | 140 | 12.3 | Live birth                            | 947 | 97.5 |
| 40+ years                            | 39  | 3.4  | Stillbirth                            | 23  | 2.4  |
| Missing                              | 1   | 0.1  | Missing                               | 1   | 0.1  |
| <u>Parity</u>                        |     |      | <u>Birthweight (in grams)</u>         |     |      |
| 0 previous live births               | 384 | 33.7 | Low birthweight (<2500)               | 127 | 13.1 |
| 1 previous live birth                | 312 | 27.3 | Normal birthweight (≥2500)            | 835 | 86.0 |
| 2 previous live births               | 187 | 16.4 | Missing                               | 9   | 0.9  |
| 3 previous live births               | 112 | 9.8  | <u>Gestational age (in weeks)</u>     |     |      |
| 4+ previous live births              | 146 | 12.8 | Very preterm births (22+0-32+6)       | 39  | 4.0  |
| Missing                              | 2   | 0.2  | Moderately preterm births (33+0-36+6) | 107 | 11.0 |
| <u>Ethnicity</u>                     |     |      | Term births (≥37+0)                   | 817 | 84.1 |
| Creole                               | 249 | 21.8 | Missing                               | 8   | 0.8  |
| Hindustani                           | 233 | 20.4 | <u>Apgar score at 5 minutes</u>       |     |      |
| Indigenous                           | 155 | 13.6 | 0 - 6                                 | 31  | 3.2  |
| Javanese                             | 101 | 8.8  | 7 - 10                                | 918 | 94.5 |
| Tribal                               | 271 | 23.7 | Missing                               | 22  | 2.3  |
| Mixed                                | 127 | 11.1 |                                       |     |      |
| Other                                | 7   | 0.6  |                                       |     |      |
| Missing                              | 0   | 0.0  |                                       |     |      |
| <u>Educational level</u>             |     |      |                                       |     |      |
| No or primary                        | 276 | 24.1 |                                       |     |      |
| Lower vocational/secondary           | 382 | 33.4 |                                       |     |      |



1  
2  
3  
4  
5  
6  
7  
8  
9  
10  
11  
12  
13  
14  
15  
16  
17  
18  
19  
20  
21  
22  
23  
24  
25  
26  
27  
28  
29  
30  
31  
32  
33  
34  
35  
36  
37  
38  
39  
40  
41  
42  
43  
44  
45  
46  
47

|                            |     |      |
|----------------------------|-----|------|
| Upper vocational/secondary | 317 | 27.7 |
| Tertiary                   | 168 | 14.7 |
| Missing                    | 0   | 0.0  |

|                       |     |      |
|-----------------------|-----|------|
| Household income SRD* |     |      |
| <1500                 | 401 | 35.1 |
| 1500-2999             | 362 | 33.0 |
| 3000-4999             | 221 | 20.2 |
| 5000+                 | 112 | 9.8  |
| Missing               | 47  | 4.1  |

|                                     |      |      |
|-------------------------------------|------|------|
| Marital status                      |      |      |
| Married or living with partner      | 1000 | 87.6 |
| Not married/not living with partner | 141  | 12.4 |
| Missing                             | 2    | 0.2  |

---

\* SRD = Surinamese dollar, equivalent to 0.13 USD.

For peer review only

1  
2  
3 **Figure legends**  
4  
5  
6

7 **Figure 1.** Flowchart with participant enrolment.  
8  
9  
10  
11  
12  
13  
14  
15  
16  
17  
18  
19  
20  
21  
22  
23  
24  
25  
26  
27  
28  
29  
30  
31  
32  
33  
34  
35  
36  
37  
38  
39  
40  
41  
42  
43  
44  
45  
46  
47  
48  
49  
50  
51  
52  
53  
54  
55  
56  
57  
58  
59  
60

For peer review only

1  
2  
3  
4  
5  
6  
7  
8  
9  
10  
11  
12  
13  
14  
15  
16  
17  
18  
19  
20  
21  
22  
23  
24  
25  
26  
27  
28  
29  
30  
31  
32  
33  
34  
35  
36  
37  
38  
39  
40  
41  
42  
43  
44  
45  
46  
47  
48  
49  
50  
51  
52  
53  
54  
55  
56  
57  
58  
59  
60

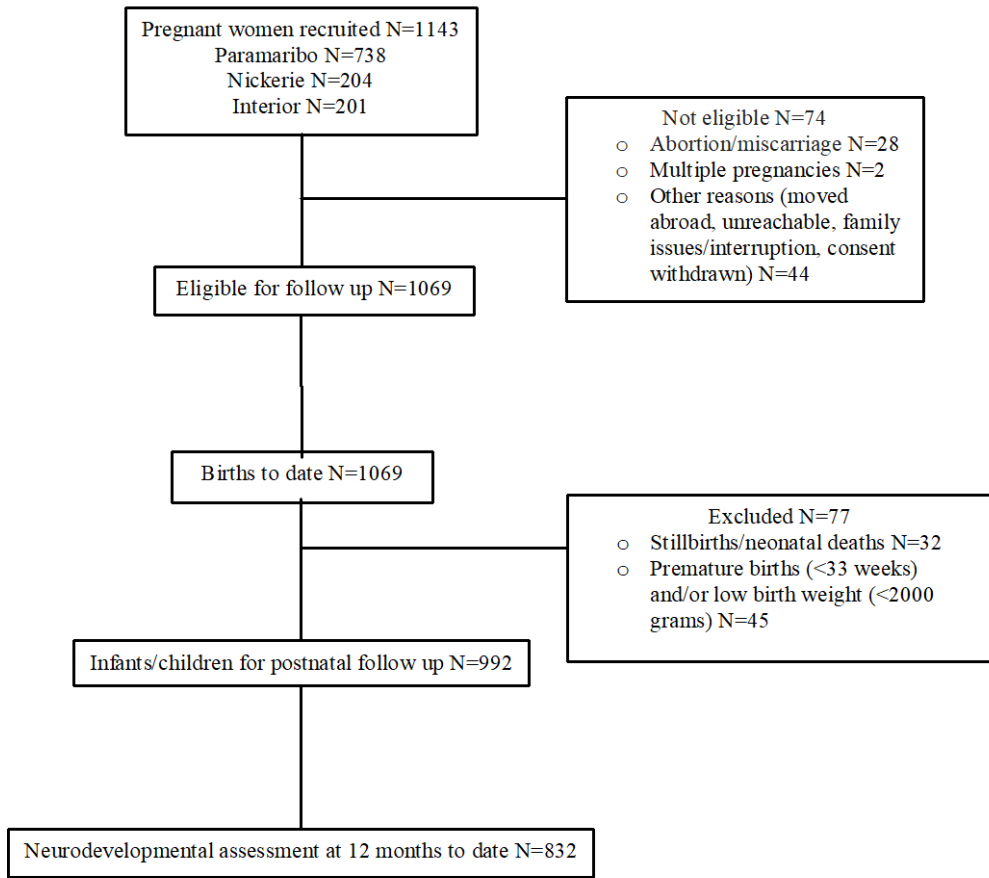

# BMJ Open

## Cohort profile: The Caribbean Consortium for Research in Environmental and Occupational Health (CCREOH) Cohort Study: Influences of complex environmental exposures on maternal and child health in Suriname

|                                 |                                                                                                                                                                                                                                                                                                                                                                                                                                                                                                                                                                                                                                                                                                                                                                                                                                                                                                                                                                                                                                                                                                                                                                                                                                                                                                                                                                                                                                                                                                                                                                                                                                                                                                                         |
|---------------------------------|-------------------------------------------------------------------------------------------------------------------------------------------------------------------------------------------------------------------------------------------------------------------------------------------------------------------------------------------------------------------------------------------------------------------------------------------------------------------------------------------------------------------------------------------------------------------------------------------------------------------------------------------------------------------------------------------------------------------------------------------------------------------------------------------------------------------------------------------------------------------------------------------------------------------------------------------------------------------------------------------------------------------------------------------------------------------------------------------------------------------------------------------------------------------------------------------------------------------------------------------------------------------------------------------------------------------------------------------------------------------------------------------------------------------------------------------------------------------------------------------------------------------------------------------------------------------------------------------------------------------------------------------------------------------------------------------------------------------------|
| Journal:                        | <i>BMJ Open</i>                                                                                                                                                                                                                                                                                                                                                                                                                                                                                                                                                                                                                                                                                                                                                                                                                                                                                                                                                                                                                                                                                                                                                                                                                                                                                                                                                                                                                                                                                                                                                                                                                                                                                                         |
| Manuscript ID                   | bmjopen-2019-034702.R3                                                                                                                                                                                                                                                                                                                                                                                                                                                                                                                                                                                                                                                                                                                                                                                                                                                                                                                                                                                                                                                                                                                                                                                                                                                                                                                                                                                                                                                                                                                                                                                                                                                                                                  |
| Article Type:                   | Cohort profile                                                                                                                                                                                                                                                                                                                                                                                                                                                                                                                                                                                                                                                                                                                                                                                                                                                                                                                                                                                                                                                                                                                                                                                                                                                                                                                                                                                                                                                                                                                                                                                                                                                                                                          |
| Date Submitted by the Author:   | 28-Jul-2020                                                                                                                                                                                                                                                                                                                                                                                                                                                                                                                                                                                                                                                                                                                                                                                                                                                                                                                                                                                                                                                                                                                                                                                                                                                                                                                                                                                                                                                                                                                                                                                                                                                                                                             |
| Complete List of Authors:       | Zijlmans, Wilco; Anton de Kom University of Suriname Faculty of Medical Sciences, Pediatrics; Academic Hospital Paramaribo, Scientific Research Center Suriname<br>Wickliffe, Jeffrey; Tulane University, Global Environmental Health Sciences<br>Hindori-Mohangoo, Ashna; Perisur (Perinatal Interventions Suriname) Foundation<br>MacDonald-Ottevanger, Sigrid; Academic Medical Center, Amsterdam, The Netherlands<br>Ouboter, Paul; Institute for Neotropical Wildlife & Environmental Studies, Paramaribo, Suriname<br>Landburg, Gwendolyn; Anton de Kom University of Suriname, Paramaribo, Suriname, National Zoological Collection of Suriname/Center for Environmental Research<br>Codrington, John; Academic Hospital Paramaribo, Department of Clinical Chemistry<br>Roosblad, Jimmy; Academic Hospital Paramaribo<br>Baldewsingh, Gaitree; Medical Mission Primary Health Care Suriname<br>Ramjatan, Radha ; Regional Health Service<br>Gokoel, Anisma; Academic Hospital Paramaribo, Scientific Research Center Suriname<br>Abdoel Wahid, Firoz; Tulane University<br>Fortes Soares, Lissa; Tulane University<br>Alcala, Cecilia; Tulane University<br>Boedhoe, Esther; Academic Hospital Paramaribo<br>Grünberg, Antoon; Ministry of Health, Paramaribo, Suriname, Department of Public Health<br>Hawkins, William; Tulane University<br>Shankar, Arti; Tulane University<br>Harville, Emily; Tulane University School of Public Health, Epidemiology<br>Drury, SS; Department of Psychiatry and Behavioral Sciences, Tulane University<br>Covert, Hannah; Tulane University<br>Lichtveld, Maureen; Tulane University School of Public Health and Tropical Medicine, Global environmental health sciences |
| <b>Primary Subject Heading</b>: | Occupational and environmental medicine                                                                                                                                                                                                                                                                                                                                                                                                                                                                                                                                                                                                                                                                                                                                                                                                                                                                                                                                                                                                                                                                                                                                                                                                                                                                                                                                                                                                                                                                                                                                                                                                                                                                                 |

1  
2  
3  
4  
5  
6  
7  
8  
9  
10  
11  
12  
13  
14  
15  
16  
17  
18  
19  
20  
21  
22  
23  
24  
25  
26  
27  
28  
29  
30  
31  
32  
33  
34  
35  
36  
37  
38  
39  
40  
41  
42  
43  
44  
45  
46  
47  
48  
49  
50  
51  
52  
53  
54  
55  
56  
57  
58  
59  
60

|                            |                                                                                                                                                                                             |
|----------------------------|---------------------------------------------------------------------------------------------------------------------------------------------------------------------------------------------|
| Secondary Subject Heading: | Epidemiology, Global health, Public health                                                                                                                                                  |
| Keywords:                  | Community child health < PAEDIATRICS, Developmental neurology & neurodisability < PAEDIATRICS, PERINATOLOGY, PUBLIC HEALTH, Epidemiology < TROPICAL MEDICINE, Nutrition < TROPICAL MEDICINE |
|                            |                                                                                                                                                                                             |





I, the Submitting Author has the right to grant and does grant on behalf of all authors of the Work (as defined in the below author licence), an exclusive licence and/or a non-exclusive licence for contributions from authors who are: i) UK Crown employees; ii) where BMJ has agreed a CC-BY licence shall apply, and/or iii) in accordance with the terms applicable for US Federal Government officers or employees acting as part of their official duties; on a worldwide, perpetual, irrevocable, royalty-free basis to BMJ Publishing Group Ltd ("BMJ") its licensees and where the relevant Journal is co-owned by BMJ to the co-owners of the Journal, to publish the Work in this journal and any other BMJ products and to exploit all rights, as set out in our [licence](#).

The Submitting Author accepts and understands that any supply made under these terms is made by BMJ to the Submitting Author unless you are acting as an employee on behalf of your employer or a postgraduate student of an affiliated institution which is paying any applicable article publishing charge ("APC") for Open Access articles. Where the Submitting Author wishes to make the Work available on an Open Access basis (and intends to pay the relevant APC), the terms of reuse of such Open Access shall be governed by a Creative Commons licence – details of these licences and which [Creative Commons](#) licence will apply to this Work are set out in our licence referred to above.

Other than as permitted in any relevant BMJ Author's Self Archiving Policies, I confirm this Work has not been accepted for publication elsewhere, is not being considered for publication elsewhere and does not duplicate material already published. I confirm all authors consent to publication of this Work and authorise the granting of this licence.

**Title:** Cohort profile: The Caribbean Consortium for Research in Environmental and Occupational Health (CCREOH) Cohort Study: Influences of complex environmental exposures on maternal and child health in Suriname

## Author list

Wilco C.W.R. Zijlmans<sup>\*1,2,3</sup>, Jeffrey K. Wickliffe<sup>2</sup>, Ashna D. Hindori-Mohangoo<sup>2,4</sup>, M. Sigrid MacDonald-Ottevanger<sup>1,5</sup>, Paul E. Ouboter<sup>2,6,7</sup>, Gwendolyn A. Landburg<sup>6</sup>, John Codrington<sup>8</sup>, Jimmy Roosblad<sup>8</sup>, Gaitree K. Baldewsingh<sup>3,9</sup>, Radha Ramjatan<sup>3,10</sup>, Anisma Gokoel<sup>1,3</sup>, Firoz Abdoel Wahid<sup>1,2</sup>, Lissa Fortes Soares<sup>2</sup>, Cecilia S. Alcalá<sup>2</sup>, Esther Boedhoe<sup>1</sup>, Antoon W.E. Grünberg<sup>4,11</sup>, William B. Hawkins<sup>2,12</sup>, Arti Shankar<sup>2</sup>, Emily W. Harville<sup>13</sup>, Stacy S. Drury<sup>14</sup>, Hannah H. Covert<sup>2</sup>, Maureen Y. Lichtveld<sup>2</sup>

## Affiliations

<sup>1</sup> Scientific Research Center Suriname, Academic Hospital Paramaribo, Paramaribo, Suriname

<sup>2</sup> Department of Environmental Health Sciences, Tulane University School of Public Health and Tropical Medicine, New Orleans, LA, United States of America

<sup>3</sup> Faculty of Medical Sciences, Anton de Kom University of Suriname, Paramaribo, Suriname

<sup>4</sup> Foundation for Perinatal Interventions and Research in Suriname (Perisur), Paramaribo, Suriname

1  
2  
3<sup>5</sup> Department of Clinical Chemistry Medical Microbiology, Academic Medical Center,  
4  
5  
6  
7  
8  
9  
10  
11  
12  
13  
14  
15  
16  
17  
18  
19  
20  
21  
22  
23  
24  
25  
26  
27  
28  
29  
30  
31  
32  
33  
34  
35  
36  
37  
38  
39  
40  
41  
42  
43  
44  
45  
46  
47  
48  
49  
50  
51  
52  
53  
54  
55  
56  
57  
58  
59  
60

Amsterdam, The Netherlands

<sup>6</sup>National Zoological Collection of Suriname/Center for Environmental Research, Anton de Kom  
University of Suriname, Paramaribo, Suriname

<sup>7</sup> Institute for Neotropical Wildlife & Environmental Studies, Paramaribo, Suriname

<sup>8</sup> Department of Clinical Chemistry, Academic Hospital Paramaribo, Paramaribo, Suriname

<sup>9</sup> Medical Mission Primary Health Care Suriname, Paramaribo, Suriname

<sup>10</sup> Regional Health Service, Nickerie, Suriname

<sup>11</sup> Department of Public Health, Ministry of Health, Paramaribo, Suriname

<sup>12</sup> Department of Health Policy, Vanderbilt University Medical Center, Nashville, TN, United  
States of America

<sup>13</sup> Department of Epidemiology, Tulane University School of Public Health and Tropical  
Medicine, New Orleans, LA, United States of America

<sup>14</sup> Tulane University School of Medicine, New Orleans, LA, United States of America

\*Corresponding author. Scientific Research Center Suriname, Academic Hospital Paramaribo,  
Picornistreet 11, Paramaribo, Suriname. Email: [wilco.zijlmans@uvs.edu](mailto:wilco.zijlmans@uvs.edu)



## Abstract

**Purpose:** The Caribbean Consortium for Research in Environmental and Occupational Health (CCREOH) prospective environmental epidemiologic cohort study addresses the impact of chemical and non-chemical environmental exposures in mother/child dyads in Suriname. The study determines associations between levels of environmental elements and toxicants in pregnant women, and birth outcomes and neurodevelopment in their children.

**Participants:** Pregnant women (N=1143) were enrolled from December 2016 to July 2019 from three regions of Suriname: Paramaribo (N=738), Nickerie (N=204), and the tropical rainforest interior (N=201). Infants (N=992) were enrolled at birth. Follow-up will take place until children are 48 months old.

**Findings to date:** Biospecimens and questionnaire data on physiological and psychosocial health in pregnant women have been analyzed. 39.1% had hair mercury (Hg) levels exceeding values considered safe by international standards. Median hair-Hg concentrations in women from Paramaribo (N=522) were 0.64 $\mu$ g/g hair (interquartile ranges (IQR) 0.36-1.09; range 0.00-7.12), from Nickerie (N=176) 0.73 $\mu$ g/g (IQR 0.45-1.05;0.00-5.79) and the interior (N=178) 3.48 $\mu$ g/g (IQR 1.92-7.39;0.38-18.20). 96.1% of women ate fish, respective consumption of the three most consumed carnivorous species, *Hoplias aimara*, *Serrasalmus rhombeus*, and *Cichla ocellaris*, known to have high Hg levels, was 44.4%, 19.3%, and 26.3%, and was greater among the interior

1  
2  
3 subcohort. 89% frequently consumed the vegetable tannin, samples of which showed presence of  
4  
5  
6 worldwide banned pesticides. 24.9% of pregnant women had Edinburgh Depression Scale scores  
7  
8  
9 indicative of probable depression.

10  
11 **Future plans:** Fish consumption advisories are in development, especially relevant to interior  
12  
13  
14 women for whom fish consumption is likely to be the primary source of Hg exposure. Effects of  
15  
16  
17 potentially beneficial neuroprotective factors in fish that may counter neurotoxic effects of Hg are  
18  
19  
20 being examined. A pesticide literacy assessment in pregnant women is in progress.  
21  
22  
23 Neurodevelopmental assessments and telomere length measurements of the children to evaluate  
24  
25  
26 long-term effects of prenatal exposures to toxicant mixtures are ongoing.  
27  
28  
29  
30  
31

32 **Keywords** environmental exposures, mercury, metal mixtures, pregnant women, pediatric  
33  
34 neurodevelopment, Suriname  
35  
36  
37  
38  
39  
40

41 **Word count** 3997 (excl. references, acknowledgements, tables & figures)  
42  
43  
44  
45  
46

### 47 **Strengths and limitations of this study**

48  
49

- 50 • The study addresses two high priority public health threats in Suriname and neighboring  
51 countries in the Guiana Shield: the impact of mercury exposure from artisanal gold mining  
52  
53  
54  
55  
56  
57

1  
2  
3 and pesticide exposure associated with agricultural practices in two vulnerable  
4  
5 subpopulations: pregnant women and children younger than 5 years of age.  
6

- 7  
8 • The longitudinal follow up of children to 48 months provides several timepoints to assess  
9  
10 neurodevelopmental outcomes.
- 11  
12 • The study has a biospecimen bank of approximately 13,000 samples, providing the  
13  
14 opportunity for future biomarker analyses.
- 15  
16 • A linked research training grant facilitates the training of nine Surinamese PhD candidates  
17  
18 with dissertation research embedded in the study, thereby building critical in-country  
19  
20 environmental health research capacity.
- 21  
22 • The interior sub-cohort (N=201) was logistically difficult to reach, resulting in delayed  
23  
24 recruitment of some participants until the second or early third trimester. This may limit  
25  
26 our ability to understand differential effects of exposure across gestation. Transportation  
27  
28 challenges resulted in heel prick sampling replacing cord blood collection.  
29  
30  
31  
32  
33  
34  
35  
36  
37

## 38 **Introduction**

39  
40  
41 The Caribbean Consortium for Research in Environmental and Occupational Health (CCREOH)  
42  
43 addresses high-priority environmental and occupational health risks in Suriname and those  
44  
45 common to the vulnerable Caribbean region, while preserving unique cultural traditions of  
46  
47 indigenous people and other health disparate populations [1]. Exposure to environmental  
48  
49 contaminants at levels of public health concern may adversely affect pregnancy, and pre- and  
50  
51 postnatal health in multiple ways: miscarriage, preterm delivery, intra-uterine growth retardation,  
52  
53 congenital anomalies, and behavioral and physical consequences in later developmental stages [2,  
54  
55  
56  
57

1  
2  
3 3, 4]. Prenatal exposure to multiple heavy metals is associated with adverse pediatric health  
4  
5 outcomes [5]. Pesticide exposure has been linked to fetal growth decrements and preterm birth,  
6  
7 and there is mounting evidence that exposure to pesticides during pre- and postnatal development  
8  
9 is associated with neurodevelopmental deficits in young children [6-10]. Exposure to contaminant  
10  
11 mixtures can exacerbate adverse health effects: e.g. lead, arsenic, and mercury (Hg) can potentiate  
12  
13 each other's toxicity, even at individual levels below concentration expected to result in adverse  
14  
15 effects [11]. Despite this knowledge, no cumulative risk assessments have been conducted to date  
16  
17 addressing exposures to contaminant mixtures in Caribbean Low- and Middle-Income Countries  
18  
19 [12].  
20  
21  
22

23  
24 The CCREOH environmental epidemiology cohort study fills this gap by exploring the impact of  
25  
26 exposures to organic and inorganic neurotoxins, including Hg, lead and multiple  
27  
28 organophosphate pesticides, on Surinamese pregnant women and their offspring using a  
29  
30 cumulative risk approach. Specifically, the study assesses the impact of exposures to chemical and  
31  
32 non-chemical stressors by examining the interaction between exposure to environmental chemicals  
33  
34 and social and psychological determinants of early neurodevelopment. Few prospective studies  
35  
36 have measured exposure prenatally through 48 months in mother/child dyads, and those that have  
37  
38 showed contrasting results when evaluating executive function, a key neurodevelopmental  
39  
40 outcome [13-16]. Our hypothesis is that environmental exposures to mixtures of  
41  
42 neurodevelopmental toxicants and non-chemical stressors will result in increased adverse birth  
43  
44 outcomes and poorer child neurodevelopmental trajectories. Our research aims are to:  
45  
46  
47  
48

- 49  
50 • Identify exposures to a complex mixture of environmental elements and toxicants,  
51  
52 including Hg, lead, cadmium, aluminum, iron, manganese, tin, selenium and selected  
53  
54  
55  
56  
57

1  
2  
3 pesticides through comprehensive dietary and environmental risk assessments, and  
4  
5 biomarker monitoring in Surinamese pregnant women and their offspring;

- 6  
7  
8 • Assess levels of environmental elements and toxicants in fish, produce, rice, and  
9  
10 nutraceutical compounds;
- 11  
12 • Determine the association between levels of environmental elements and toxicants in  
13  
14 pregnant women and birth outcomes;
- 15  
16 • Assess the impact of mobile health technology-enabled community health workers  
17  
18 (CHWs) on birth outcomes and their associations with environmental contaminants;
- 19  
20 • Determine associations between prenatal, dietary, and environmental levels of elements  
21  
22 and toxicants and potential neuroprotective nutraceuticals on neurodevelopment.  
23  
24  
25

26  
27 CCREOH is funded by the Fogarty International Center at the US National Institutes of Health  
28  
29 (NIH).  
30  
31

## 32 33 34 35 **Cohort description**

### 36 37 38 **Study area**

39  
40  
41  
42 The Republic of Suriname is located on the northeastern coast of South America, bordered  
43  
44 by Brazil, Guyana, French Guiana, and the Atlantic Ocean. 90% of the 590,549 population lives  
45  
46 in the capital Paramaribo and the coastal area. The remainder live in the tropical rainforest interior  
47  
48 (90% of the landmass). Suriname's multi-ethnic population consists of five main groups:  
49  
50 Hindustani (27%), Tribal (22%), Creole (16%), Javanese (14%), and Indigenous (4%) [17].  
51  
52  
53  
54  
55  
56  
57  
58  
59  
60

## Recruitment

Pregnant women potentially exposed to complex environmental chemical- and non-chemical stressors were recruited from three regions of Suriname: (1) Paramaribo, where pesticides are primarily used for residential purposes; (2) Nickerie, the major rice producing region in western Suriname where pesticide use is abundant; and (3) the tropical rainforest interior, where Hg is used in artisanal gold mining and the population is highly dependent on consumption of contaminated fish [18]. Taking into account a potential 20% lost to follow up, we requested and were approved to consent 1200 pregnant women and their singleton birth children by the Institutional Review Boards of both the Government of Suriname and Tulane University.

85% of all deliveries in Suriname are hospital-based, with the remainder (14%) taking place in primary health care clinics under the supervision of a general practitioner or midwife at the Regional Health Department or a skilled healthcare worker at the Medical Mission Primary Health Care Suriname; a small proportion (1%) occurs at home. Recruitment sites included all hospitals and clinics of the Regional Health Department in Paramaribo and Nickerie and the Medical Mission Primary Health Care Suriname in the interior. In Nickerie, trained CHWs were integrated in the research team and played a key role in every aspect of the study, from recruitment to assessments at every study time point prenatally and during the neurodevelopmental assessments of the child cohort. Women who met the inclusion criteria were identified by their physician, midwife, CHW or health assistant during regular prenatal appointments and invited to participate. Inclusion criteria were: pregnant women 16 years or older; speaking Dutch, Sranan Tongo, Sarnami, Saramaccan or Trio; singleton gestation; planning to deliver at one of the study hospitals, prenatal clinics or midwife facilities associated with those hospitals or clinics; and signed informed consent. Assent was obtained from participants aged 16 and 17 years. Informed consent forms and

1  
2  
3 questionnaires were translated into the local languages Sranan Tongo, Sarnami, Saramaccan or  
4  
5 Trio. If a participant was unable to read, the recruiter read the questions in the local language.  
6  
7

8  
9 Infants were not eligible for follow-up if they were born before 33 completed weeks of gestation  
10  
11 and/or had a birthweight less than 2000 grams, significant medical or neurological condition,  
12  
13 Down syndrome, hydrocephalus, cerebral palsy, or significant visual or hearing impairment  
14  
15 inconsistent with neurocognitive testing.  
16  
17

18  
19 Main maternal and infant/child determinants included biological determinants: maternal  
20  
21 anthropometrics, blood pressure, hemoglobin, liver and kidney function, fetal and postnatal growth  
22  
23 characteristics and health status, heavy metals (blood and hair), pesticides (urine), telomere length  
24  
25 (buccal swab) and medication use; environmental determinants: maternal and child diet and  
26  
27 exposure history; social determinants: ethnicity, social support, trauma, prenatal life events,  
28  
29 maternal education, household income, household size, employment status, and marital status.  
30  
31

32  
33 Main maternal and infant/child outcomes were growth and physical development: pregnancy  
34  
35 complications, fetal and postnatal growth patterns, risk factors for maternal liver and renal  
36  
37 impairment; behavior and cognitive development: infant neuromotor development, autism  
38  
39 spectrum disorder and neuropsychological development; childhood diseases: infectious diseases,  
40  
41 respiratory and neurological disorders; health and healthcare: impact of mobile health technology-  
42  
43 enabled CHWs on prenatal health and birth outcomes, quality of life assessments and the impact  
44  
45 of health care system utilization on prenatal health and birth outcomes.  
46  
47  
48  
49  
50  
51

## 52 **Data management & statistical plan**

53  
54  
55  
56  
57  
58  
59  
60

1  
2  
3 The CCREOH field team was trained in administering all questionnaires. Data from administered  
4 questionnaires are recorded on secure, encrypted iPads, uploaded and managed using REDCap,  
5  
6 which serves as the study electronic, integrated data management system [19]. Data are uploaded  
7  
8 in REDCap's training site for data cleaning prior to integrating questionnaire and biospecimen  
9  
10 data. Data records are maintained to examine trends on source of errors, duplicate records are  
11  
12 scrubbed, and accuracy is validated through cross-checks with original data files and medical  
13  
14 records obtained through the general practitioner, midwife, health assistant or hospital  
15  
16 administration. A comprehensive biospecimen tracking system tracks analyzed samples and the  
17  
18 study's overall biospecimen repository. Communication of data updates and changes in the process  
19  
20 are delivered through emails and during bimonthly data management team meetings. The data  
21  
22 management platform allows for the interrogation of environmental, non-biospecimen and  
23  
24 biospecimen data in an integrated fashion.  
25  
26  
27  
28  
29

30  
31 De-identified data files are developed upon request of CCREOH investigators through  
32  
33 standardized data request forms. Statistical analysis plans are tailored to specific research  
34  
35 questions and include descriptive statistics, bivariate linear and logistic regression models,  
36  
37 multiple logistic regression analysis to develop predictive models, and nonparametric methods if  
38  
39 assumptions are not met. Comparison between study sites will be analyzed by comparing  
40  
41 participants, or clustered depending the research question.  
42  
43  
44  
45

46 Multiple approaches to develop and compare models for multiple exposures to toxic metals will  
47  
48 be used including a Bayesian kernel machine regression and a nonparametric Bayesian variable  
49  
50 selection framework to explore joint (or combined) effects of the multiple chemicals. Structural  
51  
52 equation models will be employed to create latent constructs of similar exposure variables and  
53  
54 then finding associations between these latent constructs and the outcome variable. Sample size  
55  
56  
57



1  
2  
3 was calculated based on a multiple linear regression model using a coefficient of determination of  
4  
5 0.10 and an R-square differential ranging between 0.01 and 0.02. Using these parameters, a number  
6  
7 between 495 and 986 was needed to have an 80% power at a 0.05 level of significance. Using the  
8  
9 more conservative R square differential of 0.02 and to account for attrition we planned on  
10  
11 recruiting around 1200 participants.  
12  
13  
14  
15  
16  
17

## 18 **Data Collection**

19  
20  
21 Maternal data were collected during pregnancy at two timepoints (first/second and third trimester).  
22  
23 Post-partum assessments are ongoing and target both mothers and children: questionnaire data  
24  
25 from mothers and biospecimens and neurodevelopmental assessments data from children are  
26  
27 collected at 12, 36, and 48 months. (Table 1).  
28  
29  
30  
31  
32  
33

### 34 **Data collection during pregnancy**

#### 35 *Questionnaires*

36  
37  
38  
39  
40 Table 1 lists standardized validated questionnaires used to assess both physiological and  
41  
42 psychosocial prenatal health. All questionnaires were translated into Dutch and other local  
43  
44 languages to address the multiple language needs of our interior sub-cohort. The main categories  
45  
46 of data collected from maternal participants were health status, demographics, reproductive health  
47  
48 history, social support, trauma history, exposure history, depression, perceived stress, prenatal life  
49  
50 events, health behavior, access to prenatal care, social status and diet. Questions on health behavior  
51  
52 were adapted from the Alcohol, Smoking and Substance Involvement Screening Test version 3  
53  
54  
55  
56  
57

1  
2  
3 (ASSIST V3.0) that was developed for the World Health Organization (WHO). Information on  
4 maternal diet was obtained by adapting the CDC's National Health and Nutrition Examination  
5 Survey (NHANES) into a culturally tailored dietary survey focusing on fish and produce  
6 consumption, including frequency of intake and portion sizes.  
7  
8  
9  
10  
11

### 12 *Biospecimen collection*

13  
14  
15  
16 The study's biospecimen repository, housed at the Academic Hospital Paramaribo's (AZP) clinical  
17 laboratory, contains 13,000 samples. Table 1 lists timepoints at which biospecimens are collected.  
18  
19 All biospecimens are collected at study site hospitals and shipped to the AZP laboratory using  
20 established chain-of-custody procedures. Samples collected from participants in remote areas are  
21 stored at 4°C for no more than 48 hours prior to delivery and processing at the Academic Hospital  
22 Paramaribo clinical laboratory. Blood, serum, plasma, and cord blood samples are aliquoted into  
23 2 ml plastic freezer tubes and stored at -80°C. Urine samples (60ml) are collected in sterile bar-  
24 coded urine collection cups, aliquoted into 10 ml plastic tubes, stored in ziplock bags at -20°C and  
25 shipped for analysis by CDC's environmental health laboratory using well-established protocols.  
26  
27  
28  
29  
30  
31  
32  
33  
34  
35

36  
37 Maternal hair samples, collected once during pregnancy, were taken according to the following  
38 protocol: 1.5 gram of hair was cut as close as possible to the hair roots with disinfected scissors  
39 and placed in patient coded ziplock bags, stored at room temperature in a climate-controlled room  
40 and sent to the National Zoological Collection of Suriname/Center for Environmental Research  
41 lab at the Anton de Kom University of Suriname (NZCS/CMO) for total Hg analysis using Cold  
42 Vapour Atomic Absorption Spectrometry (CVAAS).  
43  
44  
45  
46  
47  
48  
49  
50

### 51 *Buccal swab collection for telomere assessments*

1  
2  
3 Isohelix SK1 buccal swabs (Cell Projects, Kent, United Kingdom) are used for the collection of  
4 maternal DNA for telomere length (TL) analyses. Swabs are air dried and then stored with a  
5 dessicator pellet at 4 degrees until DNA is extracted. DNA is extracted using the QIAamp DNA  
6 mini kit protocol (Qiagen, Valencia, CA) and stored at  $-80^{\circ}\text{C}$  until assayed. Concentration of  
7 dsDNA is quantified with a Qubit dsDNA BR assay kit (Invitrogen, Carlsbad, CA), purity of the  
8 DNA is determined by using a NanoDrop 1000 spectrophotometer (Thermo Fisher Scientific,  
9 Waltham, MA), and DNA integrity is confirmed by gel electrophoresis to ensure high molecular  
10 weight DNA [20]. The average relative TL, represented by the telomere repeat copy number to  
11 single gene (albumin) copy number (T/S) ratio, is determined with monochrome multiplex  
12 quantitative real-time PCR using a BioRad CFX96 [21]. All samples are run in triplicate on  
13 duplicate plates with a standard curve and known controls.  
14  
15  
16  
17  
18  
19  
20  
21  
22  
23  
24  
25  
26  
27

### 28 29 *Trace element analyses in blood*

30  
31  
32 400 frozen maternal whole blood samples were shipped for analysis to the Wisconsin State  
33 Laboratory of Hygiene Trace Element Research Laboratory. A chain-of-custody approach was  
34 used to ensure samples were collected, maintained, processed, stored, shipped, and received  
35 according to acceptable standards. Quality assurance/quality control (QA/QC) procedures for  
36 elemental analyses and methylmercury analyses included reagent blanks, blank spikes (lab  
37 fortified blanks), sample matrix spikes, ongoing precision and recovery spikes, second source  
38 spikes, sample matrix duplicates, and external standard reference materials. All sample and  
39 QA/QC results were within the acceptable recovery limits. Duplicates for all runs were within the  
40 acceptable relative percent difference (%RPD) limits. In these 400 blood samples (200  
41 Paramaribo, 100 Nickerie, and 100 interior communities), we analyzed Hg, lead, cadmium,  
42 aluminum, manganese, tin, selenium and iron using inductively coupled plasma-mass spectrometry  
43  
44  
45  
46  
47  
48  
49  
50  
51  
52  
53  
54  
55  
56  
57  
58  
59  
60

1  
2  
3 (ICP-MS) or cold vapor atomic fluorescence spectrometry (CVAFS). Total Hg and methylmercury  
4 using CVAFS were assessed in a small subset of women (20-Paramaribo, 20-Nickerie, and 35-  
5 interior) to specify exposure sources.  
6  
7  
8  
9

### 10 *Pesticide analyses in urine*

11  
12  
13 Urine samples from pregnant women were analyzed (sub-cohort N=218) from all three study sites.  
14  
15 The six dialkylphosphate metabolites were measured using a modified method of Jayatilaka et al.  
16 [22] by solid phase extraction high performance liquid chromatography-tandem mass  
17 spectrometry<sup>1</sup>. The eight specific urinary metabolites were analyzed using a semi-automated solid  
18 phase extraction mass spectrometry method and reversed-phase high performance liquid  
19 chromatography [23]. The analysis panel consisted of dialkylphosphate metabolites of  
20 organophosphate pesticides (DAP's) including dimethylphosphate, diethylphosphate,  
21 dimethylthiophosphate, dimethyldithiophosphate, diethylthiophosphate, and  
22 diethyldithiophosphate, and a universal panel (UP) including 1 herbicide (2,4D) and its metabolite,  
23 2,4-dichlorophenoxyacetic acid; 4 OP insecticide metabolites (3,5,6-trichloro-2-pyridinol,2-  
24 isopropyl-4-methyl-6-hydroxypyrimidine, para-nitrophenol, malathion dicarboxylic acid) and 3  
25 pyrethroid metabolites (4-fluoro-3-phenoxybenzoic acid, 3-phenoxybenzoic acid, trans-3-(2,2-  
26 dichlorovinyl)-2,2-dimethylcyclopropane carboxylic acid).  
27  
28  
29  
30  
31  
32  
33  
34  
35  
36  
37  
38  
39  
40  
41  
42  
43  
44  
45  
46

### 47 **Data collection from birth through 48 months**

48  
49  
50 At birth, a cord blood sample was taken from infants for measurements of heavy metals. When a  
51 cord blood sample was not available, a blood sample was obtained by heel prick. Baseline  
52 characteristics of all births (e.g. gender, weight, gestational age, and Apgar score) were collected  
53  
54  
55  
56  
57

(Table 2). At each subsequent data collection timepoint (Table 1), the child's growth is measured and a buccal swab taken for TL analyses. In addition, the child's health status is obtained through questionnaires on diet, history of infectious diseases, and respiratory and neurological disorders. To date, we have completed the first follow-up with 85% of children. A blood sample will be taken for heavy metal measurement at 36 and 48 months. Blood samples and buccal swabs are collected and stored in the same manner as described above for mothers.

### *Behavior and cognitive development*

Neurodevelopmental assessments over the lifetime of the study include infant cognitive and motor development and behavior at 12-27 months using the Bayley Scales of Infant Development as well as assessments of cognitive and social-emotional development at 36 months, and executive function at 48 months (Table 1). The Bayley Scales are currently being administered to enrolled children by trained psychologists, psychiatrists, and study team members. Data checking following data entry of each Bayley sub-scale is conducted by other team members. To date, 832 of 992 children have been tested; remaining assessments will be completed by September 2020. Assessments at 36 and 48 months will take place as the cohort ages.

### **Data collection from fish**

Carnivorous fish from different regions in the interior of Suriname have shown high levels of Hg, specifically the frequently consumed species *Hoplias aimara* (0.43-0.66ug/g) and *Serrasalmus rhombeus* (0.23-1.38ug/g). These levels are well above international accepted standards and in certain regions, up to 7 times the norm for human consumption [24]. Polyunsaturated omega-3 fatty acids (PUFA-3) docosahexaenoic acid (DHA) and eicosapentaenoic acid (EPA) from fish

1  
2  
3 consumption may offer neuroprotective benefits during prenatal and pediatric development which  
4 could potentially counteract mercury neurotoxicity [25-27]. Some studies examining  
5 developmental trajectories of children born to women exposed to Hg in utero fail to link that  
6 exposure to adverse neurodevelopmental outcomes, suggesting that fish nutrients may ameliorate  
7 Hg toxicity and offer neuroprotective benefits [28-31].  
8  
9  
10  
11  
12  
13

14  
15 To better inform fish consumption risk, fatty acids in fish muscle tissue were measured in samples  
16 (N=5 per species) of five freshwater and three marine fish species. Levels of 27 fatty acids,  
17 including DHA and EPA, in fish muscle tissue were measured (expressed as mg fatty acid g<sup>-1</sup> dry  
18 weight) by the University of Texas Marine Science Institute. 50mg dry weight samples were  
19 homogenized in a chloroform-methanol solution (2:1 v/v) for lipid cold extraction. Lipids were  
20 then saponified in potassium hydroxide to yield fatty acid methyl esters, and then methylated  
21 in a 14% boron trifluoride solution. Individual fatty acid concentrations were determined by  
22 gas chromatography (Shimadzu GC-2014 gas chromatograph) set with a Suplecowax 10 fused  
23 silica capillary column (Milipore Sigma). Freshwater species had higher levels of linoleic acid (2.0  
24 vs. 0.2mg/g), alpha-linoleic acid (0.4 vs. 0.1mg/g), arachidonic acid (3.0 vs. 1.5mg/g), omega-6  
25 fatty acids (6.5 vs. 2.3mg/g) and lower levels of eicosapentaenoic acid (0.8 vs. 1.9mg/g) compared  
26 to marine species.  
27  
28  
29  
30  
31  
32  
33  
34  
35  
36  
37  
38  
39  
40  
41  
42  
43  
44  
45  
46

## 47 **Patient and public involvement**

48  
49 The CCREOH cohort study was preceded by a planning grant which included pilot fish and hair  
50 Hg assessments among interior communities approved by the village Chiefs or Tribal captains.  
51  
52 Building on this community partnership, the initial study design was revised based on guidance  
53  
54  
55  
56  
57

1  
2  
3 from a multi-stakeholder Community Advisory Board (CAB) and an External Scientific Advisory  
4 Board (EAB). The CAB consists of respected leaders representing organizations from the interior  
5 tribal and indigenous peoples, midwives, general practitioners and environmentalists. The EAB  
6 members represent medical directors and other clinicians of all participating hospitals,  
7 representatives from the Ministry of Health, the US Embassy, the Pan American Health  
8 Organization and the Caribbean Public Health Agency (CARPHA). Both advisory boards are  
9 convened annually to inform and give updates about study progress and results, and to seek advice  
10 on future directions and dissemination of results.  
11  
12  
13  
14  
15  
16  
17  
18  
19  
20  
21  
22  
23  
24

### 25 **Dissemination of study results**

26  
27  
28 Every participant with neurotoxicant levels of imminent health concern is contacted and asked to  
29 repeat the test for confirmation. If the level remains of concern, the participant is referred to her  
30 attending physician. Children with neurodevelopmental delay are referred to a child psychologist.  
31  
32 Participants and the general public were invited to health fairs, meetings and conferences, where  
33 preliminary study results were presented and discussed. CCREOH data have been presented at  
34 regional and international conferences, including CARPHA, the International Society of  
35 Environmental Epidemiology, the Consortium for Universities in Global Health, the American  
36 Public Health Association and at scientific meetings convened by the US NIH. The study team is  
37 working with the EAB and CAB to develop a collaborative translation and dissemination strategy  
38 for overall, final study results when those become available.  
39  
40  
41  
42  
43  
44  
45  
46  
47  
48  
49  
50  
51  
52  
53  
54

### 55 **Findings to date**

1  
2  
3 From December 2016 until July 2019, 1143 pregnant women were enrolled; 74 (6.5%) were  
4 ineligible (Figure 1). Geographically, 738 women were enrolled in Paramaribo, 204 in Nickerie,  
5 and 201 in the interior. In comparison to participants, non-participants were more often of Creole  
6 and Tribal ethnicity, lived in Paramaribo, and had lower household income. Table 2 presents  
7 baseline maternal characteristics: one in eight women was 16-19 years old, ethnic distribution was  
8 representative of the Surinamese population, and >50% had no or lower vocational/secondary  
9 education level.  
10  
11

12  
13  
14  
15  
16  
17  
18  
19  
20 Of the 1069 babies born, 992 were enrolled (93%) (Figure 1). To date, the total number of  
21 biospecimens (N=13,379) collected from 1143 pregnant women include whole blood for trace  
22 elements (N=1994), whole blood collected in K2EDTA anticoagulant (N=1994), serum collected  
23 in serum separator tubes (N=1994), plasma (N=1994), urine (N=1980), buccal swabs (N=941),  
24 and hair (N=876). From 992 infants, either cord blood (N=441) or blood from heel prick (N=323)  
25 was collected at birth, and buccal swabs (N=842) during neurodevelopmental assessment at 12  
26 months. All samples not yet analyzed are archived for future targeted and untargeted analyses.  
27  
28  
29 Available results include total Hg concentrations in hair, prenatal maternal depression and  
30 perceived stress, level of pesticides in produce, and dietary exposure to Hg in fish. Results of heavy  
31 metals in blood, urinary pesticide metabolites, telomere analysis, and neurodevelopmental  
32 assessments are pending.  
33  
34  
35  
36  
37  
38  
39  
40  
41  
42  
43  
44  
45  
46  
47  
48

### 49 **Biological specimens**

50  
51  
52 Total hair Hg was measured in 876 participants from all three study sites. Overall, 39.1% had  
53 elevated total Hg hair levels that exceeded the U.S. Environmental Protection Agency's (USEPA)  
54  
55  
56  
57



1  
2  
3 action level (1.1µg/g hair) [32]. Elevated Hg levels were found in 95.8%, 26.3%, and 25.5% of  
4  
5 participants from the interior, Nickerie and Paramaribo, respectively. Results for median total Hg  
6  
7 concentrations in hair from pregnant women from Paramaribo (N=522) were 0.64µg/g hair  
8  
9 (interquartile ranges (IQR) 0.36-1.09; range 0.00-7.12), from Nickerie (N=176) 0.73µg/g (IQR  
10  
11 0.45-1.05;0.00-5.79) and the interior (N=178) 3.48µg/g (IQR 1.92-7.39;0.38-18.20). Pregnant  
12  
13 women from the interior were exposed to high levels of Hg compared to women from the coastal  
14  
15 area and thus fetal exposures are expected to be high. Most of these women are primarily exposed  
16  
17 to methylmercury from consuming contaminated fish from local artisanal gold-mining activities  
18  
19 [18,24]. Other possible sources of exposure may include active participation in or living very close  
20  
21 to gold mining areas. Hg concentrations from the Nickerie and Paramaribo sub-cohorts were  
22  
23 similar to other studies [33,34].  
24  
25  
26  
27  
28  
29  
30  
31

### 32 **Prenatal depression and perceived stress**

33  
34  
35 Depression and prenatal stress in 722 participants were assessed using the standardized Edinburgh  
36  
37 Depression Scale (EDS) (cut-off  $\geq 12$  for probable depression) and the Cohen Perceived Stress  
38  
39 Scale (cut-off  $\geq 20$  for high perceived stress). One in four (24.9%) participants had EDS scores  
40  
41 indicative of probable depression, three in ten (30.2%) had high stress levels and nearly half  
42  
43 (49.1%) of these women had probable depression.  
44  
45  
46  
47  
48  
49

### 50 **Dietary exposure to pesticides**

51  
52 An assessment of Surinamese agricultural produce showed pesticide residues exceeding European  
53  
54 Union maximum residue limits, including prohibited-worldwide endosulfan and lindane in the  
55  
56  
57

1  
2  
3 leafy vegetable tannia, *Xanthosoma brasiliense* [35]. An interviewer-assisted NHANES-based  
4 dietary survey of 522 participants showed that 98.2% reported consumption of leafy vegetables.  
5  
6 Tannia was the most frequently consumed (89.3%); 36.5% participants had high intake rates of  
7  
8 tannia ( $\geq 36$  gram/day) [36]. Tannia is also a commonly used vegetable in baby food preparation  
9  
10 in Suriname.  
11  
12  
13  
14  
15  
16  
17

### 18 **Dietary exposure to Hg in fish**

19  
20 Dietary questionnaire analyses (N=990) showed an overall fish consumption of 96.1%.  
21  
22 Consumption of the three most consumed carnivorous species- *Hoplias aimara*, *Serrasalmus*  
23 *rhombus* and *Cichla ocellaris*-, known to have high Hg levels, was 44.4%, 19.3%, and 26.3%,  
24  
25 and was greater among the interior subcohort (N=123): 89.4%, 67.5%, and 74.8%, respectively.  
26  
27 Intake rates (based on reported meal frequency and portion sizes) for these three carnivorous  
28  
29 species ranged between 0.01-2.5 kilograms per week. Hg speciation indicated that methylmercury  
30  
31 was predominantly found in the biospecimens. This is consistent with fish consumption likely  
32  
33 being the primary source of Hg exposure in our participants.  
34  
35  
36  
37  
38  
39  
40  
41  
42

### 43 **Strengths and limitations**

44  
45 This CCREOH study is the first to examine the potential impact of complex environmental  
46  
47 exposures on maternal and child health in Suriname by a multi-disciplinary team of scientists.  
48  
49 Study's strengths include: 1) addressing two high priority public health threats: the impact of Hg  
50  
51 exposure from artisanal gold mining, and pesticide exposure associated with agricultural practices;  
52  
53 2) inclusion in the cohort of two vulnerable subpopulations: pregnant women and children; 3) the  
54  
55  
56  
57

1  
2  
3 longitudinal follow-up of children until 48 months with built-in timepoints to assess  
4 neurodevelopmental outcomes; and 4) a biospecimen bank of approximately 13,000 samples,  
5 providing the opportunity for future analyses. Moreover, a linked research training grant facilitates  
6 the training of nine Surinamese PhD candidates with dissertation research embedded in the study,  
7 thereby building critical in-country environmental health research capacity.  
8  
9  
10  
11  
12  
13

14  
15 Delayed recruitment and data collection of the logistically difficult to reach sub-cohort in the  
16 interior region (N=200) was ameliorated by additional team support onsite; delays in transporting  
17 interior biospecimens rendered some early cord blood specimens not analyzable and was corrected  
18 by collecting an additional heelprick sample. Other limitations include differences in educational  
19 level between women from the three recruitment sites that could confound or impact literacy.  
20 Participants may have moved between regions with different sources of exposure. Delayed  
21 recruitment of some interior participants may limit our ability to examine differential effects of  
22 exposure across gestation for this sub-cohort.  
23  
24  
25  
26  
27  
28  
29  
30  
31  
32  
33  
34  
35  
36  
37

### 38 **Future plans**

39  
40  
41 Culturally-tailored fish consumption advisories are in development to reduce Hg exposure. An  
42 expanded assessment of potentially neuroprotective fish nutrients is under way. A pesticide  
43 literacy scale will assist in countering pesticide exposure. Repeated telomere length measurements  
44 of children as an indicator of exposure to environmental toxins will be taken. Neurodevelopmental  
45 assessments will take place at 36 and 48 months. An integrated, sharable data management system  
46 is in development.  
47  
48  
49  
50  
51  
52  
53  
54  
55  
56  
57

## Acknowledgements

We would like to thank our recruiters Jeetendra Jitan, Nishaira Doerga, Gimradj Dwarka, Sue-Ann Sitaram, Devika Kalika, the Community Health Workers from Nickerie Lilian Singotiko, Henna Mawo, Karien Jodiwongso, Karishma Bhondoe, Jay Kalicharan, Bhairam Goberdan, Azeez Khodabaks, the midwives and laboratory personnel of the Academic Hospital Paramaribo, Diakonessenhuis Hospital, St. Vincentius Hospital, 's-Lands Hospital, Mungra Medical Centre, Regional Health Service clinics and Medical Mission Primary Health Care Suriname, the National Zoological Collection of Suriname/Center for Environmental Research staff, Sila Kisoensingh MSc, Dr. Richenel Ellecom and Dr. Melissa Middleton for their help during the pediatric neurodevelopment assessments, and the members of the External Advisory Board and Community Advisory Board for their guidance and valuable advice.

## Collaborators

We welcome collaboration with fellow researchers working on similar projects. Specific research proposals can be sent directly to the Principal Investigators Drs. Wilco Zijlmans ([wilco.zijlmans@uvs.edu](mailto:wilco.zijlmans@uvs.edu)) and Maureen Lichtveld ([mlichtve@tulane.edu](mailto:mlichtve@tulane.edu)). Areas of collaboration include further environmental and biomarkers assessment of arsenic exposure, occupational health risk assessments associated with mercury and pesticide exposure, and exposomic analyses including metabolomic assessments.

## Author Contributions

1  
2  
3 MYL, JKW, HHC, EWH, AS, SSD and WCWRZ designed and established the cohort. MSMO,  
4  
5 ADHM, EWH, FAW and AG participated in the design of the questionnaires. WCWRZ, MSMO,  
6  
7 EB, WBH, GKB, RR and MYL are responsible for the continued management of the cohort. GKB,  
8  
9 RR, AG and FAW are actively involved with recruitment of participants and collection of non-  
10  
11 biospecimen data and biospecimens. JC, JR, PEO and GAL store, archive and analyze the  
12  
13 biomarker samples. ADHM, AS, MSMO, AG, MYL and WCWRZ are responsible for data  
14  
15 management. SSD, AWEG, RR and EB manage neurodevelopmental testing of babies. JKW, LFS,  
16  
17 CSA, SSD interpret all results. WCWRZ, JKW, HHC, ADHM and MYL drafted and edited the  
18  
19 manuscript. All authors critically reviewed and approved the final manuscript.  
20  
21  
22  
23  
24  
25  
26

## 27 **Funding**

28  
29  
30 Research reported in this publication was supported by the Fogarty International Center of the  
31  
32 National Institutes of Health under Award Numbers: U01TW010087 and U2RTW010104. The  
33  
34 content is solely the responsibility of the authors and does not necessarily represent the official  
35  
36 views of the National Institutes of Health.  
37  
38  
39  
40  
41  
42  
43

## 44 **Competing interests**

45  
46  
47 None declared  
48  
49  
50  
51  
52

## 53 **Patient consent for publication**

1  
2  
3 Obtained  
4  
5  
6  
7  
8

9  
10 **Ethical approval**  
11

12 This study was IRB approved by both the Government of Suriname and the Tulane University,  
13 New Orleans, Louisiana, USA, to consent 1200 pregnant women and their singleton birth  
14 children.  
15  
16  
17  
18  
19  
20  
21  
22  
23

24 **Provenance and peer review**  
25

26 Not commissioned; externally peer reviewed.  
27  
28  
29  
30  
31  
32

33 **Data sharing statement**  
34

35  
36 Our cohort study data will be made publicly available upon publication of the results in scientific  
37 articles. Questionnaire, registry and biospecimen data could be made accessible in de-identified  
38 form after an application process that includes submission of a research plan. We are currently  
39 collaborating with Research Triangle Institute International (RTI), a global data management  
40 enterprise, to develop an integrated database of biospecimen and non-biospecimen data. Once  
41 that is fully developed, data can be made available based on a reasonable request to the PIs. Such  
42 requests will be discussed with the full investigator Committee, the Data Management  
43 Committee, and the Administrative Oversight Committee.  
44  
45  
46  
47  
48  
49  
50  
51  
52  
53  
54  
55  
56  
57  
58  
59  
60

## References

1. Lichtveld MY, Hawkins WB, Ouboter PE *et al.* A One Health approach to interdict environmental health threats in Suriname. *Ann Glob Health* 2016;82:444.
2. Silbergeld EK, Patrick TE. Environmental exposures, toxicologic mechanisms, and adverse pregnancy outcomes. *Am J Obstet Gynecol* 2005;192:S11-21.
3. Ferguson KK, O'Neill MS, Meeker JD. Environmental contaminant exposures and preterm birth: a comprehensive review. *J Toxicol Environ Health B Crit Rev* 2013;16:69-113.
4. Wigle DT, Arbuckle TE, Turner MC *et al.* Epidemiologic evidence of relationships between reproductive and child health outcomes and environmental chemical contaminants. *J Toxicol Environ Health B Crit Rev* 2008;11:373-517.
5. Lewis M, Worobey J, Ramsay DS *et al.* Prenatal exposure to heavy metals: effect on childhood cognitive skills and health status. *Pediatrics* 1992;89:1010-5.
6. Burns CJ, McIntosh LJ, Mink PJ, Jurek AM, Li AA. Pesticide exposure and neurodevelopmental outcomes: Review of the epidemiologic and animal studies. *J Toxicol Environ Health B Crit Rev* 2013;16:127-283.
7. Eskenazi B, Kogut K, Huen K *et al.* Organophosphate pesticide exposure, PON1, and neurodevelopment in school-age children from the CHAMACOS study. *Environ Res* 2014;134C:149-57.

- 1  
2  
3 8. Furlong MA, Engel SM, Barr DB, Wolff MS. Prenatal exposure to organophosphate pesticides  
4 and reciprocal social behavior in childhood. *Environ Int* 2014;70:125-31.  
5  
6  
7
- 8 9. Quirós-Alcalá L, Alkon AD, Boyce WT *et al*. Maternal prenatal and child organophosphate  
9 pesticide exposures and children's autonomic function. *Neurotoxicology* 2011;32:646-55.  
10  
11  
12
- 13 10. Rosas LG, Eskenazi B. Pesticides and child neurodevelopment. *Curr Opin Pediatr*  
14 2008;20:191-7.  
15  
16  
17
- 18 11. Belles M, Albina ML, Sanchez DJ *et al*. Interactions in developmental toxicology: effects of  
19 concurrent exposure to lead, organic mercury, and arsenic in pregnant mice. *Arch Environ*  
20 *Contam Toxicol* 2002;42:93-8.  
21  
22  
23  
24  
25
- 26 12. Callahan MA, Sexton K. If cumulative risk assessment is the answer, what is the question?  
27 *Environ Health Perspect* 2007;115:799-806.  
28  
29  
30  
31
- 32 13. Golding J, Rai D, Gregory S *et al*. Prenatal mercury exposure and features of autism: a  
33 prospective population study. *Mol Autism* 2018;9:30.  
34  
35  
36
- 37 14. Valent F, Mariuz M, Bin M *et al*. Associations of prenatal mercury exposure from maternal  
38 fish consumption and polyunsaturated fatty acids with child neurodevelopment: a prospective  
39 cohort study in Italy. *J Epidemiol* 2013;23:360-70.  
40  
41  
42  
43  
44
- 45 15. Sapbamrer R, Hongsibsong S. Effects of prenatal and postnatal exposure to organophosphate  
46 pesticides on child neurodevelopment in different age groups: a systematic review. *Environ*  
47 *Sci Pollut Res Int* 2019;26:18267-90.  
48  
49  
50  
51  
52  
53  
54  
55  
56  
57



- 1  
2  
3 16. Wang J, Wu W, Li H *et al.* Relation of prenatal low-level mercury exposure with early child  
4 neurobehavioral development and exploration of the effects of sex and DHA on it. *Environ Int*  
5 2019;126:14-23.  
6  
7  
8  
9  
10  
11 17. Results Eighth Population and Housing Census in Suriname (Volume 1) Demographic and  
12 Social Characteristics and Migration. *General Bureau of Statistic Studies in Suriname (ABS)*  
13 2013.  
14  
15  
16  
17  
18 18. Ouboter PE, Landburg G, Satnarain GU *et al.* Mercury Levels in Women and Children from  
19 Interior Villages in Suriname, South America. *Int J Environ Res Public Health* 2018;15:1007.  
20  
21  
22  
23  
24 19. Harris PA, Taylor R, Minor BL *et al.* The REDCap consortium: Building an international  
25 community of software partners, *J Biomed Inform* 2019;95:1-10.  
26  
27  
28  
29 20. Stacy S. Drury, Emily Mabile, Zoë H. Brett *et al.* The Association of Telomere Length With  
30 Family Violence and Disruption. *Pediatrics* 2014;134:e128–e137.  
31  
32  
33  
34 21. Cawthon RM. Telomere length measurement by a novel monochrome multiplex qualitative  
35 PCR method. *Nucleic Acids Res* 2009;37:e21.  
36  
37  
38  
39 22. Jayatilaka NK, Restrepo P, Williams L, *et al.* Quantification of three chlorinated dialkyl  
40 phosphates, diphenyl phosphate, 2,3,4,5-tetrabromobenzoic acid, and four other  
41 organophosphates in human urine by solid phase extraction-high performance liquid  
42 chromatography-tandem mass spectrometry. *Anal Bioanal Chem* 2017;409:1323-32.  
43  
44  
45  
46  
47  
48  
49 23. Davis MD, Wade EL, Restrepo PR, *et al.* Semi-automated solid phase extraction method for  
50 the mass spectrometric quantification of 12 specific metabolites of organophosphorus  
51  
52  
53  
54  
55  
56  
57  
58  
59  
60

- 1  
2  
3 pesticides, synthetic pyrethroids, and select herbicides in human urine. *Journal of*  
4  
5 *Chromatography B*. 2013;929:18-26  
6  
7  
8  
9 24. Ouboter PE, Landburg GA, Quik JHM, Mol JHA, van der Lugt F. Mercury Levels in Pristine  
10  
11 and Gold Mining Impacted Aquatic Ecosystems of Suriname, South America. *Ambio*  
12  
13 2012;41:873-82.  
14  
15  
16 25. Dellinger MJ, Olson JT, Holub BJ, Ripley MP. Mercury, polychlorinated biphenyls, selenium,  
17  
18 and fatty acids in tribal fish harvests of the upper great lakes. *Risk Anal* 2018;38:2029-2040.  
19  
20  
21 26. Ginsberg GL, Toal BF, McCann PJ. Updated risk/benefit analysis of fish consumption effects  
22  
23 on neurodevelopment: Implications for setting advisories. *Hum. Ecol. Risk Assess*  
24  
25 2015;21:1810-1839.  
26  
27  
28  
29 27. Clarkson TW, Strain JJ. Nutritional factors may modify the toxic action of methyl mercury in  
30  
31 fish-eating populations. *J. Nutr* 2003;133:1539S-1543S.  
32  
33  
34 28. Davidson PW, Strain JJ, Myers GJ et al. Neurodevelopmental effects of maternal nutritional  
35  
36 status and exposure to methylmercury from eating fish during pregnancy. *Neurotoxicology*  
37  
38 2008;29:767-75.  
39  
40  
41  
42 29. Strain JJ, Yeates AJ, van Wijngaarden E et al. Prenatal exposure to methyl mercury from fish  
43  
44 consumption and polyunsaturated fatty acids: associations with child development at 20 mo of  
45  
46 age in an observational study in the Republic of Seychelles. *Am J Clin Nutr* 2015;101:530-7.  
47  
48  
49  
50 30. Taylor CM, Golding J, Emond AM. Blood mercury levels and fish consumption in pregnancy:  
51  
52 Risks and benefits for birth outcomes in a prospective observational birth cohort. *Int J Hyg*  
53  
54 *Environ Health* 2016;219:513-520.  
55  
56  
57

- 1  
2  
3 31. Golding J, Gregory S, Emond A et al. Prenatal mercury exposure and offspring behaviour in  
4 childhood and adolescence. *Neurotoxicology* 2016;57:87-94.  
5  
6  
7  
8  
9 32. Mercury Study Report to Congress Volume V: Health Effects of Mercury and Mercury  
10 Compounds. Volume 5. United States Environmental Protection Agency; Washington, DC,  
11 USA: 1997;1–348.  
12  
13  
14  
15  
16 33. Zilversmit L, Wickliffe J, Shankar A, Taylor R, Harville E. Correlations of biomarkers and  
17 self-reported seafood consumption among pregnant and non-pregnant women in southeastern  
18 Louisiana after the Gulf oil spill: the GROWH study. *Int J Environ Res Public Health* 2017;14:  
19 784.  
20  
21  
22  
23  
24  
25  
26 34. Castaño A, Cutanda F, Esteban M, et al. Fish consumption patterns and hair mercury levels in  
27 children and their mothers in 17 EU countries. *Environ Res* 2015;141:58-68.  
28  
29  
30  
31 35. Abdoel Wahid F, Wickliffe J, Wilson M et al. Presence of pesticide residues on produce  
32 cultivated in Suriname. *Environ Monit Assess* 2017;189:303.  
33  
34  
35  
36  
37 36. F. Abdoel Wahid, A. D. Hindori-Mohangoo, M. Wilson et al. Dietary Exposure to Pesticides  
38 in Pregnant Surinamese Women. *Environ Health Perspect* 2018;  
39 <https://doi.org/10.1289/isesisee.2018.P01.2380>  
40  
41  
42  
43  
44  
45  
46  
47  
48  
49  
50  
51  
52  
53  
54  
55  
56  
57  
58  
59  
60

**Table 1.** Assessments completed by the CCREOH-MeKiTamara Cohort with timeline

| Assessments                    | Trimester                        |                 | Birth | 12<br>mos | 36<br>mos | 48<br>mos |
|--------------------------------|----------------------------------|-----------------|-------|-----------|-----------|-----------|
|                                | 1 <sup>st</sup> /2 <sup>nd</sup> | 3 <sup>rd</sup> |       |           |           |           |
| <b>Mother</b>                  |                                  |                 |       |           |           |           |
| Obstetric history              | •                                | •               |       |           |           |           |
| Demographics                   | •                                |                 |       |           |           |           |
| Residency                      | •                                | •               |       |           |           |           |
| Anthropometrics                | •                                | •               |       |           |           |           |
| Marital status                 | •                                |                 |       |           |           |           |
| Ethnicity                      | •                                |                 |       |           |           |           |
| Occupation                     | •                                |                 |       |           |           |           |
| Education                      | •                                |                 |       |           |           |           |
| Household income               | •                                |                 |       |           |           |           |
| Household composition          | •                                |                 |       |           |           |           |
| Maternity care                 | •                                | •               |       |           |           |           |
| Medication                     |                                  | •               |       |           |           |           |
| <b>Questionnaires</b>          |                                  |                 |       |           |           |           |
| SF 36 Health Survey            | •                                | •               |       |           |           |           |
| Social Support List            | •                                |                 |       |           |           |           |
| Brief Trauma Interview         | •                                | •               |       |           | •         | •         |
| Cohen's Perceived Stress Scale | •                                | •               |       |           | •         | •         |
| Edinburgh Depression Scale     | •                                | •               |       |           | •         | •         |
| ASSIST V3.0                    | •                                | •               |       |           | •         | •         |
| Exposure History               | •                                |                 |       |           |           |           |
| Prenatal Life Events Scale     | •                                | •               |       |           |           |           |
| Subjective Social Status       | •                                | •               |       |           |           |           |
| Dietary Assessment             | •                                | •               |       |           |           |           |
| Family Environment Scale       |                                  |                 |       |           | •         | •         |
| Parenting Stress Index         |                                  |                 |       |           | •         | •         |
| <b>Biological samples</b>      |                                  |                 |       |           |           |           |
| Hair                           | •                                |                 |       |           |           |           |
| Blood                          | •                                | •               |       |           |           |           |
| Urine                          | •                                | •               |       |           |           |           |
| Buccal swab                    | •                                |                 |       |           |           |           |
| <b>At birth</b>                |                                  |                 |       |           |           |           |
| Mode of delivery               |                                  |                 | •     |           |           |           |
| Cord or heelprick blood sample |                                  |                 | •     |           |           |           |
| Birth outcomes                 |                                  |                 | •     |           |           |           |
| <b>Child development</b>       |                                  |                 |       |           |           |           |
| Physical examination           |                                  |                 |       | •         | •         | •         |
| <b>Questionnaires</b>          |                                  |                 |       |           |           |           |
| Generation R                   |                                  |                 |       | •         | •         | •         |
| M-CHAT                         |                                  |                 |       |           | •         |           |
| Child Behavior Checklist       |                                  |                 |       |           | •         | •         |
| Bayley SEQ                     |                                  |                 |       |           | •         |           |

1  
2  
3  
4  
5  
6  
7  
8  
9  
10  
11  
12  
13  
14  
15  
16  
17  
18  
19  
20  
21  
22  
23  
24  
25  
26  
27  
28  
29  
30  
31  
32  
33  
34  
35  
36  
37  
38  
39  
40  
41  
42  
43  
44  
45  
46  
47  
48  
49  
50  
51  
52  
53  
54  
55  
56  
57  
58  
59  
60

|                               |   |   |   |
|-------------------------------|---|---|---|
| Ages and Stages Questionnaire |   | • |   |
| Neurodevelopmental tests      |   |   |   |
| BSID-III                      | • |   |   |
| CANTAB                        |   |   | • |
| Biological samples            |   |   |   |
| Buccal swab                   | • | • | • |
| Blood                         |   | • | • |
| Urine                         |   | • | • |

---

Notes: ASSIST V3.0 = Alcohol, Smoking and Substance Involvement Screening Test Version 3, Subjective Social Status = MacArthur Scale of Subjective Social Status, M-CHAT = Modified Checklist for Autism in Toddlers, Bayley SEQ = Bayley Social Emotional Questionnaire, BSID-III = Bayley Scales of Infant Development Third Edition, CANTAB = Cambridge Neuropsychological Test Automated Battery. Generation R = questionnaires on pediatric health and diet history (with permission from The Generation R Study Group)

For peer review only

**Table 2.** Distribution of maternal and infant characteristics

| Maternal characteristics<br>(N=1143) | N   | %    | Infant characteristics (N=971)        | N   | %    |
|--------------------------------------|-----|------|---------------------------------------|-----|------|
| <u>Age at intake</u>                 |     |      | <u>Gender</u>                         |     |      |
| 16-19 years                          | 142 | 12.6 | Male                                  | 510 | 52.5 |
| 20-24 years                          | 260 | 22.8 | Female                                | 457 | 47.1 |
| 25-29 years                          | 291 | 25.5 | Missing                               | 4   | 0.4  |
| 30-34 years                          | 268 | 23.5 | <u>Birth status</u>                   |     |      |
| 35-39 years                          | 140 | 12.3 | Live birth                            | 947 | 97.5 |
| 40+ years                            | 39  | 3.4  | Stillbirth                            | 23  | 2.4  |
| Missing                              | 1   | 0.1  | Missing                               | 1   | 0.1  |
| <u>Parity</u>                        |     |      | <u>Birthweight (in grams)</u>         |     |      |
| 0 previous live births               | 384 | 33.7 | Low birthweight (<2500)               | 127 | 13.1 |
| 1 previous live birth                | 312 | 27.3 | Normal birthweight (≥2500)            | 835 | 86.0 |
| 2 previous live births               | 187 | 16.4 | Missing                               | 9   | 0.9  |
| 3 previous live births               | 112 | 9.8  | <u>Gestational age (in weeks)</u>     |     |      |
| 4+ previous live births              | 146 | 12.8 | Very preterm births (22+0-32+6)       | 39  | 4.0  |
| Missing                              | 2   | 0.2  | Moderately preterm births (33+0-36+6) | 107 | 11.0 |
| <u>Ethnicity</u>                     |     |      | Term births (≥37+0)                   | 817 | 84.1 |
| Creole                               | 249 | 21.8 | Missing                               | 8   | 0.8  |
| Hindustani                           | 233 | 20.4 | <u>Apgar score at 5 minutes</u>       |     |      |
| Indigenous                           | 155 | 13.6 | 0 - 6                                 | 31  | 3.2  |
| Javanese                             | 101 | 8.8  | 7 - 10                                | 918 | 94.5 |
| Tribal                               | 271 | 23.7 | Missing                               | 22  | 2.3  |
| Mixed                                | 127 | 11.1 |                                       |     |      |
| Other                                | 7   | 0.6  |                                       |     |      |
| Missing                              | 0   | 0.0  |                                       |     |      |
| <u>Educational level</u>             |     |      |                                       |     |      |
| No or primary                        | 276 | 24.1 |                                       |     |      |
| Lower vocational/secondary           | 382 | 33.4 |                                       |     |      |

1  
2  
3  
4  
5  
6  
7  
8  
9  
10  
11  
12  
13  
14  
15  
16  
17  
18  
19  
20  
21  
22  
23  
24  
25  
26  
27  
28  
29  
30  
31  
32  
33  
34  
35  
36  
37  
38  
39  
40  
41  
42  
43  
44  
45  
46  
47

|                                     |      |      |
|-------------------------------------|------|------|
| Upper vocational/secondary          | 317  | 27.7 |
| Tertiary                            | 168  | 14.7 |
| Missing                             | 0    | 0.0  |
| Household income SRD*               |      |      |
| <1500                               | 401  | 35.1 |
| 1500-2999                           | 362  | 33.0 |
| 3000-4999                           | 221  | 20.2 |
| 5000+                               | 112  | 9.8  |
| Missing                             | 47   | 4.1  |
| Marital status                      |      |      |
| Married or living with partner      | 1000 | 87.6 |
| Not married/not living with partner | 141  | 12.4 |
| Missing                             | 2    | 0.2  |

\* SRD = Surinamese dollar, equivalent to 0.13 USD.

For peer review only

1  
2  
3 **Figure legends**  
4  
5  
6

7 **Figure 1.** Flowchart with participant enrolment.  
8  
9  
10  
11  
12  
13  
14  
15  
16  
17  
18  
19  
20  
21  
22  
23  
24  
25  
26  
27  
28  
29  
30  
31  
32  
33  
34  
35  
36  
37  
38  
39  
40  
41  
42  
43  
44  
45  
46  
47  
48  
49  
50  
51  
52  
53  
54  
55  
56  
57  
58  
59  
60

For peer review only



1  
2  
3  
4  
5  
6  
7  
8  
9  
10  
11  
12  
13  
14  
15  
16  
17  
18  
19  
20  
21  
22  
23  
24  
25  
26  
27  
28  
29  
30  
31  
32  
33  
34  
35  
36  
37  
38  
39  
40  
41  
42  
43  
44  
45  
46  
47  
48  
49  
50  
51  
52  
53  
54  
55  
56  
57  
58  
59  
60



Supplement: bmjopen-2019-034702.draft_revisions.pdf [file bmjopen-2019-034702.draft_revisions.pdf]
